# Supplementary material for: Magnesium-catalyzed hydroboration of organic carbonates, carbon dioxide and esters
Source: Royal Society of Chemistry journal article supplement (doi:10.1039/d0dt00465k), 2020-01-01
Supplement: d0dt00465k1.pdf [file d0dt00465k1.pdf]

## Supporting Information

### Magnesium-catalyzed hydroboration of organic carbonates, carbon dioxide and esters

Xu Cao,<sup>a†</sup> Weifan Wang,<sup>a†</sup> Kai Lu,<sup>a</sup> Weiwei Yao,<sup>\*b</sup> Fei Xue<sup>\*a</sup> and Mengtao Ma<sup>\*a</sup>

<sup>a</sup> *College of Science, Nanjing Forestry University, Nanjing 210037, China*

<sup>b</sup> *College of Pharmacy, Nanjing University of Chinese Medicine, Nanjing 210023, China*

#### Contents

General Information

General Procedure for Hydroboration of Carbonates

A Typical Procedure for the Synthesis of Boronate Esters and Their Hydrolysis to Alcohols

Optimization of Esters Hydroboration

General Procedure for Hydroboration of Esters

General Procedure for Hydroboration of CO<sub>2</sub>

<sup>1</sup>H, <sup>13</sup>C and <sup>11</sup>B NMR Spectra

References

**General Information.** All reactions were performed under an atmosphere of nitrogen using glovebox technique.  $^1\text{H}$ ,  $^{13}\text{C}\{^1\text{H}\}$ , and  $^{11}\text{B}\{^1\text{H}\}$  NMR spectra were recorded at 25 °C on Bruker Avance III 600 MHz or 400 MHz spectrometer in deuterated solvents and were referenced to the resonances of the solvent used. The following abbreviations are used; s: singlet, d: doublet, t: triplet, q: quartet, m: multiplet. All commercially available chemicals were purchased from Sigma-Aldrich or Alfa Aesar, and used without further purification. The compounds  $[(^{\text{Ar}}\text{Nacnac})\text{Mg}]_2$  (Ar = Dipp, Mes, Xyl, DippXyl) and  $[(^{\text{Xyl}}\text{Nacnac})\text{MgI}(\text{OEt}_2)]$  were prepared by literature procedures.<sup>S1-4</sup>

**General Procedure for Hydroboration of Carbonates.** Carbonates (0.40 mmol), HBpin (1.3 mmol) and catalyst **1** (1 mol%) were placed in a 10 ml Schlenk flask equipped with a magnetic stir bar inside the glove box. The reaction mixture was stirred for 6 h at 25 °C, and then subjected to NMR analysis. The progress of the reaction was monitored by  $^1\text{H}$  NMR,  $^{13}\text{C}$  NMR, and  $^{11}\text{B}$  NMR, which indicated the completion of the reaction by the disappearance of the carbonate proton and appearance of new products and  $\text{CH}_3\text{OBpin}$ .

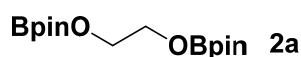

$^1\text{H}$  NMR ( $\text{CDCl}_3$ ):  $\delta$  3.86 (s, 4H,  $\text{OCH}_2$ ), 1.17 (s, 24H,  $\text{BOCMe}_2$ ).  $^{13}\text{C}\{^1\text{H}\}$  NMR (151 MHz,  $\text{CDCl}_3$ ):  $\delta$  82.65 ( $\text{BOCMe}_2$ ), 64.98 ( $\text{OCH}_2$ ), 24.54 ( $\text{BOCMe}_2$ ).  $^{11}\text{B}\{^1\text{H}\}$  NMR (193 MHz,  $\text{CDCl}_3$ ):  $\delta$  22.22.

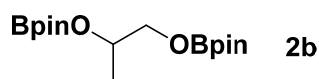

$^1\text{H}$  NMR ( $\text{CDCl}_3$ ):  $\delta$  4.22-4.17 (m, 1H, CH), 3.66 (d,  $^3J_{\text{HH}} = 4.2$  Hz, 2H,  $\text{OCH}_2$ ), 1.17 (s, 24H,  $\text{BOCMe}_2$ ), 1.09 (d,  $^3J_{\text{HH}} = 6.0$  Hz, 3H, Me).  $^{13}\text{C}\{^1\text{H}\}$  NMR (151 MHz,  $\text{CDCl}_3$ ):  $\delta$  82.66, 82.62 ( $\text{BOCMe}_2$ ), 70.27 ( $\text{OCH}_2$ ), 69.06 (CH), 24.55, 24.48 ( $\text{BOCMe}_2$ ), 18.41 (Me).  $^{11}\text{B}\{^1\text{H}\}$  NMR (193 MHz,  $\text{CDCl}_3$ ):  $\delta$  22.22.

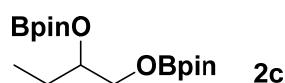

$^1\text{H}$  NMR ( $\text{CDCl}_3$ ):  $\delta$  3.99-3.80 (m, 1H, CH), 3.77-3.65 (m, 2H,  $\text{OCH}_2$ ), 1.49-1.36 (m,



24.54, 24.48 (BOCMe<sub>2</sub>). <sup>11</sup>B{<sup>1</sup>H} NMR (193 MHz, CDCl<sub>3</sub>): δ 22.21.

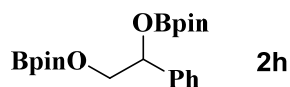

<sup>1</sup>H NMR (CDCl<sub>3</sub>): δ 7.28-7.04 (m, 4H, *Ar-H*), 5.22 (dd, *J*<sub>HH</sub> = 8.0, 4.1 Hz, 1H, *CH*), 3.89-3.88 (m, 2H, *CH*<sub>2</sub>), 1.06 (s, 24H, BOCMe<sub>2</sub>). <sup>13</sup>C{<sup>1</sup>H} NMR (151 MHz, CDCl<sub>3</sub>): δ 128.09, 127.94, 127.69, 127.45 (*Ar-C*), 82.62, 82.50 (BOCMe<sub>2</sub>), 77.07 (*CH*), 68.69(OCH<sub>2</sub>). <sup>11</sup>B{<sup>1</sup>H} NMR (193 MHz, CDCl<sub>3</sub>): δ 22.38.

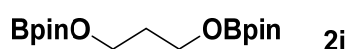

<sup>1</sup>H NMR (CDCl<sub>3</sub>): δ 3.85 (t, <sup>3</sup>*J*<sub>HH</sub> = 6.6 Hz, 4H, OCH<sub>2</sub>), 1.78-1.75 (m, 2H, *CH*<sub>2</sub>), 1.18 (s, 24H, BOCMe<sub>2</sub>). <sup>13</sup>C{<sup>1</sup>H} NMR (151 MHz, CDCl<sub>3</sub>): δ 82.65 (BOCMe<sub>2</sub>), 61.48 (OCH<sub>2</sub>), 33.23 (*CH*<sub>2</sub>), 24.68 (BOCMe<sub>2</sub>). <sup>11</sup>B{<sup>1</sup>H} NMR (193 MHz, CDCl<sub>3</sub>): δ 22.22.

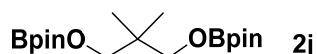

<sup>1</sup>H NMR (CDCl<sub>3</sub>): δ 3.82 (q, *J*<sub>HH</sub> = 4.7, 4H, OCH<sub>2</sub>), 1.17 (s, 24H, BOCMe<sub>2</sub>), 1.14 (s, 6H, *Me*). <sup>13</sup>C{<sup>1</sup>H} NMR (151 MHz, CDCl<sub>3</sub>): δ 82.62 (BOCMe<sub>2</sub>), 70.32 (OCH<sub>2</sub>), 36.70 (*C*(Me)<sub>2</sub>), 24.60 (BOCMe<sub>2</sub>), 20.87 (*Me*). <sup>11</sup>B{<sup>1</sup>H} NMR (193 MHz, CDCl<sub>3</sub>): δ 22.35.

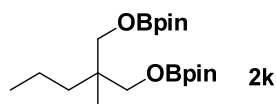

<sup>1</sup>H NMR (CDCl<sub>3</sub>): δ 3.58 (d, <sup>3</sup>*J*<sub>HH</sub> = 8.4 Hz, 4H, OCH<sub>2</sub>), 1.91 (s, 4H, *CH*<sub>2</sub>), 1.17-1.16 (24H, BOCMe<sub>2</sub>, *CH*<sub>2</sub>), 0.79 (t, <sup>3</sup>*J*<sub>HH</sub> = 6.6 Hz, 3H, *CH*<sub>2</sub>Me), 0.75 (s, 3H, *CMe*). <sup>13</sup>C{<sup>1</sup>H} NMR (151 MHz, CDCl<sub>3</sub>): δ 82.46 (BOCMe<sub>2</sub>), 68.71 (OCH<sub>2</sub>), 38.99 (*CMe*), 35.92 (*CCH*<sub>2</sub>), 24.48 (BOCMe<sub>2</sub>), 18.21 (*CMe*), 16.32 (*CH*<sub>2</sub>Me), 14.83 (*CH*<sub>2</sub>Me). <sup>11</sup>B{<sup>1</sup>H} NMR (193 MHz, CDCl<sub>3</sub>): δ 22.24.

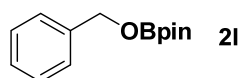

<sup>1</sup>H NMR (CDCl<sub>3</sub>): δ 7.26-7.15 (m, 5H, *Ar-H*), 4.84 (s, 2H, OCH<sub>2</sub>), 1.16 (s, 12H, BOCMe<sub>2</sub>). <sup>13</sup>C{<sup>1</sup>H} NMR (151 MHz, CDCl<sub>3</sub>): δ 139.14, 128.26, 127.20, 126.56 (*Ar-C*),

82.91 (BOCMe<sub>2</sub>), 66.66 (OCH<sub>2</sub>), 24.60 (BOCMe<sub>2</sub>). <sup>11</sup>B{<sup>1</sup>H} NMR (193 MHz, CDCl<sub>3</sub>): δ 22.35.

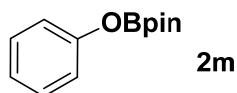

<sup>1</sup>H NMR (CDCl<sub>3</sub>): δ 7.31-7.16 (m, 2H, Ar-H), 7.00-6.94 (m, 3H, Ar-H), 1.19 (s, 12H, BOCMe<sub>2</sub>). <sup>13</sup>C{<sup>1</sup>H} NMR (151 MHz, CDCl<sub>3</sub>): δ 153.46, 129.24, 123.01, 119.48 (Ar-C), 83.43 (BOCMe<sub>2</sub>), 24.58 (BOCMe<sub>2</sub>). <sup>11</sup>B{<sup>1</sup>H} NMR (193 MHz, CDCl<sub>3</sub>): δ 22.23.

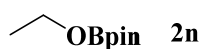

<sup>1</sup>H NMR (CDCl<sub>3</sub>): δ 3.84 (q, <sup>3</sup>J<sub>HH</sub> = 7.2 Hz, 2H, OCH<sub>2</sub>), 1.17 (s, 12H, BOCMe<sub>2</sub>), 1.15 (t, <sup>3</sup>J<sub>HH</sub> = 7.2 Hz, 3H, Me). <sup>13</sup>C{<sup>1</sup>H} NMR (151 MHz, CDCl<sub>3</sub>): δ 82.44 (BOCMe<sub>2</sub>), 60.49 (OCH<sub>2</sub>), 24.50 (BOCMe<sub>2</sub>), 17.11 (Me). <sup>11</sup>B{<sup>1</sup>H} NMR (193 MHz, CDCl<sub>3</sub>): δ 22.07.

#### MeOBpin 2p

<sup>1</sup>H NMR (CDCl<sub>3</sub>): δ 3.46 (s, 3H, Me), 1.18 (s, 12H, BOCMe<sub>2</sub>). <sup>13</sup>C{<sup>1</sup>H} NMR (151 MHz, CDCl<sub>3</sub>): δ 82.72 (BOCMe<sub>2</sub>), 52.54 (Me), 24.53 (BOCMe<sub>2</sub>). <sup>11</sup>B{<sup>1</sup>H} NMR (193 MHz, CDCl<sub>3</sub>): δ 22.24.

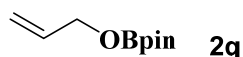

<sup>1</sup>H NMR (CDCl<sub>3</sub>): δ 5.89-5.80 (m, 1H, CH=CH<sub>2</sub>), 5.22-5.02 (m, 2H, CH=CH<sub>2</sub>), 5.05-5.02 (m, 2H, CH<sub>2</sub>), 3.52 (s, 3H, OCH<sub>3</sub>), 1.17 (s, 24H, BOCMe<sub>2</sub>). <sup>13</sup>C{<sup>1</sup>H} NMR (151 MHz, CDCl<sub>3</sub>): δ 135.35 (CH=CH<sub>2</sub>), 114.88 (CH=CH<sub>2</sub>), 82.74, 82.67 (BOCMe<sub>2</sub>), 76.75 (CH), 65.44 (OCH<sub>2</sub>), 24.54, 24.48 (BOCMe<sub>2</sub>). <sup>11</sup>B{<sup>1</sup>H} NMR (193 MHz, CDCl<sub>3</sub>): δ 22.23.

## A Typical Procedure for the Synthesis of Boronate Esters and Their Hydrolysis to Alcohols

Catalyst **1** (1% mol), 4-ethyl-1,3-dioxolan-2-one (**2c**, 0.40 mmol) and HBpin (1.3 mmol) were placed in an oven-dried 10 ml Schlenk tube. The mixture was stirred at 25 °C for 6 h, and then subjected to NMR analysis. The crude product was purified by flash column chromatography on silica gel with acetate/hexane (1/4) as eluents to give the alcohol, 1, 2-butanediol (34 mg, 0.38 mmol, 94% yield).

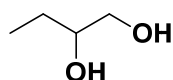

$^1\text{H}$  NMR ( $\text{CDCl}_3$ ):  $\delta$  4.11 (s, 1H,  $\text{CHOH}$ ), 4.01 (s, 1H,  $\text{CH}_2\text{OH}$ ), 3.61 (d,  $^3J_{\text{HH}} = 10.2$  Hz, 2H,  $\text{CH}_2\text{OH}$ ), 3.43-3.40 (m, 1 H,  $\text{CHOH}$ ), 1.48-1.43 (m, 2H,  $\text{CH}_2\text{Me}$ ), 0.95 (t,  $^3J_{\text{HH}} = 7.8$  Hz, 3H,  $\text{CH}_2\text{Me}$ ).  $^{13}\text{C}\{^1\text{H}\}$  NMR (101 MHz,  $\text{CDCl}_3$ ):  $\delta$  73.77 ( $\text{CHOH}$ ), 66.31 ( $\text{CH}_2\text{OH}$ ), 26.03 ( $\text{CH}_2\text{Me}$ ), 9.90 ( $\text{CH}_2\text{Me}$ ).

Catalyst **1** (1% mol), 4-(hydroxymethyl)-1,3-dioxolan-2-one (**2f**, 0.40 mmol) and HBpin (1.68 mmol) were placed in an oven-dried 10 ml Schlenk tube. The mixture was stirred at 25 °C for 6 h, and then subjected to NMR analysis. The crude product was hydrolyzed with 6 M HCl (10 ml). The aqueous phase was washed with diethyl ether (3 x 10 ml) and the combined organic phases were washed with water (10 ml). The combined organic phases were concentrated and the crude product was purified by flash chromatography ( $\text{SiO}_2$ ,  $\text{DCM}:\text{MeOH}$  9:1–2:1). The product was obtained as a colourless, viscous oil (92% yield).

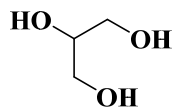

$^1\text{H}$  NMR ( $\text{D}_2\text{O}$ ):  $\delta$  3.71 (ddd,  $J_{\text{HH}} = 10.8$ , 1 H,  $\text{CHOH}$ ), 3.56 (dd,  $J_{\text{HH}} = 11.4$ , 2H,  $\text{CH}_2\text{OH}$ ), 3.45 (d,  $^3J_{\text{HH}} = 11.2$  Hz, 2 H,  $\text{CH}_2\text{OH}$ ).  $^{13}\text{C}\{^1\text{H}\}$  NMR (101 MHz,  $\text{D}_2\text{O}$ ):  $\delta$  72.03, 62.4.

**Table S1. Optimization of Esters Hydroboration**

$$\text{CH}_3\text{CO}_2\text{CH}_2\text{CH}_3 + 2 \text{HBpin} \xrightarrow[\text{rt}]{\text{Mg(I) 1}} 2 \text{CH}_3\text{CH}_2\text{OH} + \text{BpinOCH}_2\text{CH}_3$$

| Entry | Cat      | Cat. Loading<br>(mol%) | Sol                           | Time<br>(h) | Yield <sup>a</sup><br>(%) |
|-------|----------|------------------------|-------------------------------|-------------|---------------------------|
| 1     | -        | -                      | C <sub>6</sub> D <sub>6</sub> | 1           | 0                         |
| 2     | -        | -                      | C <sub>6</sub> D <sub>6</sub> | 15          | 0 <sup>b</sup>            |
| 3     | <b>1</b> | 5                      | C <sub>6</sub> D <sub>6</sub> | <0.17       | 99                        |
| 4     | <b>1</b> | 1                      | C <sub>6</sub> D <sub>6</sub> | 0.67        | 99                        |
| 5     | <b>1</b> | 1                      | -                             | 1           | 99                        |
| 6     | <b>1</b> | 0.1                    | -                             | 3           | 77                        |
| 7     | <b>1</b> | 0.1                    | -                             | 5           | 99                        |

<sup>a</sup>The reaction was monitored by <sup>1</sup>H NMR spectroscopy. <sup>b</sup>70 °C.

**General Procedure for Hydroboration of Esters.** In a glove box, catalyst **1** (1 mol%) was added to a solution of esters (1.0 mmol) and HBpin (2.0 mmol) in a 10 ml Schlenk flask. The reaction mixture was stirred at 25 °C for 1 h, and then subjected to NMR analysis. The progress of the reaction was monitored by <sup>1</sup>H NMR, <sup>13</sup>C NMR, and <sup>11</sup>B NMR, which indicated the completion of the reaction by the disappearance of the ester proton and appearance of new products.

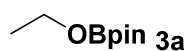

<sup>1</sup>H NMR (CDCl<sub>3</sub>): δ 3.89 (q, <sup>3</sup>J<sub>HH</sub> = 7.2 Hz, 2H, MeCH<sub>2</sub>OBpin), 1.23 (t, <sup>3</sup>J<sub>HH</sub> = 7.2 Hz, 3H, MeCH<sub>2</sub>OBpin), 1.20 (s, 12H, BOCMe<sub>2</sub>). <sup>13</sup>C{<sup>1</sup>H} NMR (151 MHz, CDCl<sub>3</sub>): δ 82.36 (BOCMe<sub>2</sub>), 60.69 (MeCH<sub>2</sub>OBpin), 24.74 (BOCMe<sub>2</sub>), 17.52 (MeCH<sub>2</sub>OBpin). <sup>11</sup>B{<sup>1</sup>H} NMR (193 MHz, CDCl<sub>3</sub>): δ 22.48.

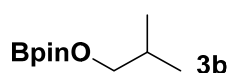

<sup>1</sup>H NMR (C<sub>6</sub>D<sub>6</sub>): δ 3.69 (d, <sup>3</sup>J<sub>HH</sub> = 6.6 Hz, 2H, CH<sub>2</sub>OBpin), 1.77 (d, <sup>3</sup>J<sub>HH</sub> = 6.6 Hz, CHMe<sub>2</sub>), 1.07 (s, 12H, BOCMe<sub>2</sub>), 0.83 (d, <sup>3</sup>J<sub>HH</sub> = 6.6 Hz, 6H, CHMe<sub>2</sub>). <sup>13</sup>C{<sup>1</sup>H} NMR

(151 MHz, C<sub>6</sub>D<sub>6</sub>):  $\delta$  82.36 (BOCMe<sub>2</sub>), 71.52 (CH<sub>2</sub>OBpin), 30.31 (CHMe<sub>2</sub>), 24.75 (BOCMe<sub>2</sub>), 18.95 (CHMe<sub>2</sub>). <sup>11</sup>B{<sup>1</sup>H} NMR (193 MHz, C<sub>6</sub>D<sub>6</sub>):  $\delta$  22.51.

**Br-(CH<sub>2</sub>)<sub>5</sub>-OBpin 3c**

<sup>1</sup>H NMR (C<sub>6</sub>D<sub>6</sub>):  $\delta$  3.84 (t, <sup>3</sup>J<sub>HH</sub> = 7.2 Hz, 2H, CH<sub>2</sub>OBpin), 2.92 (t, <sup>3</sup>J<sub>HH</sub> = 7.2 Hz, 2H, (CH<sub>2</sub>)<sub>5</sub>), 1.46-1.37 (m, 6H, (CH<sub>2</sub>)<sub>5</sub>), 1.10-1.09 (m, 2H, (CH<sub>2</sub>)<sub>5</sub>), 1.07 (s, 12H, BOCMe<sub>2</sub>). <sup>13</sup>C{<sup>1</sup>H} NMR (151 MHz, C<sub>6</sub>D<sub>6</sub>):  $\delta$  82.35 (BOCMe<sub>2</sub>), 64.84 (CH<sub>2</sub>OBpin), 33.58, 32.99, 31.69, 28.02, 25.11 ((CH<sub>2</sub>)<sub>5</sub>), 24.96 (BOCMe<sub>2</sub>). <sup>11</sup>B{<sup>1</sup>H} NMR (193 MHz, C<sub>6</sub>D<sub>6</sub>):  $\delta$  22.50.

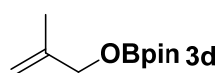

<sup>1</sup>H NMR (C<sub>6</sub>D<sub>6</sub>):  $\delta$  5.12 (s, 1H, C=CH<sub>2</sub>), 4.80-4.79 (m, C=CH<sub>2</sub>), 4.30 (s, 2 H, CH<sub>2</sub>OBpin), 1.55 (s, 3 H, MeC=CH<sub>2</sub>), 1.05 (s, 12 H, BOCMe<sub>2</sub>). <sup>13</sup>C{<sup>1</sup>H} NMR (151 MHz, C<sub>6</sub>D<sub>6</sub>):  $\delta$  143.31 (C=CH<sub>2</sub>), 110.14 (C=CH<sub>2</sub>), 83.16 (BOCMe<sub>2</sub>), 68.49 (CH<sub>2</sub>OBpin), 24.95, 24.74 (BOCMe<sub>2</sub>). <sup>11</sup>B{<sup>1</sup>H} NMR (193 MHz, C<sub>6</sub>D<sub>6</sub>):  $\delta$  22.66.

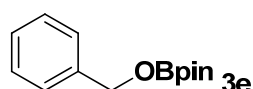

<sup>1</sup>H NMR (C<sub>6</sub>D<sub>6</sub>):  $\delta$  7.30 (d, <sup>3</sup>J<sub>HH</sub> = 7.2 Hz, 2H, Ar-H), 7.13 (t, <sup>3</sup>J<sub>HH</sub> = 7.2 Hz, 2H, Ar-H), 7.05 (t, <sup>3</sup>J<sub>HH</sub> = 7.2 Hz, 1H, Ar-H), 4.94 (s, 2H, CH<sub>2</sub>OBpin), 1.04 (s, 12H, BOCMe<sub>2</sub>). <sup>13</sup>C{<sup>1</sup>H} NMR (151 MHz, C<sub>6</sub>D<sub>6</sub>):  $\delta$  140.04, 130.02, 128.76, 128.58, 127.57, 127.04 (Ar-C), 82.75 (BOCMe<sub>2</sub>), 66.94 (CH<sub>2</sub>OBpin), 24.70 (BOCMe<sub>2</sub>). <sup>11</sup>B{<sup>1</sup>H} NMR (193 MHz, C<sub>6</sub>D<sub>6</sub>):  $\delta$  22.75.

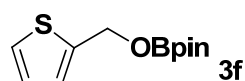

<sup>1</sup>H NMR (C<sub>6</sub>D<sub>6</sub>):  $\delta$  6.91-6.85 (m, 1H, C<sub>4</sub>H<sub>3</sub>S), 6.82-6.81 (m, 1H, C<sub>4</sub>H<sub>3</sub>S), 6.68-6.66 (m, 1H, C<sub>4</sub>H<sub>3</sub>S), 5.00 (s, 1H, CH<sub>2</sub>OBpin), 1.04 (s, 12H, BOCMe<sub>2</sub>). <sup>13</sup>C{<sup>1</sup>H} NMR (175 MHz, C<sub>6</sub>D<sub>6</sub>):  $\delta$  142.80, 126.76, 126.08, 125.67 (C<sub>4</sub>H<sub>3</sub>S), 82.91 (BOCMe<sub>2</sub>), 61.84 (CH<sub>2</sub>OBpin), 24.70 (BOCMe<sub>2</sub>). <sup>11</sup>B{<sup>1</sup>H} NMR (193 MHz, C<sub>6</sub>D<sub>6</sub>):  $\delta$  22.51.



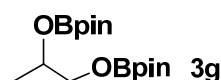

$^1\text{H}$  NMR ( $\text{C}_6\text{D}_6$ ):  $\delta$  4.45-4.42 (m, 1H, MeCH), 3.80 (d,  $^3J_{\text{HH}} = 6.0$  Hz, 2H,  $\text{CH}_2\text{OBpin}$ ), 1.10, 1.07 (s, 12H,  $\text{BOCMe}_2$ ), 1.05-1.04 (m, 3H, MeCH).  $^{13}\text{C}\{^1\text{H}\}$  NMR (151 MHz,  $\text{C}_6\text{D}_6$ ):  $\delta$  82.59, 82.44 ( $\text{BOCMe}_2$ ), 70.72 (MeCH), 69.56 ( $\text{CH}_2\text{OBpin}$ ), 24.81, 24.78, 24.74, 24.67 ( $\text{BOCMe}_2$ ), 18.59 (MeCH).  $^{11}\text{B}\{^1\text{H}\}$  NMR (193 MHz,  $\text{C}_6\text{D}_6$ ):  $\delta$  22.24.

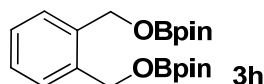

$^1\text{H}$  NMR ( $\text{C}_6\text{D}_6$ ):  $\delta$  7.51-7.49 (m, 2H, Ar-H), 7.10-7.07 (m, 2H, Ar-H), 5.06 (s, 4H, Ar- $\text{CH}_2\text{OBpin}$ ), 1.03 (s, 24H,  $\text{BOCMe}_2$ ).  $^{13}\text{C}\{^1\text{H}\}$  NMR (151 MHz,  $\text{C}_6\text{D}_6$ ):  $\delta$  137.31, 127.80, 127.74 (Ar-C), 82.73 ( $\text{BOCMe}_2$ ), 64.52 (Ar- $\text{CH}_2\text{OBpin}$ ), 24.69 ( $\text{BOCMe}_2$ ).  $^{11}\text{B}\{^1\text{H}\}$  NMR (193 MHz,  $\text{C}_6\text{D}_6$ ):  $\delta$  22.51.

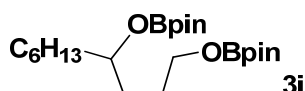

$^1\text{H}$  NMR ( $\text{C}_6\text{D}_6$ ):  $\delta$  4.22-4.18 (m, 1H,  $\text{CHCH}_2\text{CH}_2\text{CH}_2$ ), 3.97-3.93 (m, 2H,  $\text{CHCH}_2\text{CH}_2\text{CH}_2$ ), 1.80-1.66 (m, 2H,  $\text{CHCH}_2\text{CH}_2\text{CH}_2$ ), 1.58-1.55 (m, 2H,  $\text{CHCH}_2\text{CH}_2\text{CH}_2$ ), 1.36-1.33 (m, 2H,  $\text{C}_6\text{H}_{13}$ ), 1.26-1.17 (m, 8H,  $\text{C}_6\text{H}_{13}$ ), 1.07, 1.06 (s, 12H,  $\text{BOCMe}_2$ ), 0.86 (t,  $^3J_{\text{HH}} = 7.2$  Hz, 3 H,  $\text{C}_6\text{H}_{13}$ ).  $^{13}\text{C}\{^1\text{H}\}$  NMR (151 MHz,  $\text{C}_6\text{D}_6$ ):  $\delta$  82.38, 82.22 ( $\text{BOCMe}_2$ ), 65.02 ( $\text{CHCH}_2\text{CH}_2\text{CH}_2$ ), 37.06 ( $\text{CHCH}_2\text{CH}_2\text{CH}_2$ ), 33.12 ( $\text{CHCH}_2\text{CH}_2\text{CH}_2$ ), 32.28 ( $\text{CHCH}_2\text{CH}_2\text{CH}_2$ ), 29.62, 28.20, 25.94, 24.75 ( $\text{C}_6\text{H}_{13}$ ), 24.70, 24.66 ( $\text{BOCMe}_2$ ), 23.06, 14.36 ( $\text{C}_6\text{H}_{13}$ ).  $^{11}\text{B}\{^1\text{H}\}$  NMR (193 MHz,  $\text{C}_6\text{D}_6$ ):  $\delta$  22.29.

### General Procedure for Hydroboration of $\text{CO}_2$

In a glove box, an oven-dried 10 ml Schlenk flask charged with mesitylene (0.50 mmol), HBpin (0.50 mmol) and catalyst **1** (5% mmol) was evacuated and refilled with  $\text{CO}_2$  gas (1 atm) for three cycles, The resulting mixture was stirring at 100 °C for 15 h, and then subjected to NMR analysis.

### Scheme S1: Mechanistic control experiments

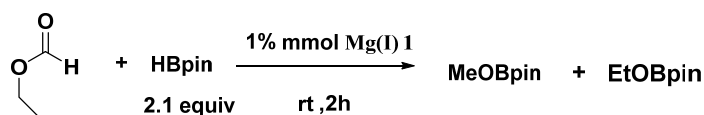

**A: Mg(I) 1 (1% mmol): 99% conv.**

**B: No catalyst: trace**

When a reaction of ethyl formate, postulated as an intermediate, was carried out with Mg(I)-HBpin catalytic system, the usually observed reaction products were present in the crude mixture (A). Without the catalyst **1**, however, the reduction does not proceed, as unreacted starting material and HBpin were still present in the reaction mixture, and no conversion was observed (B). These results suggest that the presence of active Mg(I) species is required for the reaction to take place in each catalytic cycle.

$^1\text{H}$ ,  $^{13}\text{C}$  and  $^{11}\text{B}$  NMR Spectra [MeOBpin (\*), excess HBpin ( $\nabla$ )]

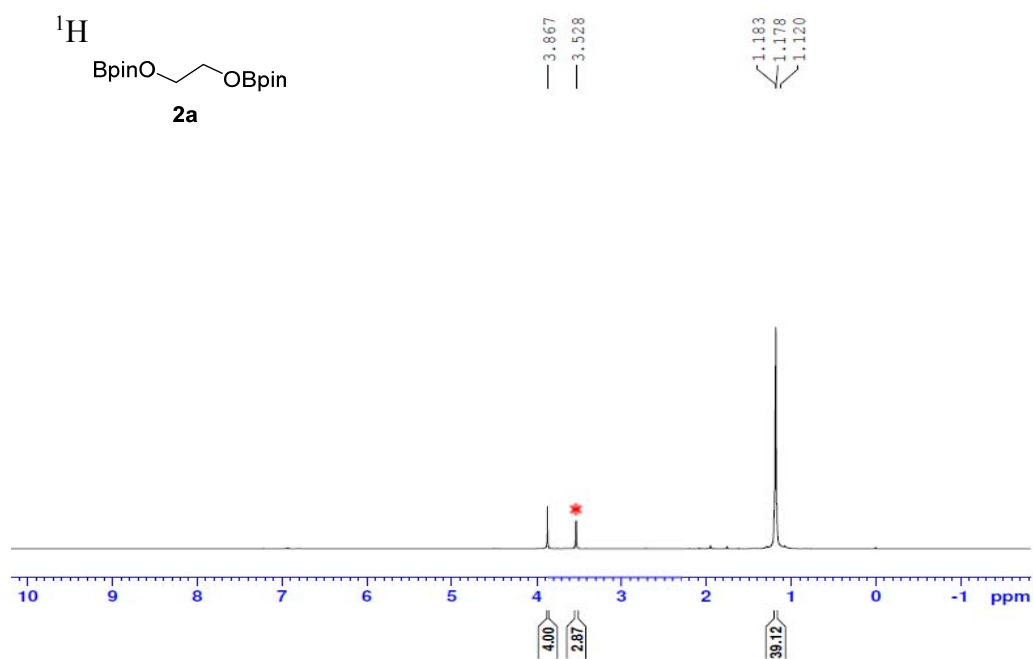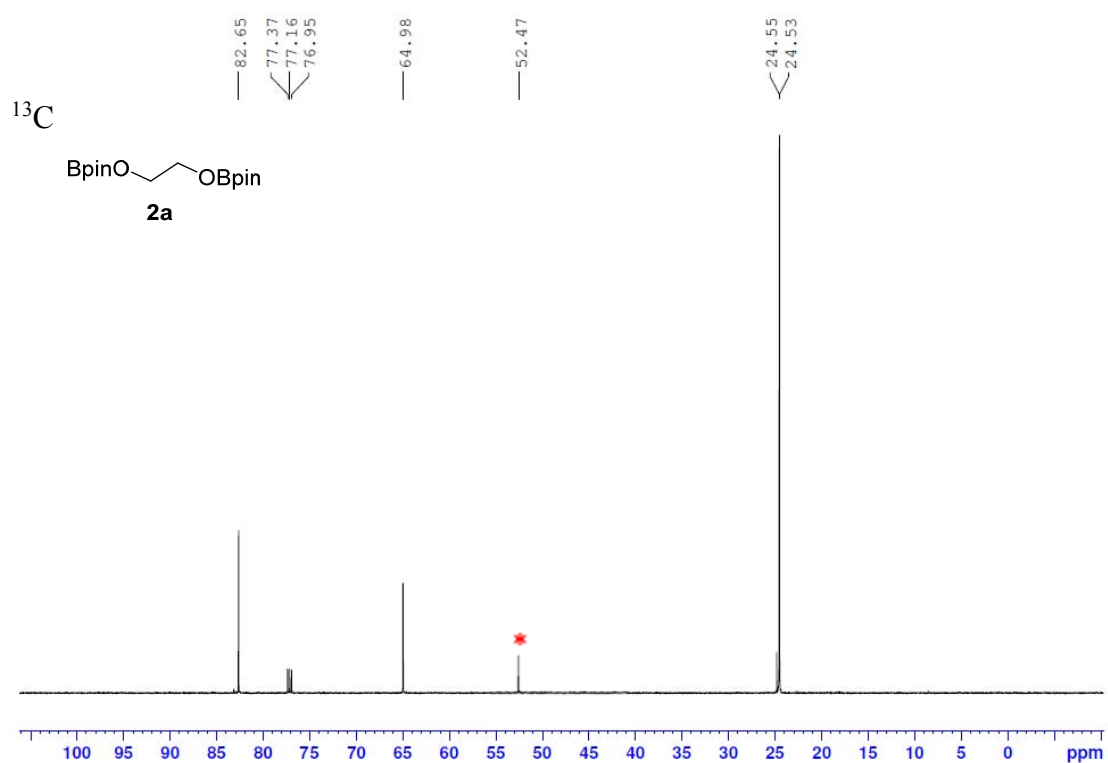

$^{11}\text{B}$

—22.24

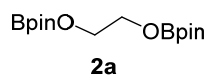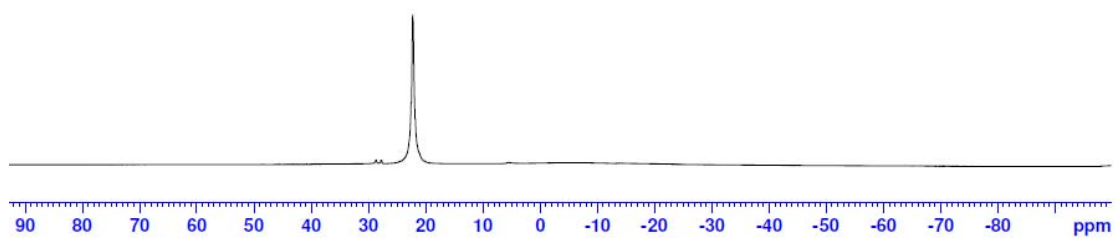

$^1\text{H}$

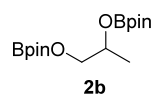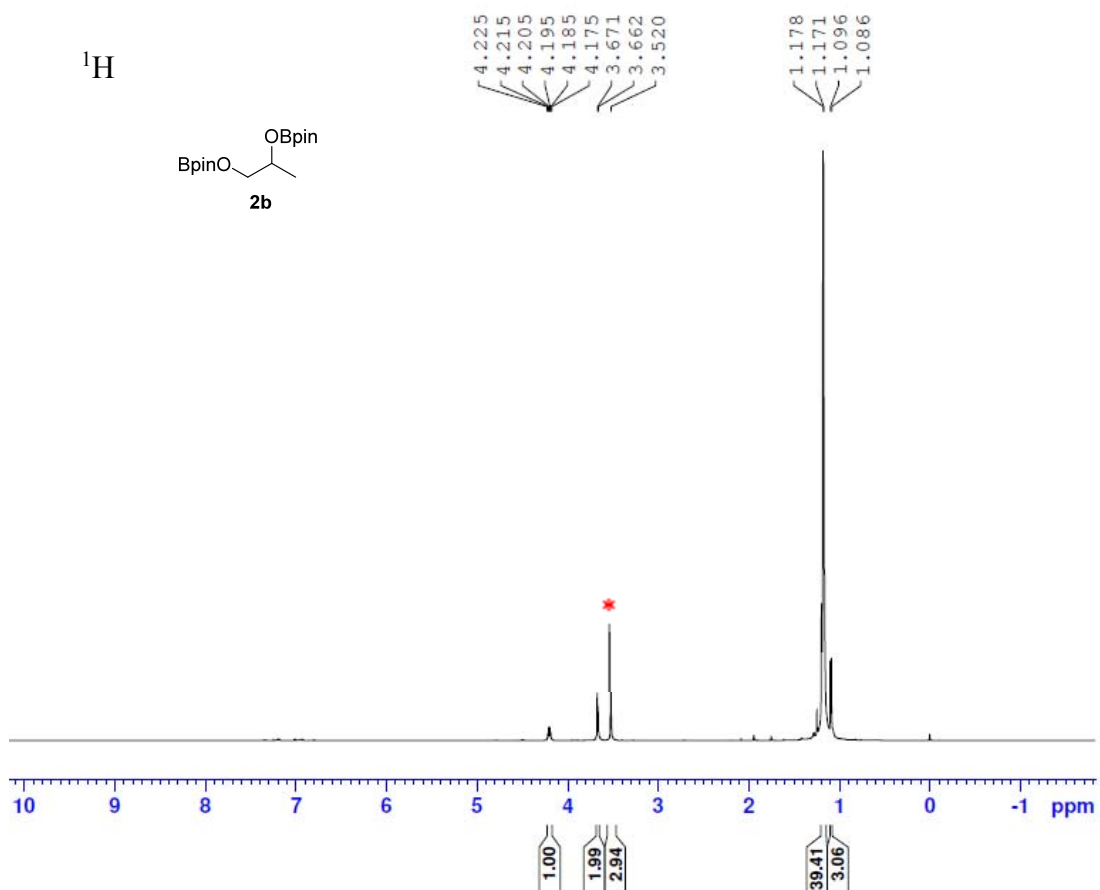

$^{13}\text{C}$

82.66  
82.62  
82.49  
77.29  
77.08  
76.87  
70.27  
69.06  
— 52.49  
24.56  
24.54  
24.49  
24.48  
— 18.41

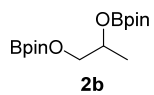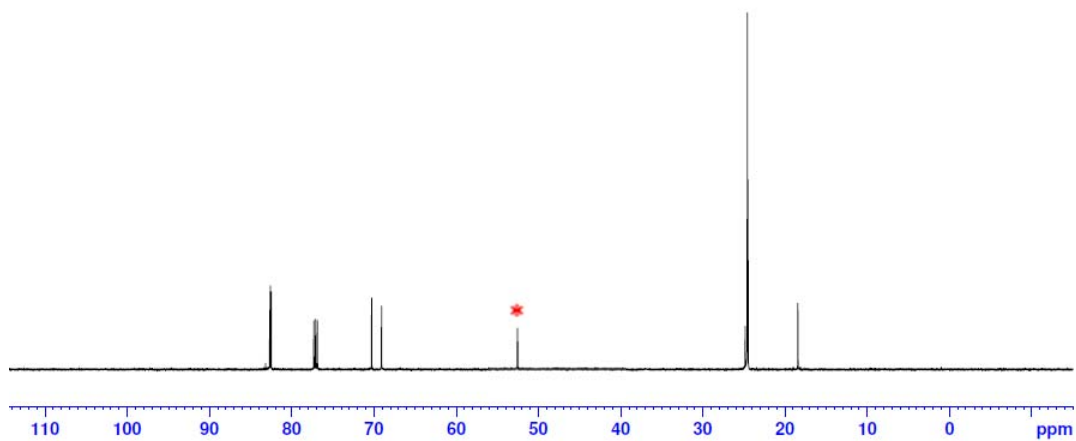

$^{11}\text{B}$

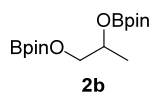

— 22.22

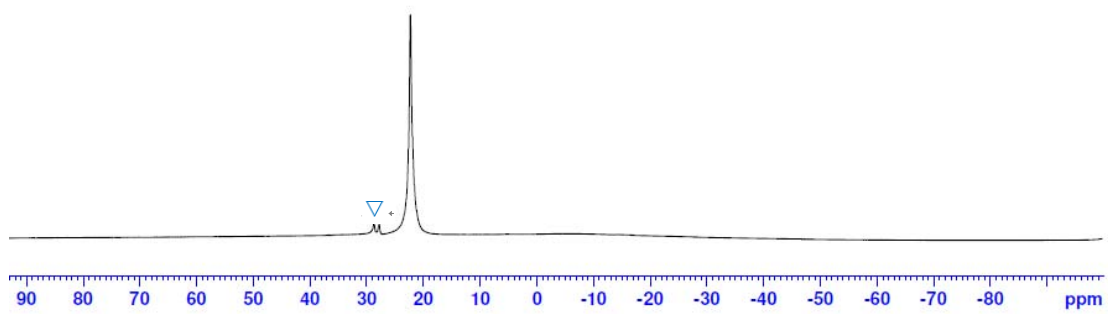

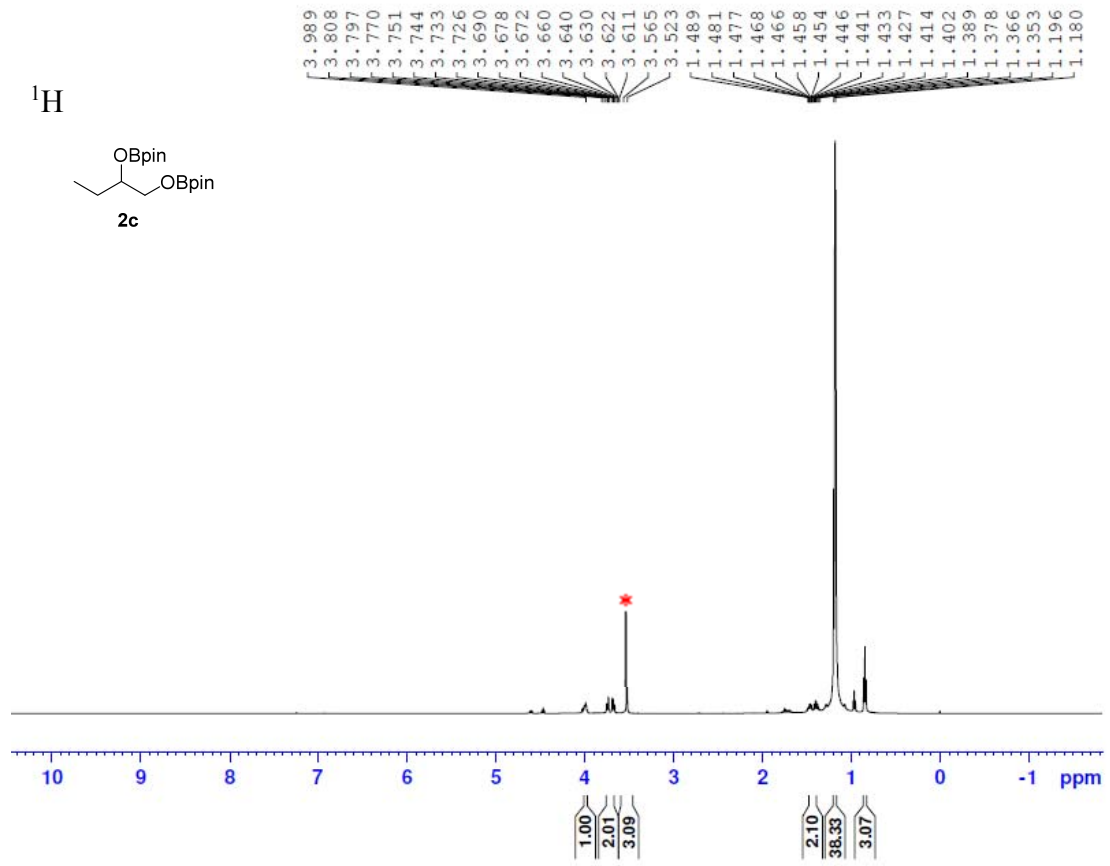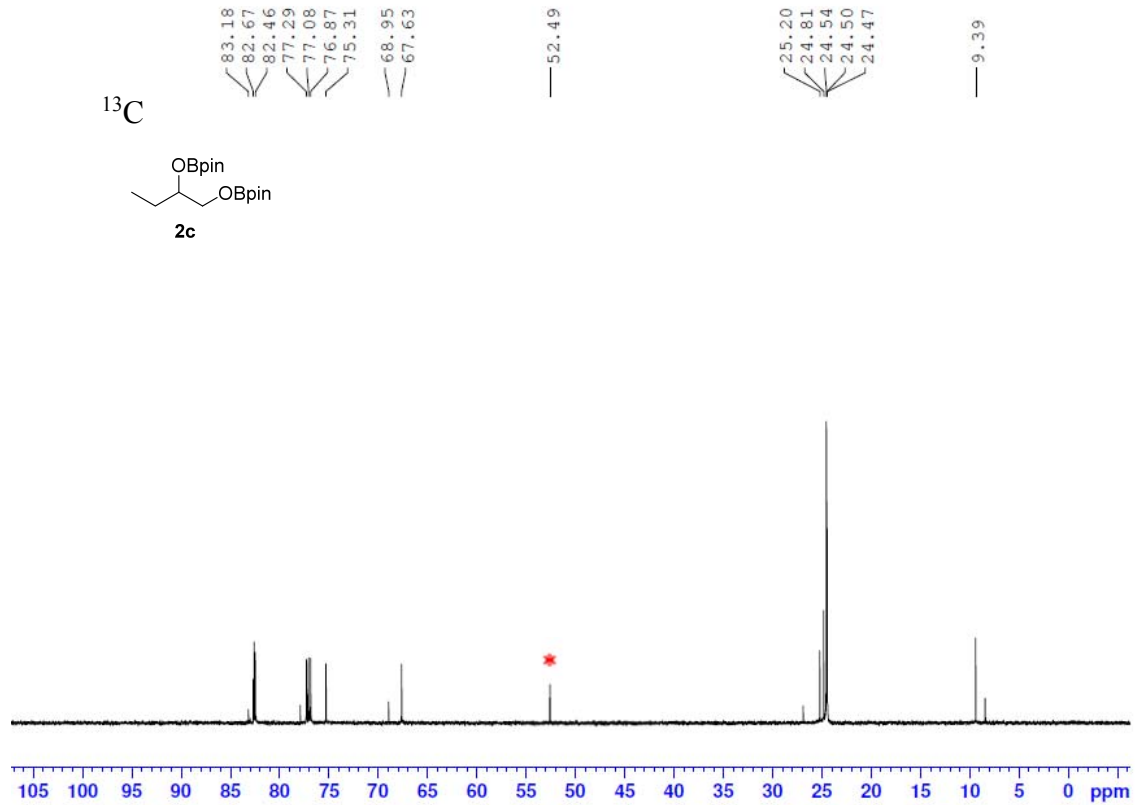

$^{11}\text{B}$

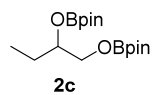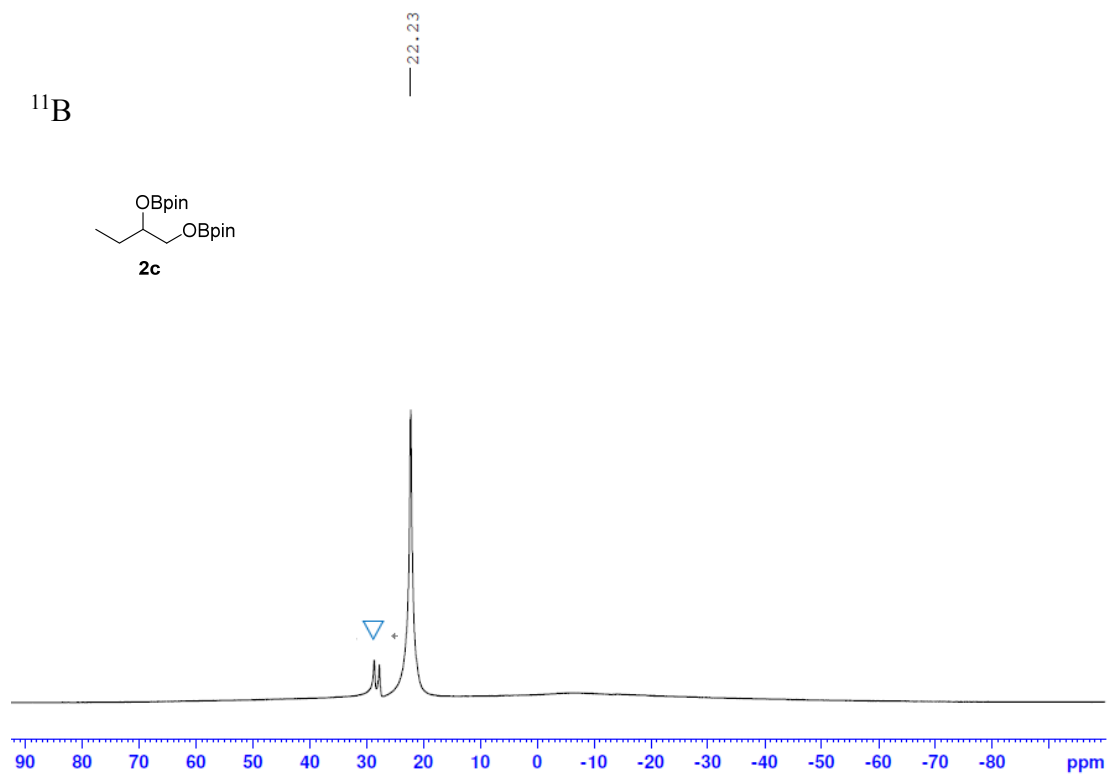

$^1\text{H}$

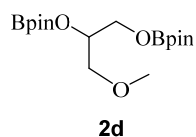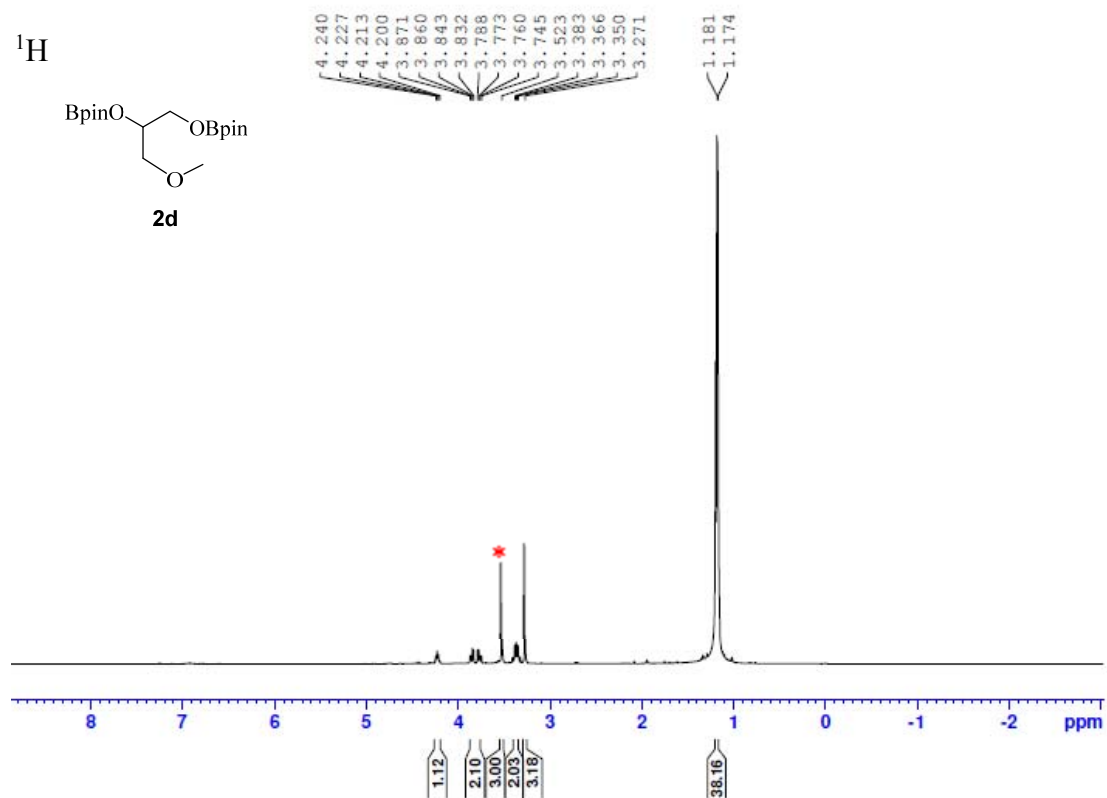

<sup>13</sup>C

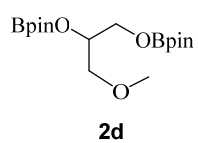



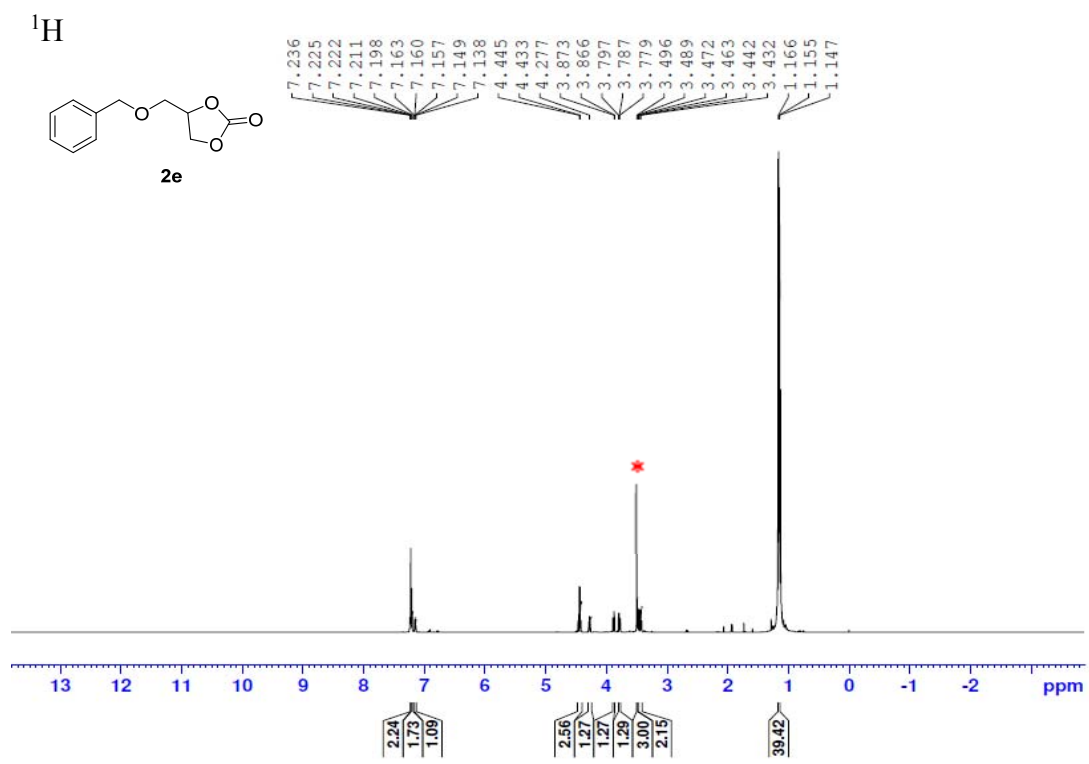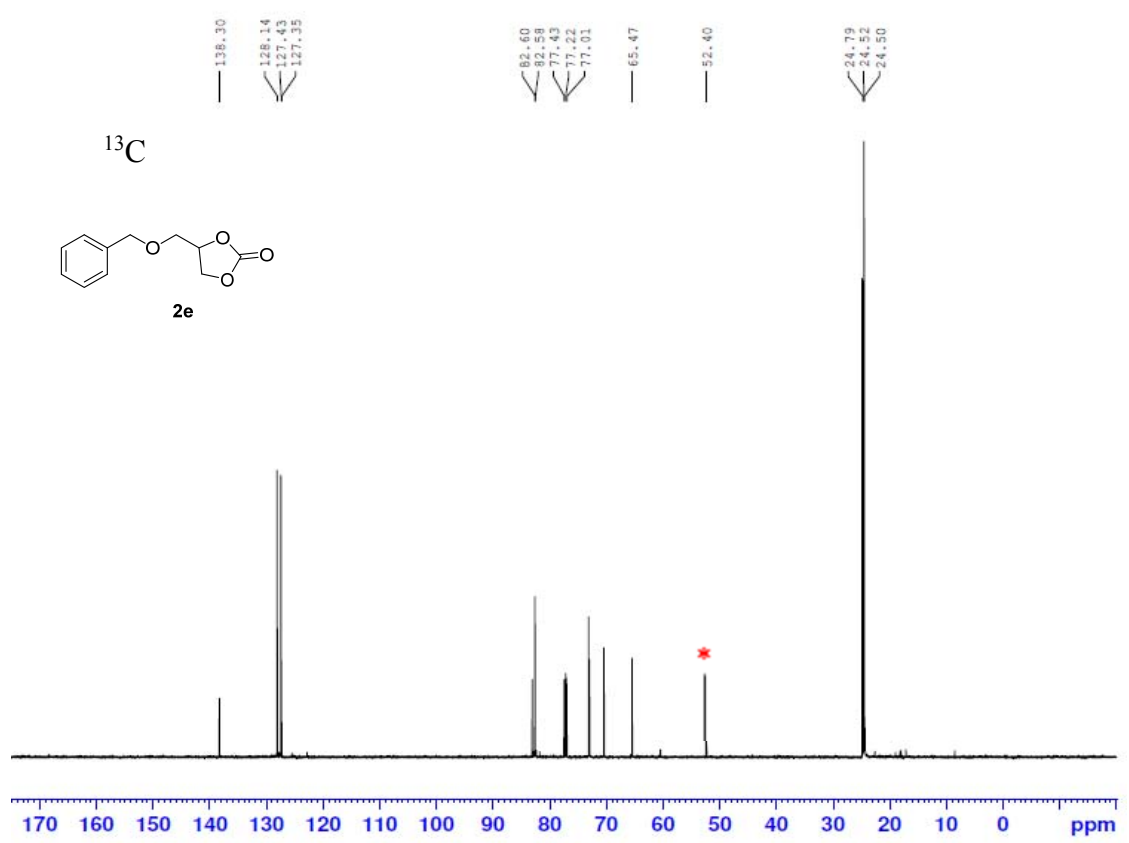

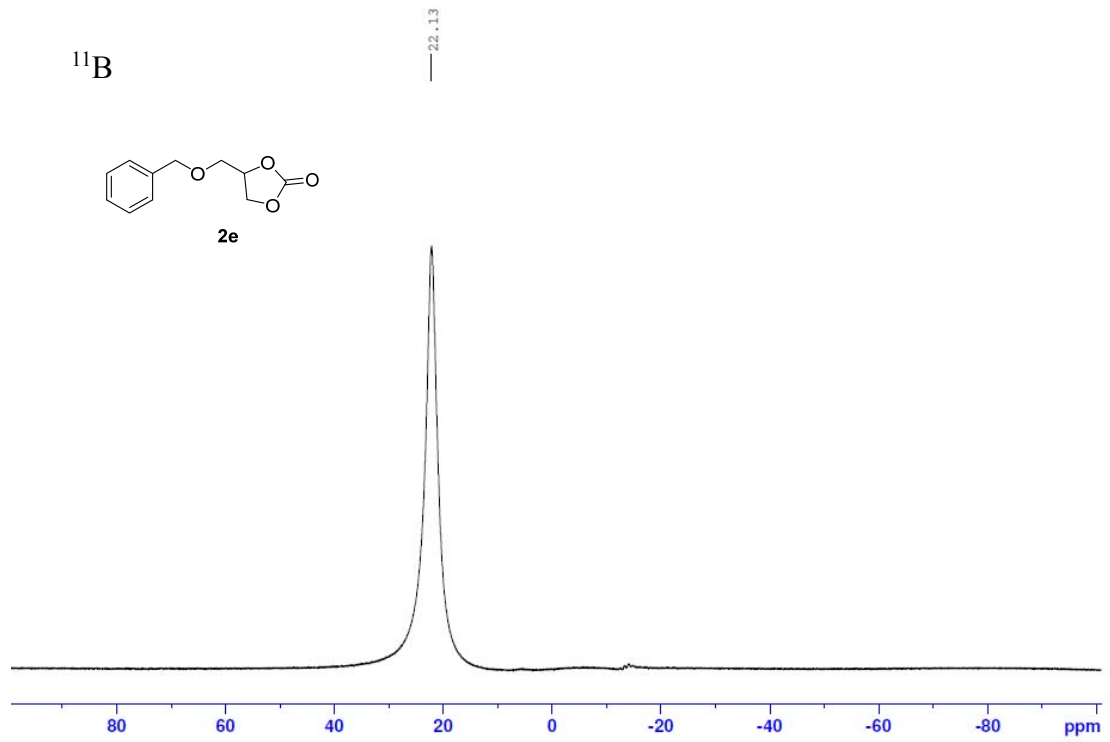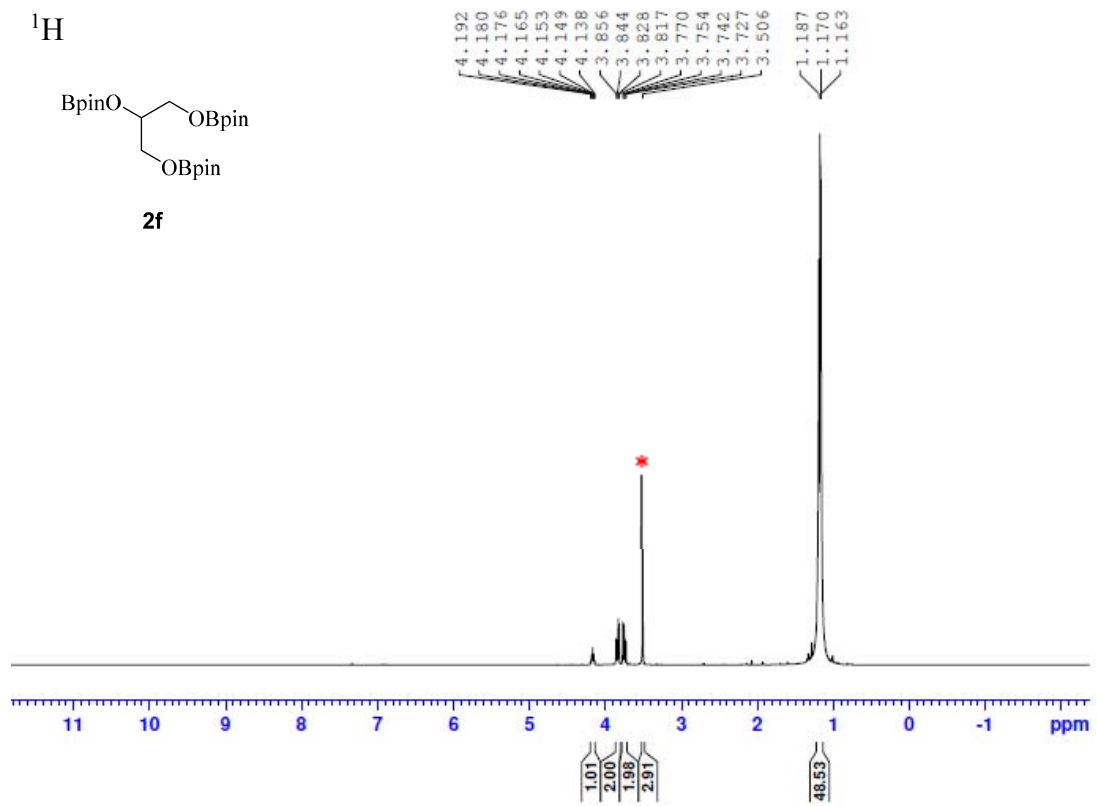

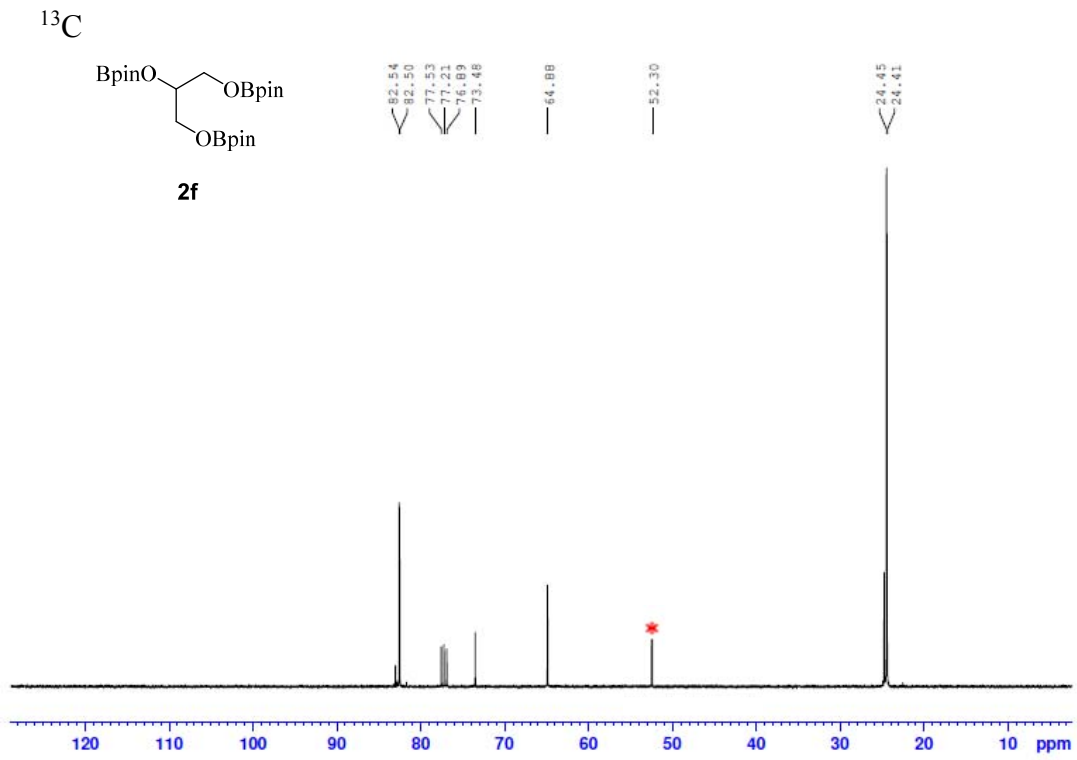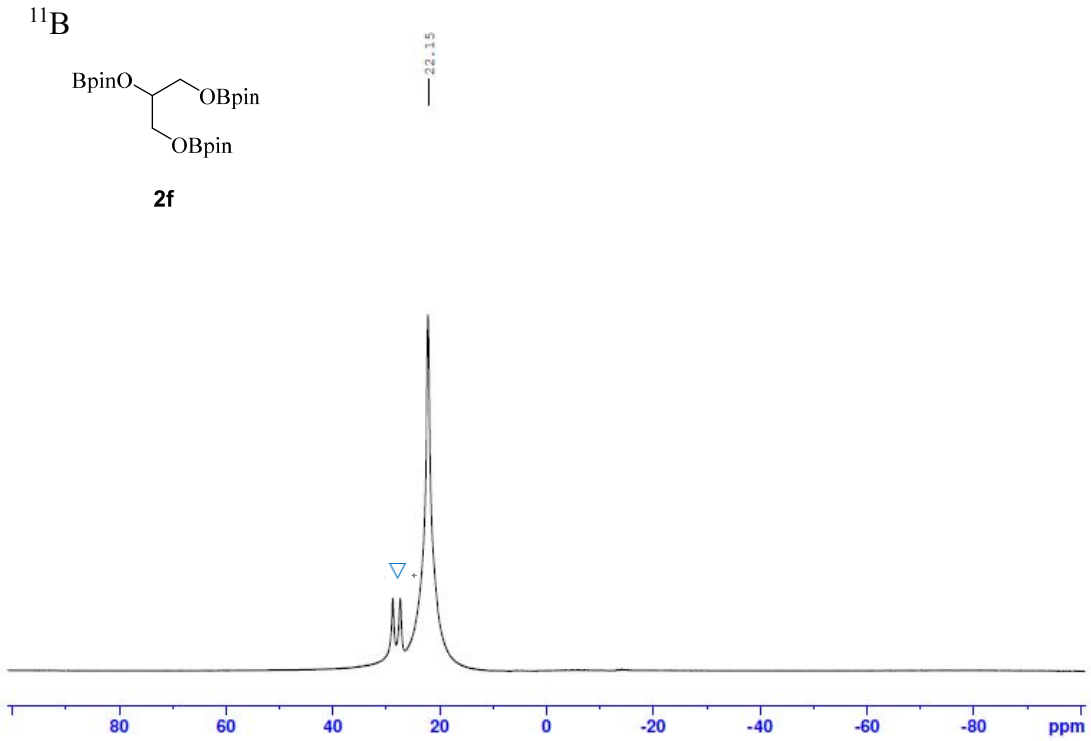

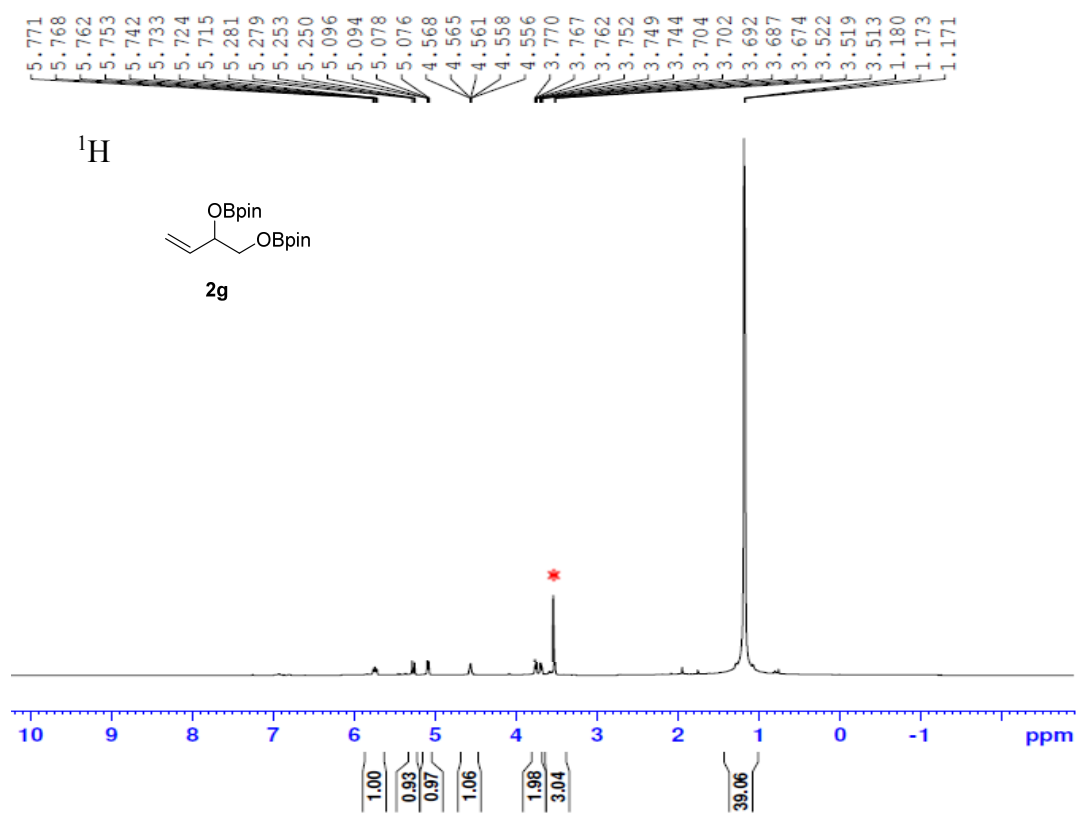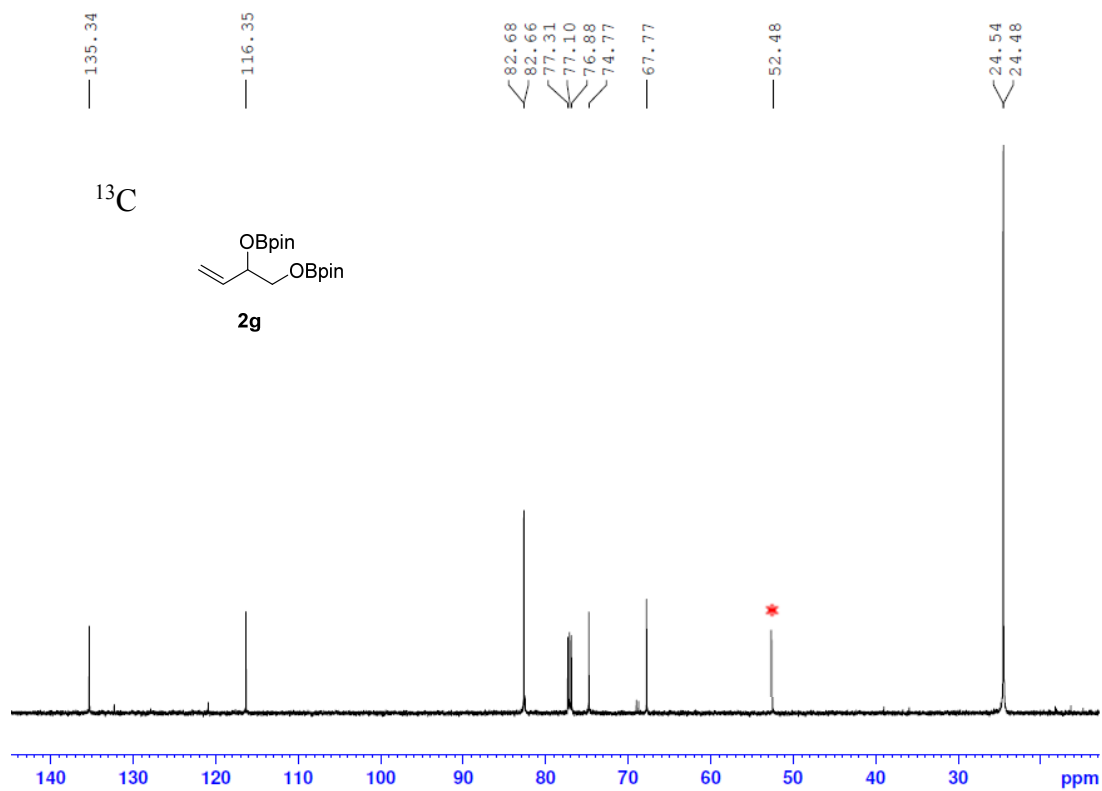

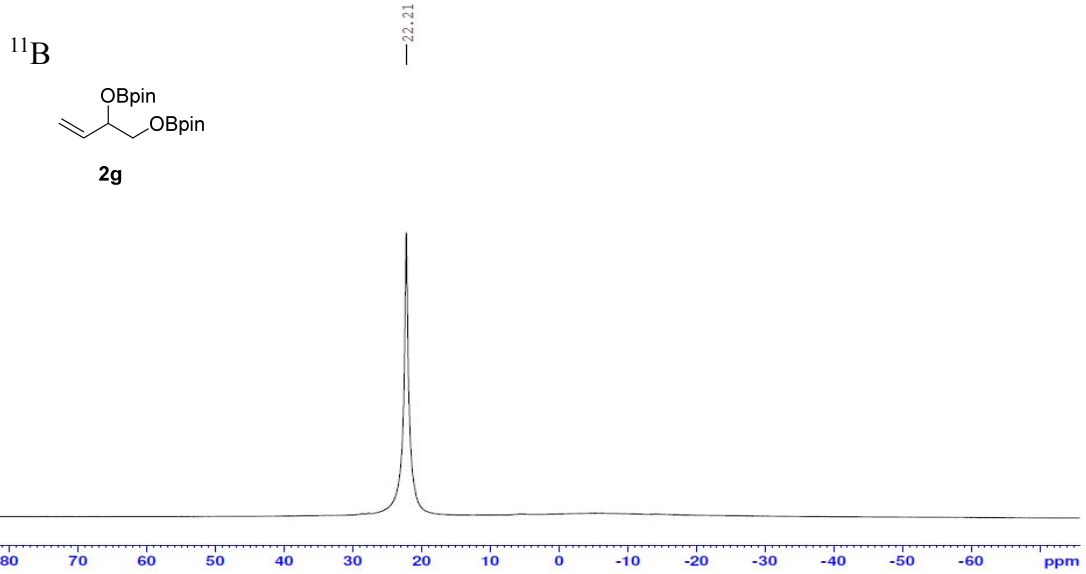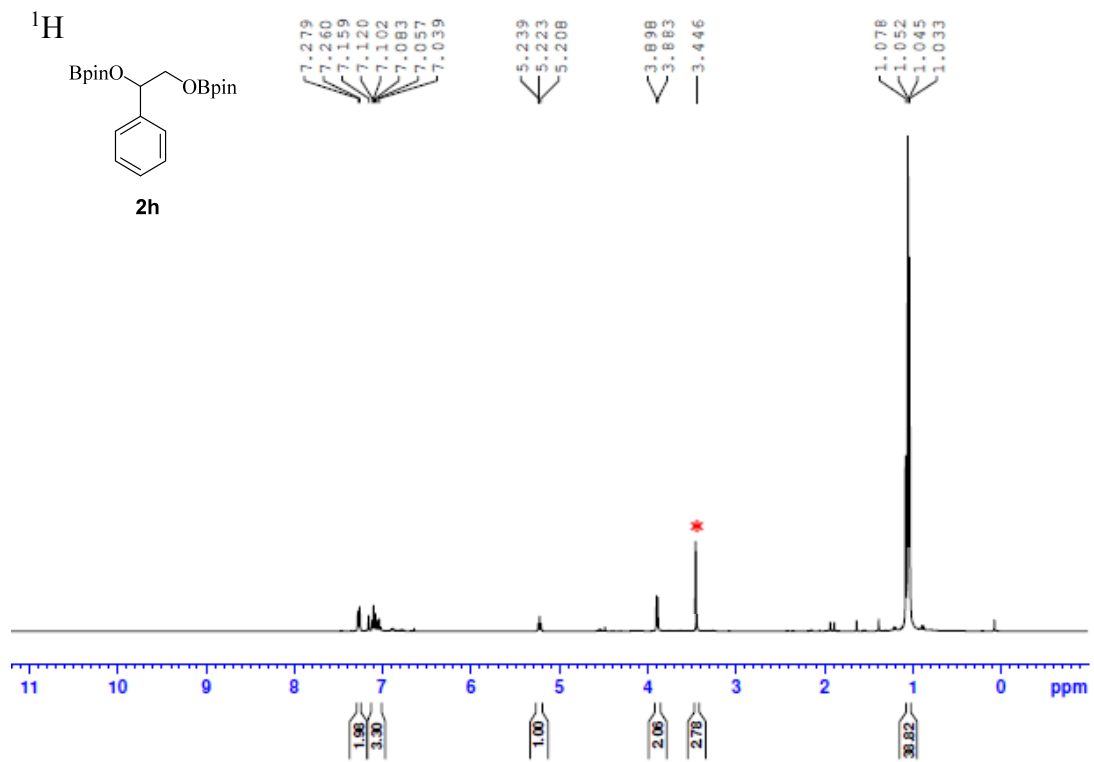

<sup>13</sup>C

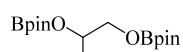

2h

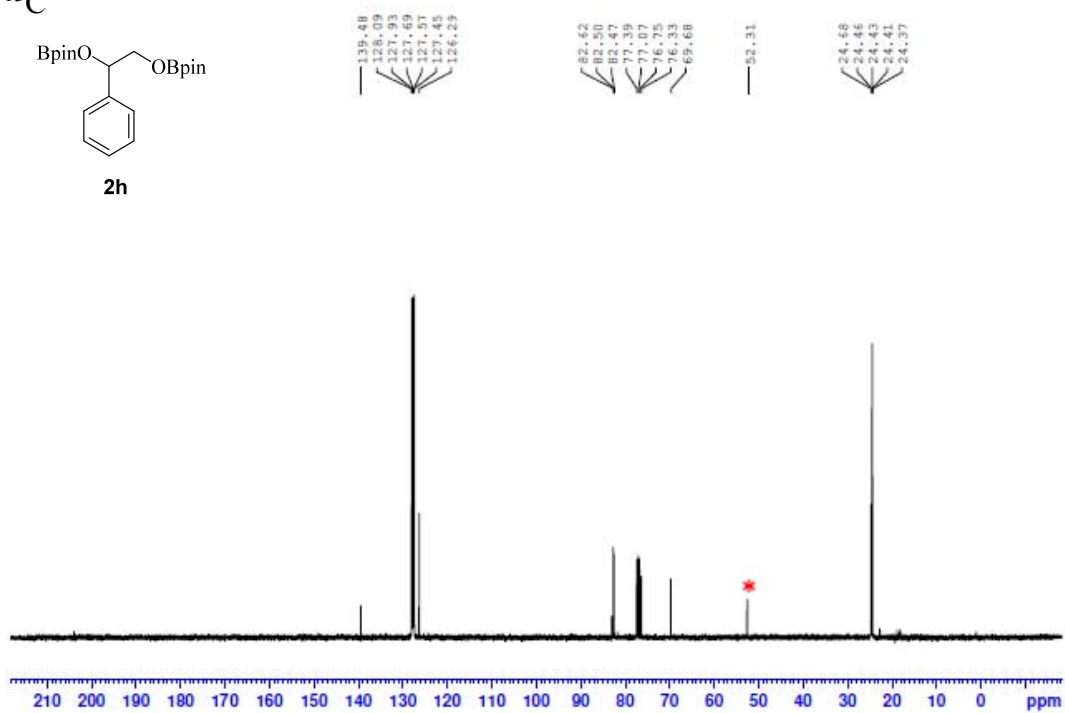

<sup>11</sup>B

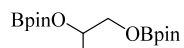

2h

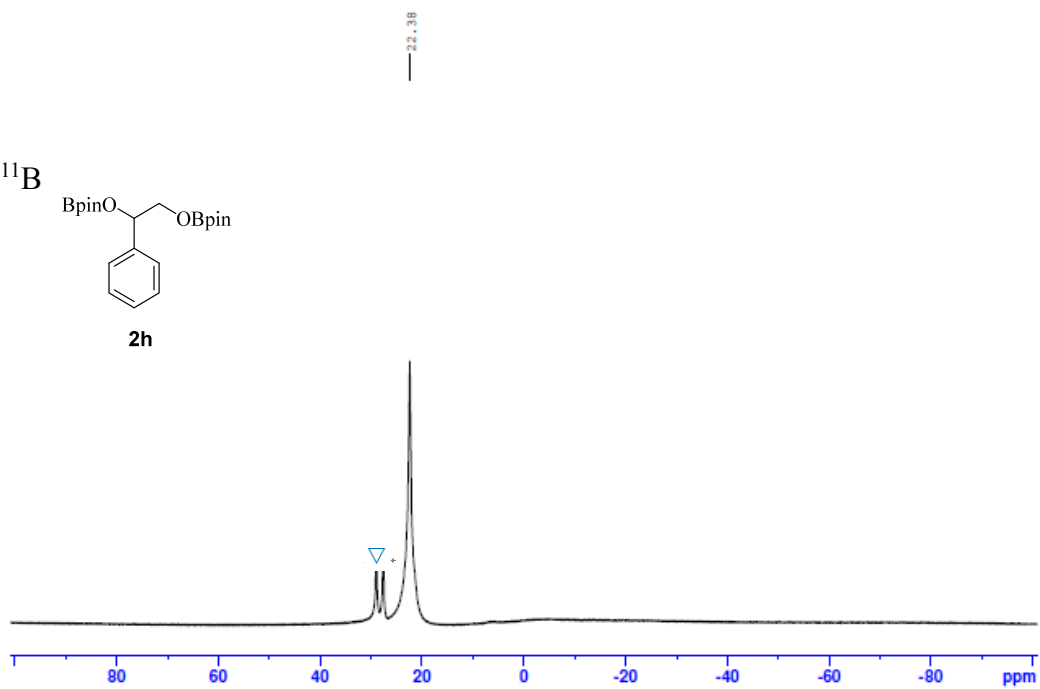

<sup>1</sup>H

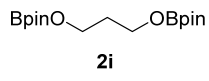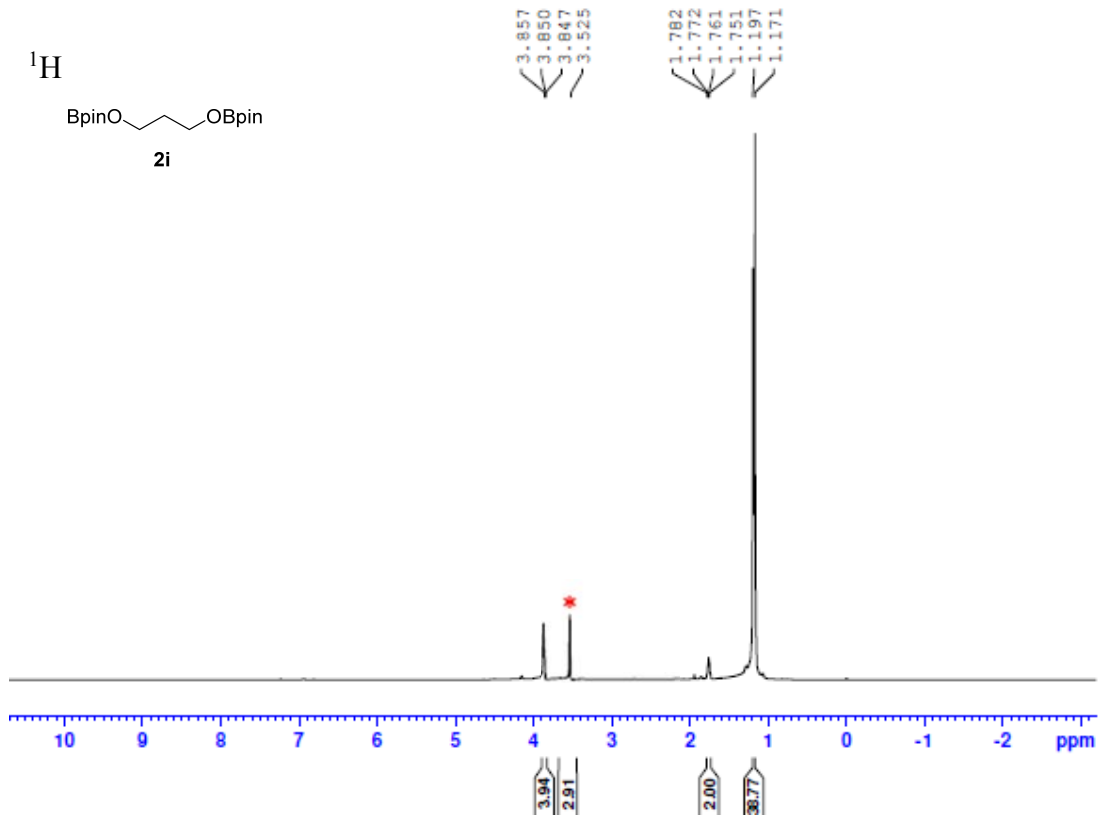

<sup>13</sup>C

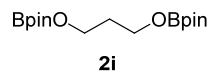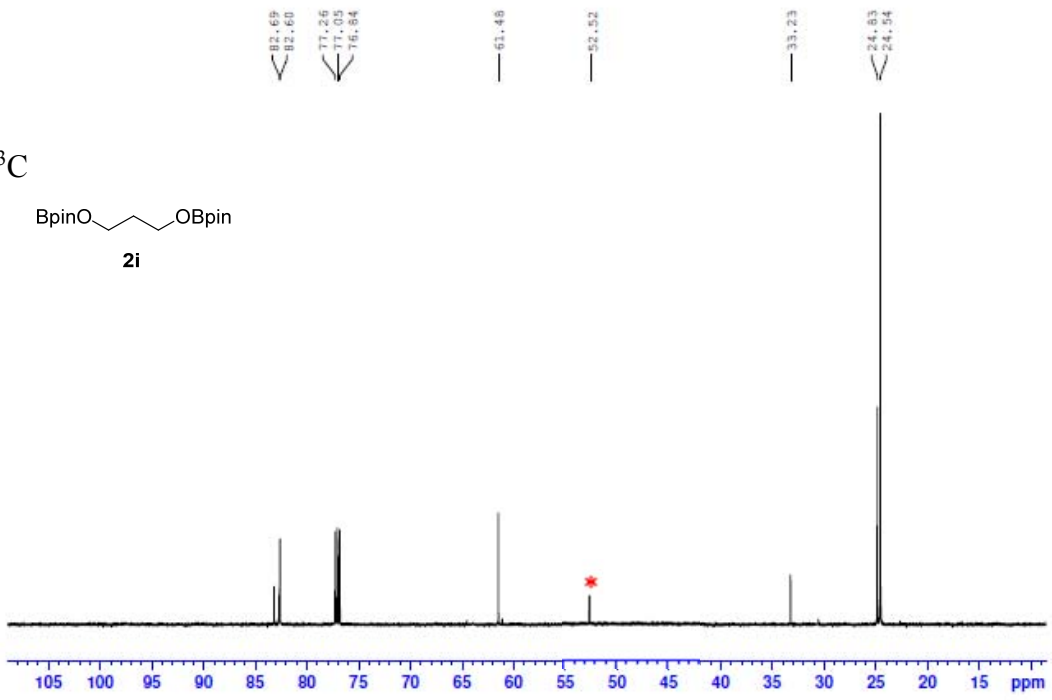

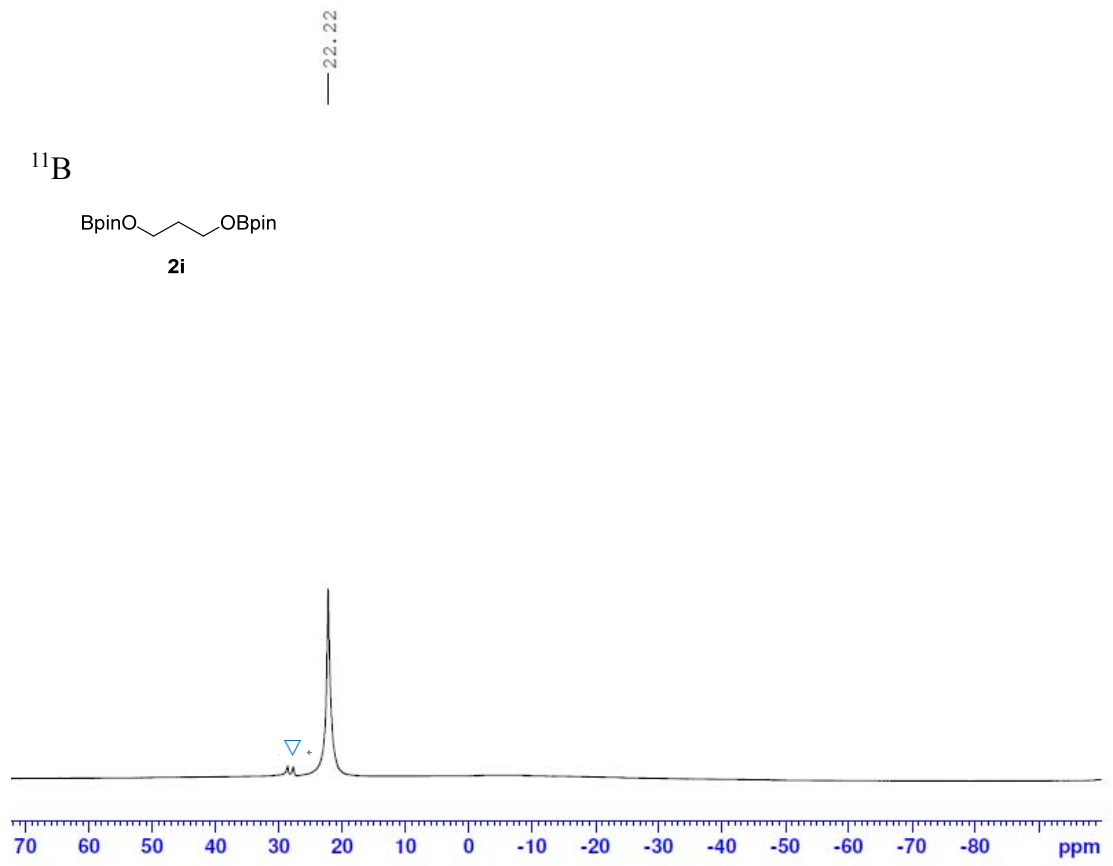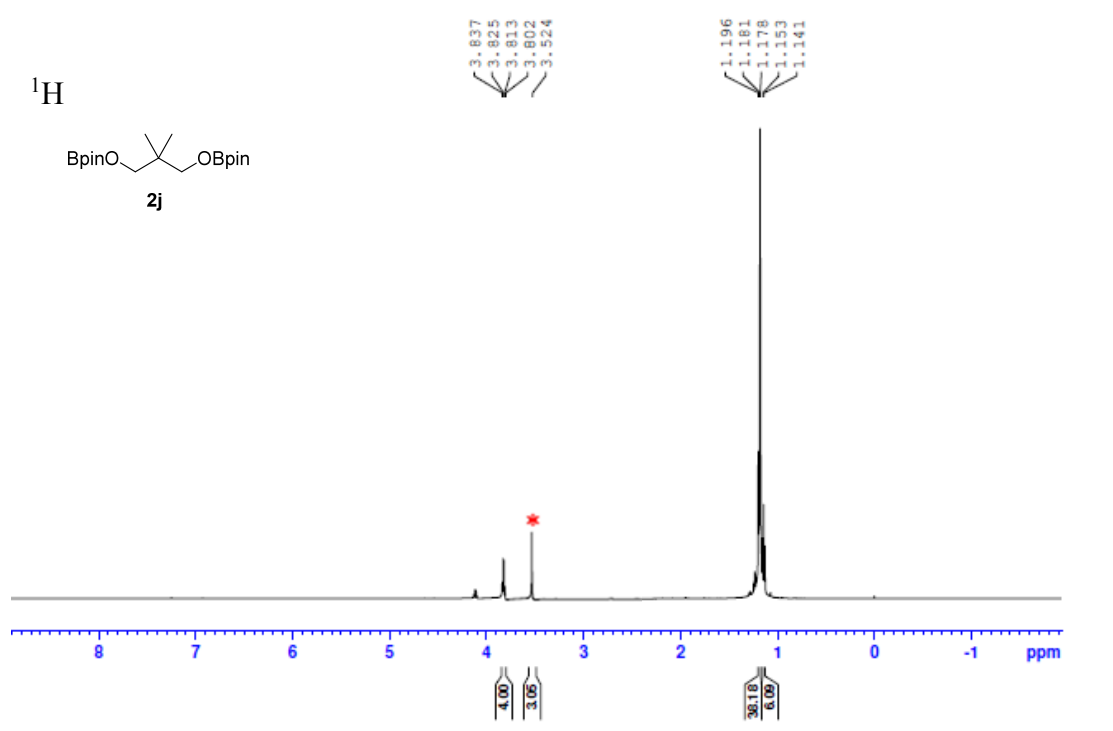



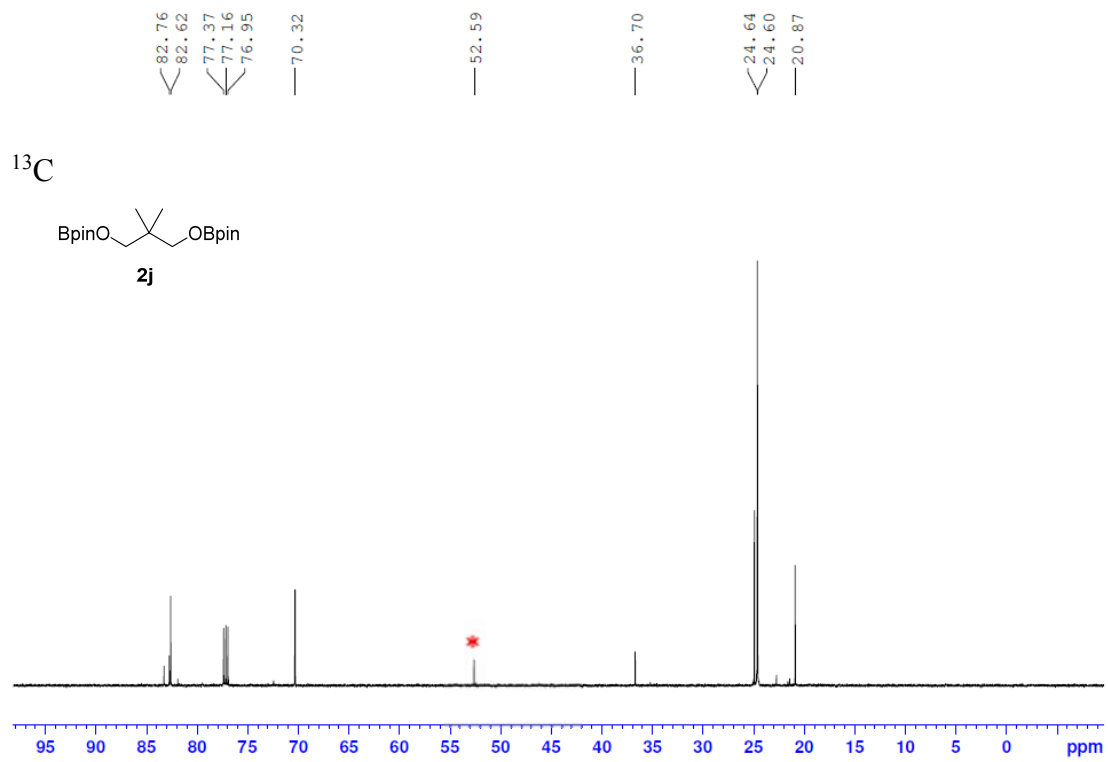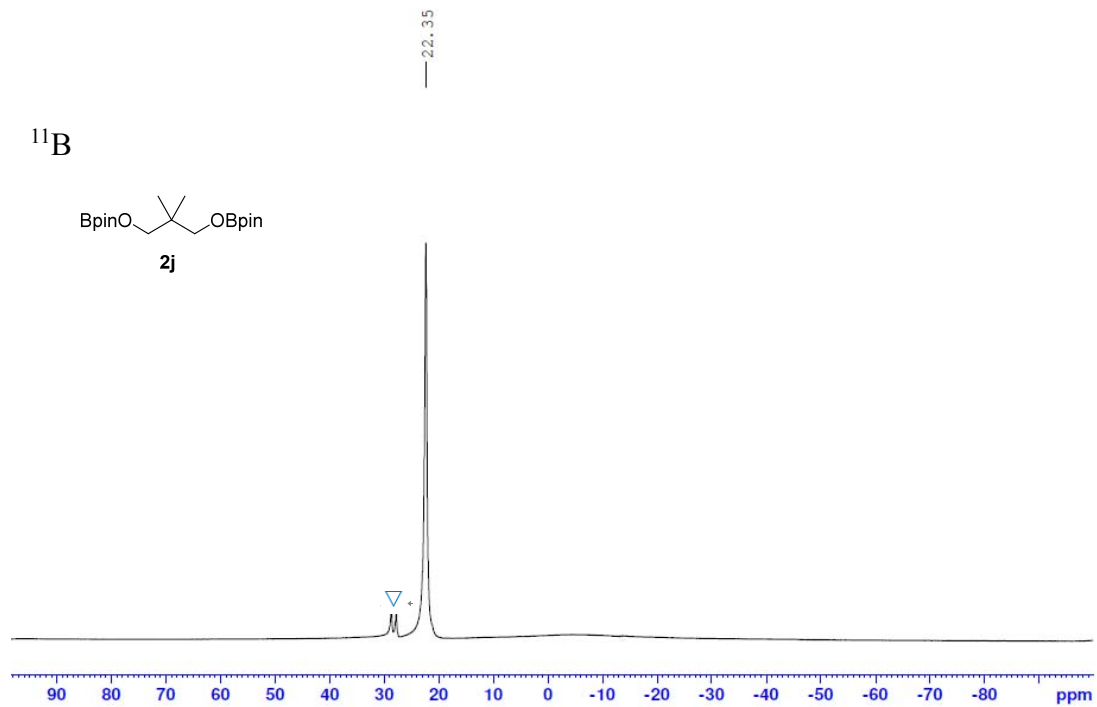

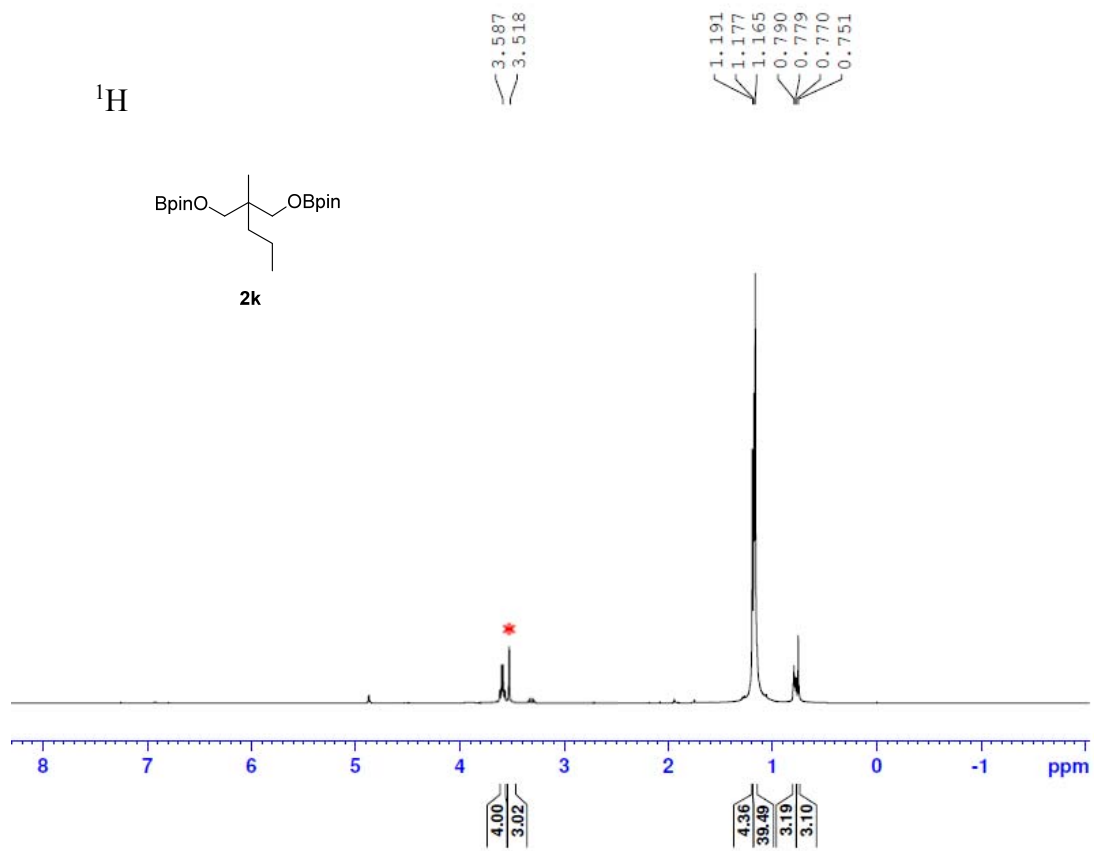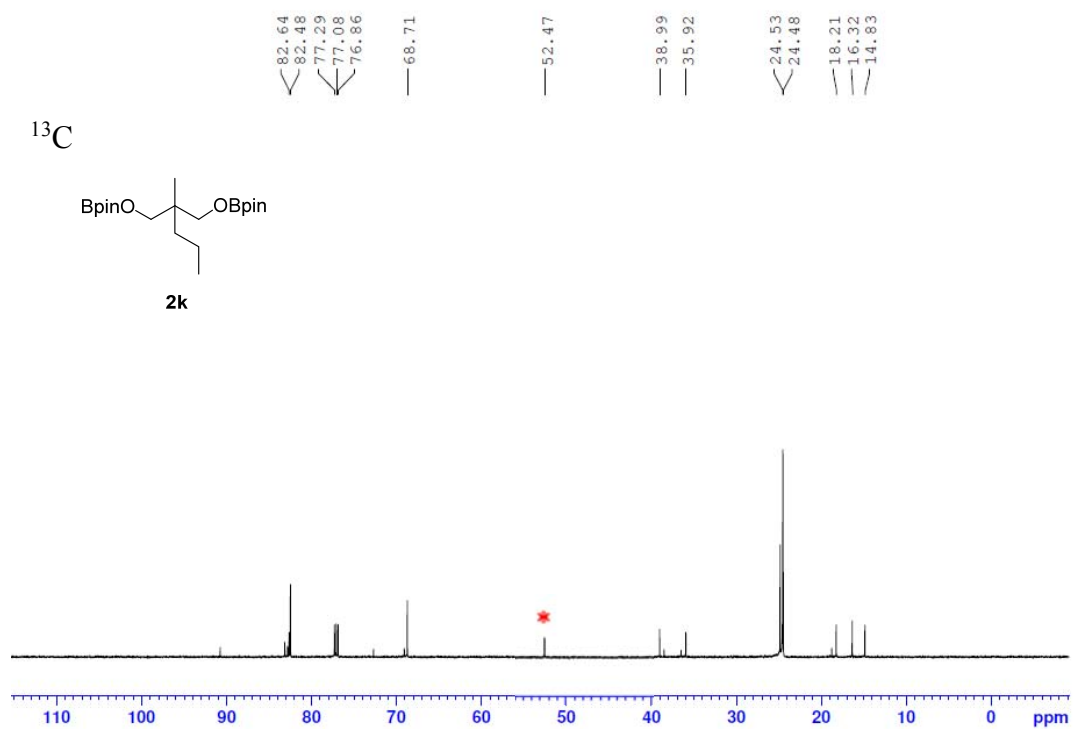



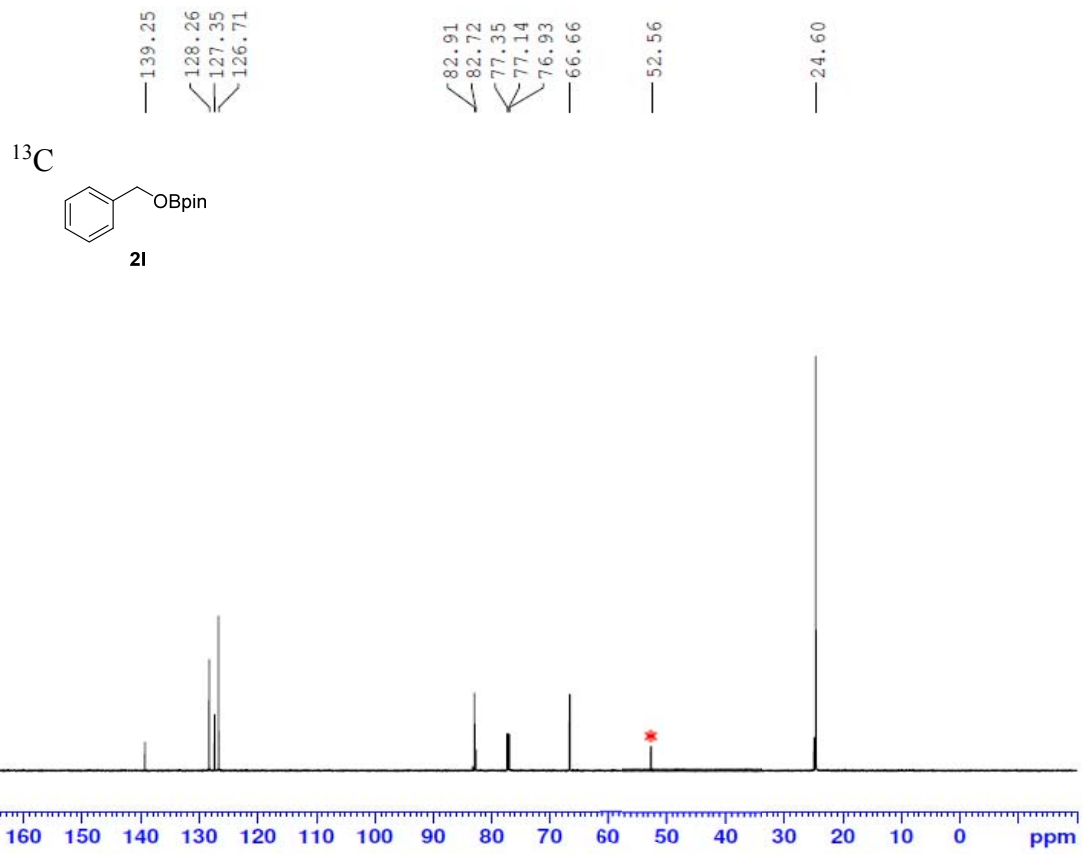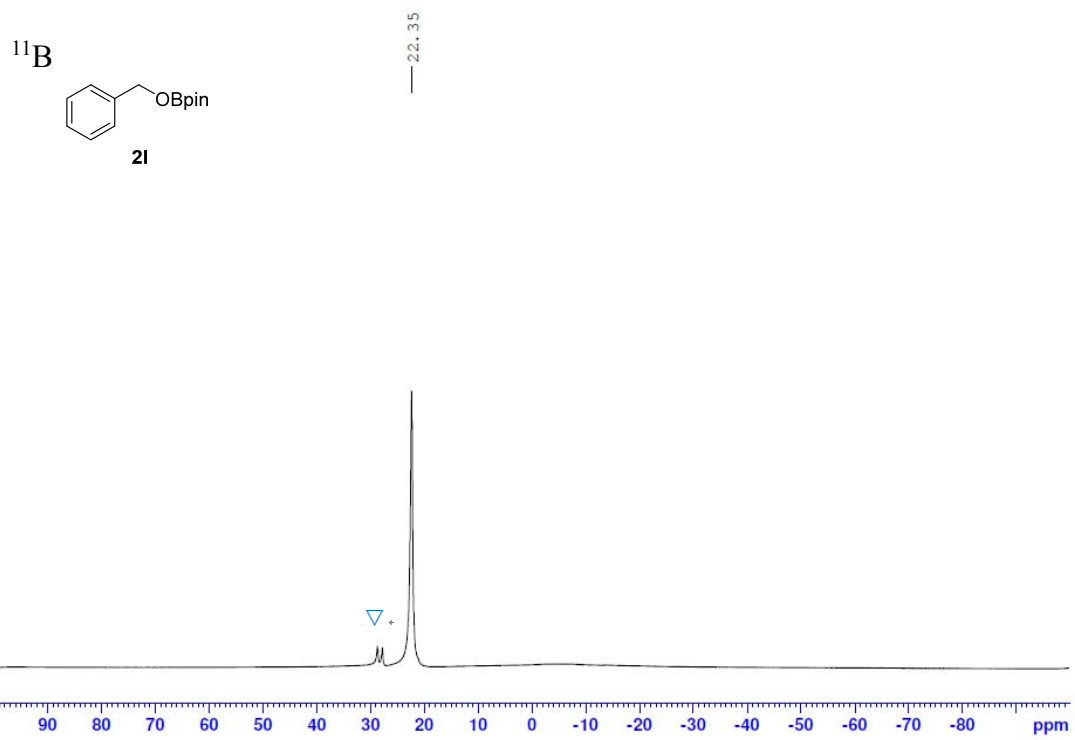

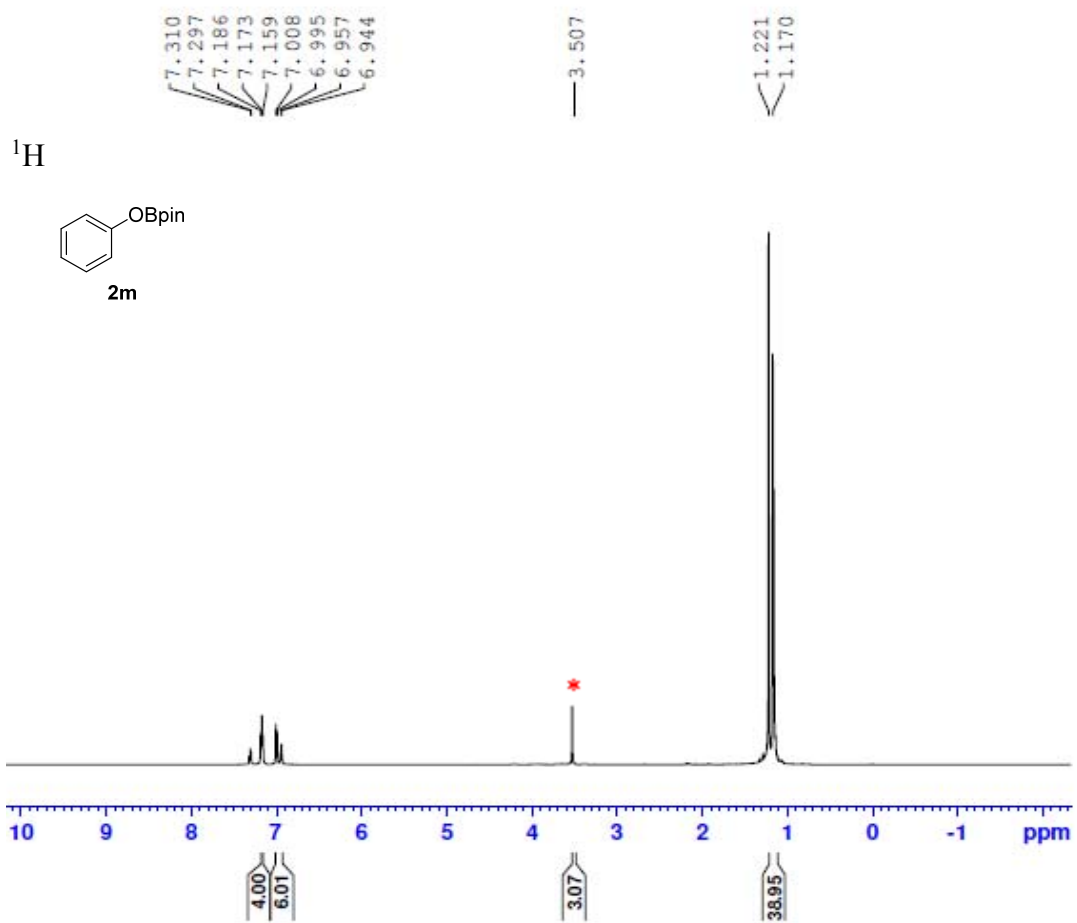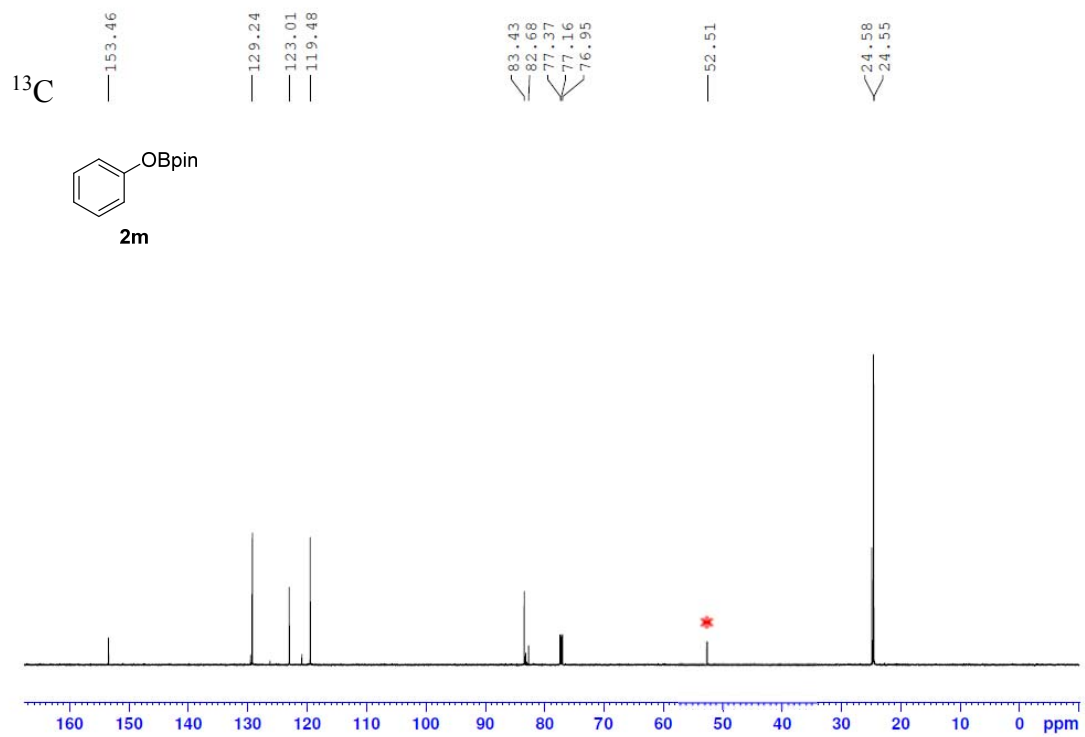

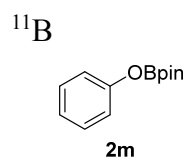

—22.23

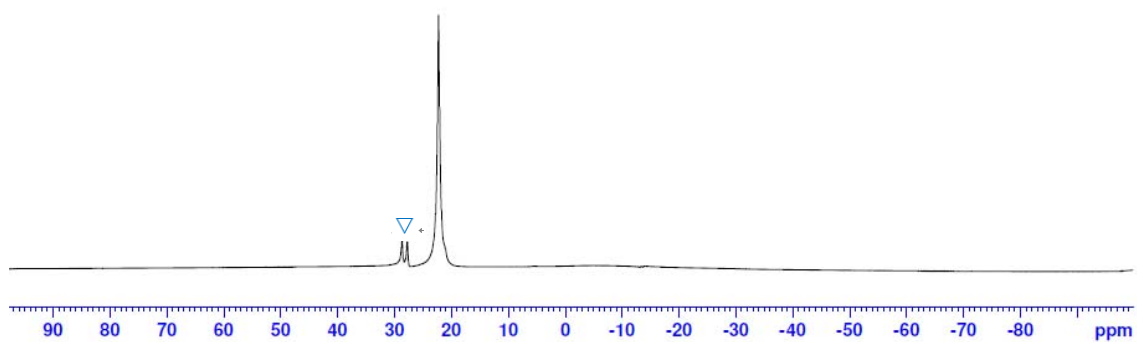

$^1\text{H}$

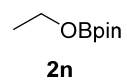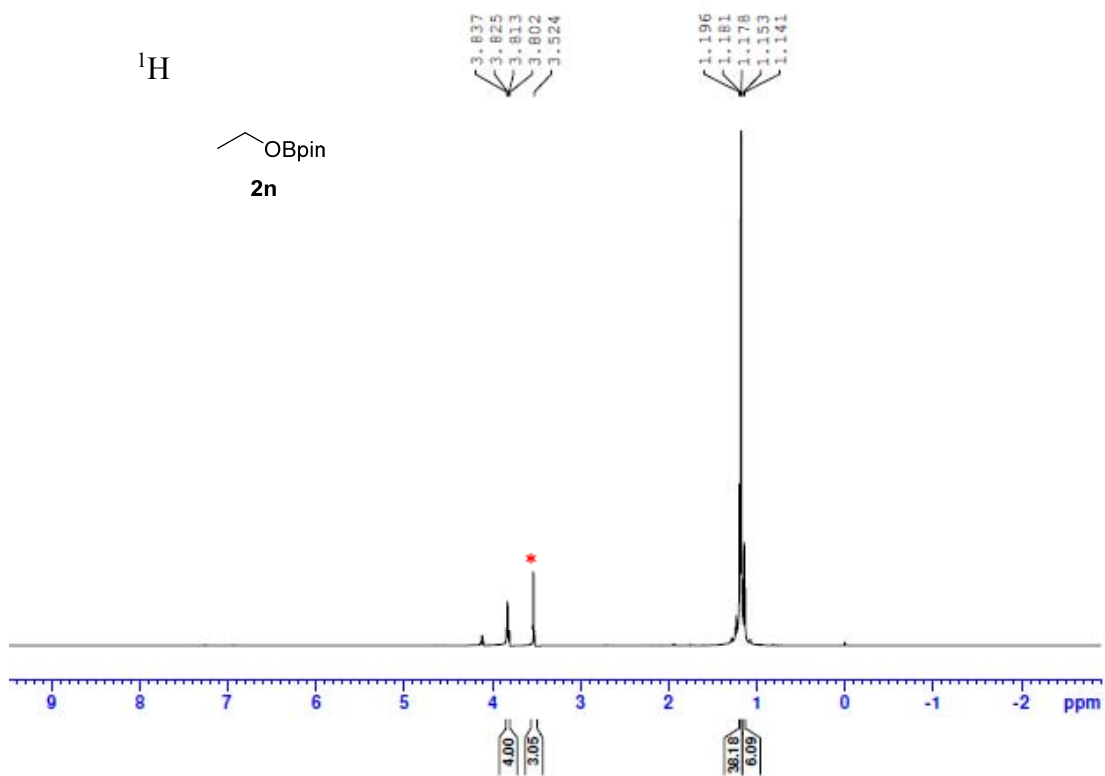

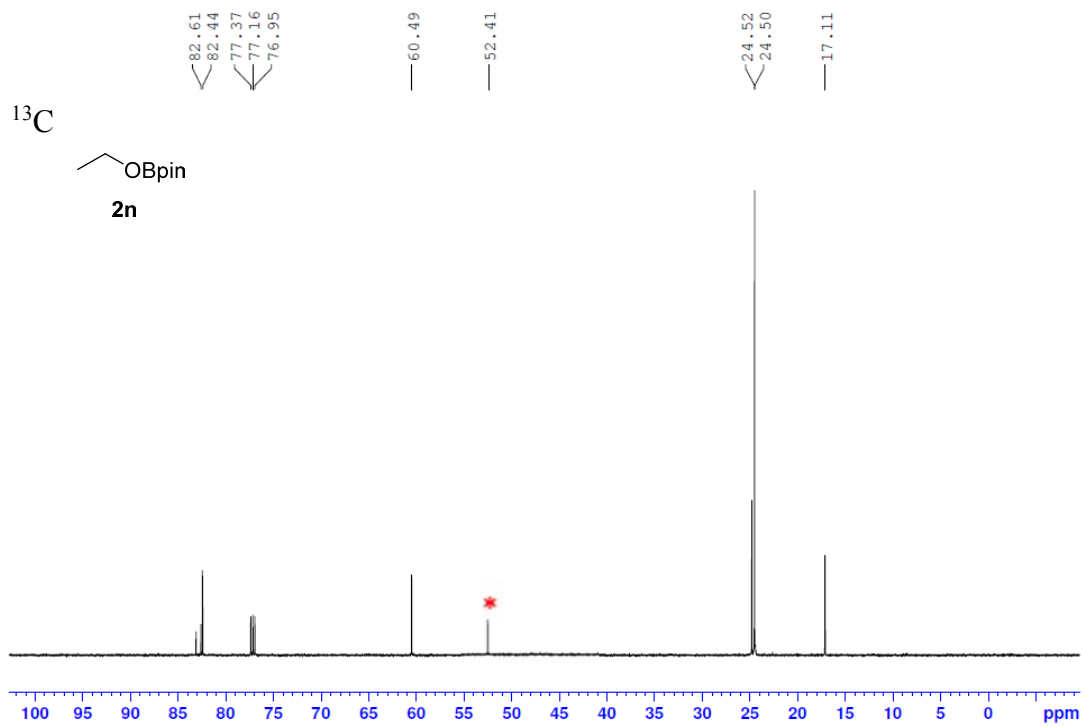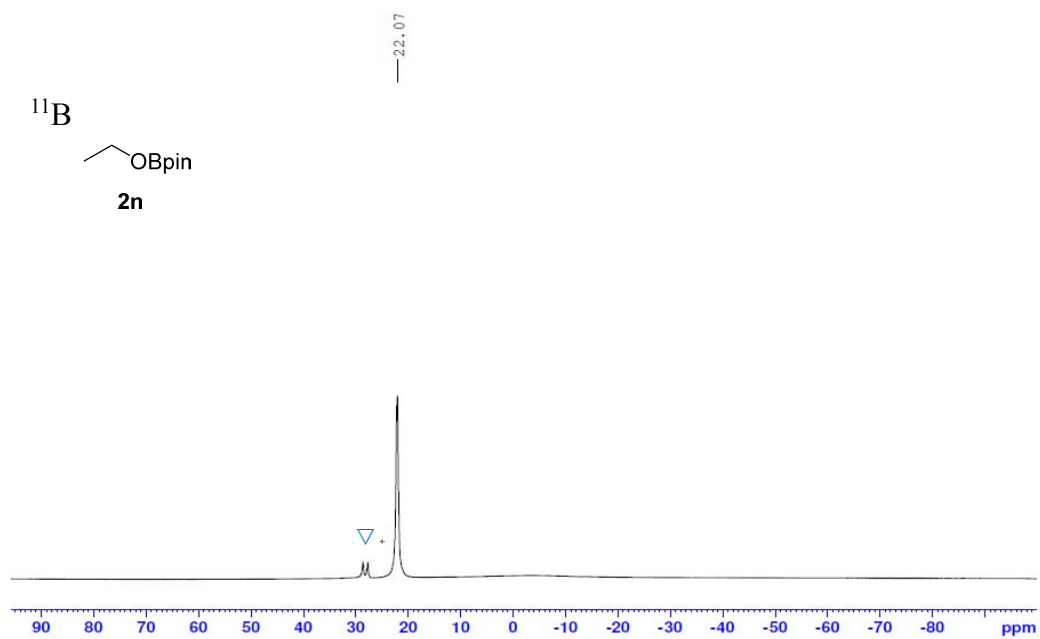

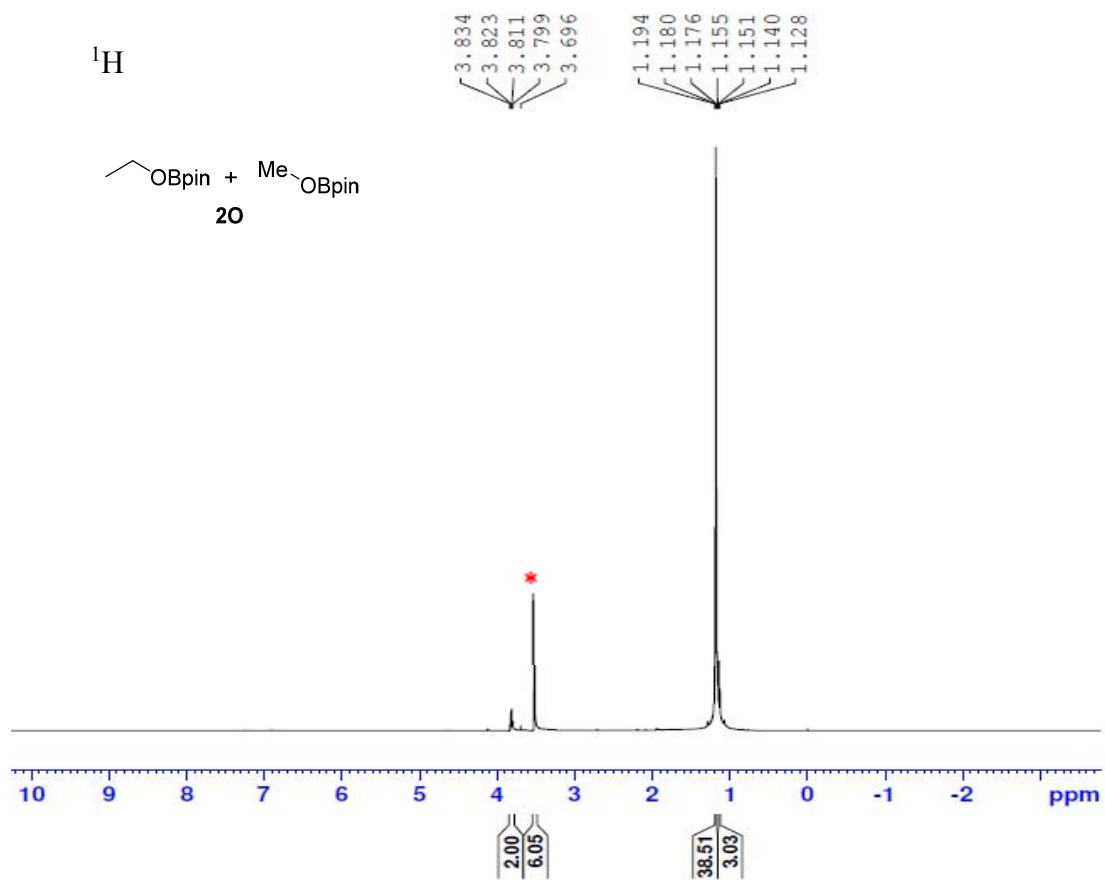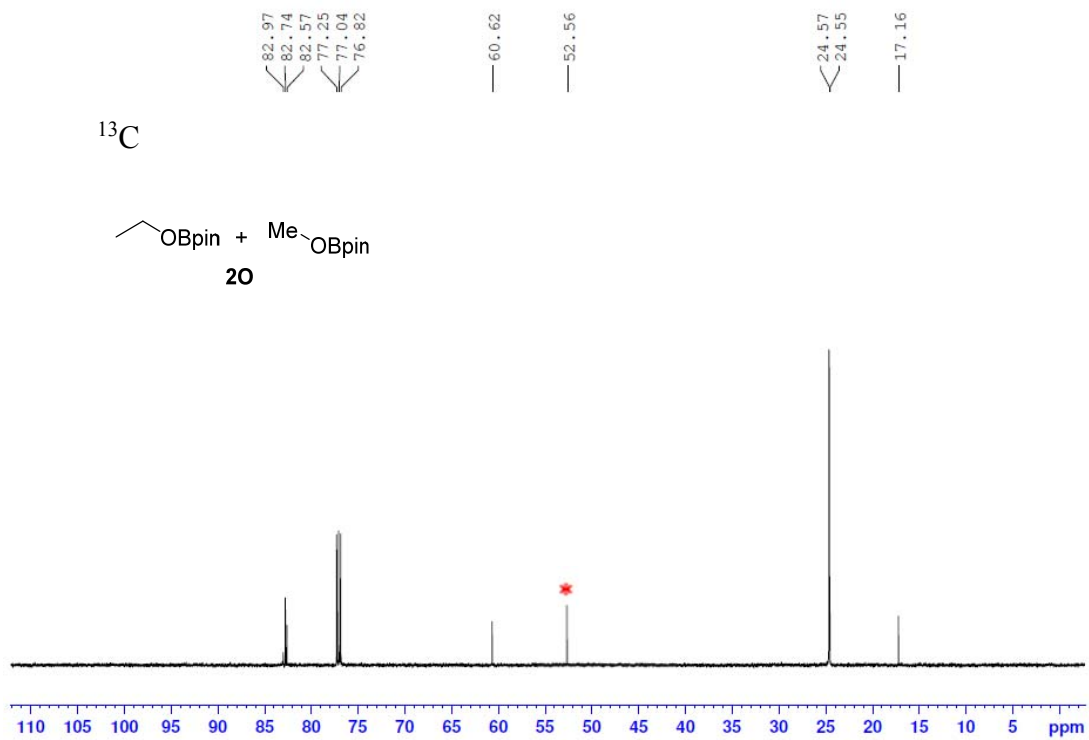



$^{11}\text{B}$

— 22.25

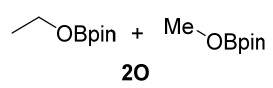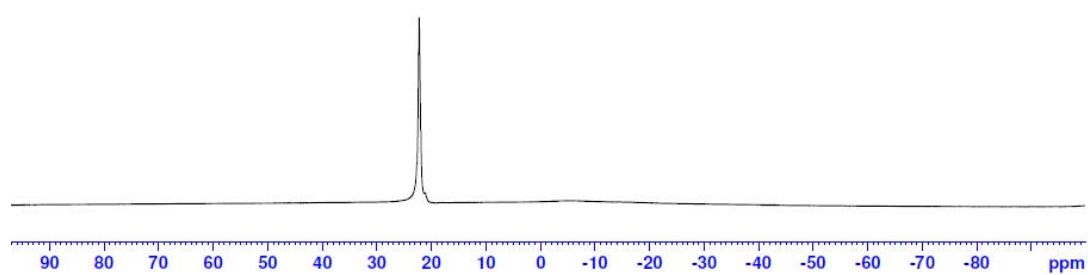

$^1\text{H}$

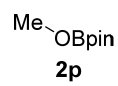

— 3.466

— 1.125

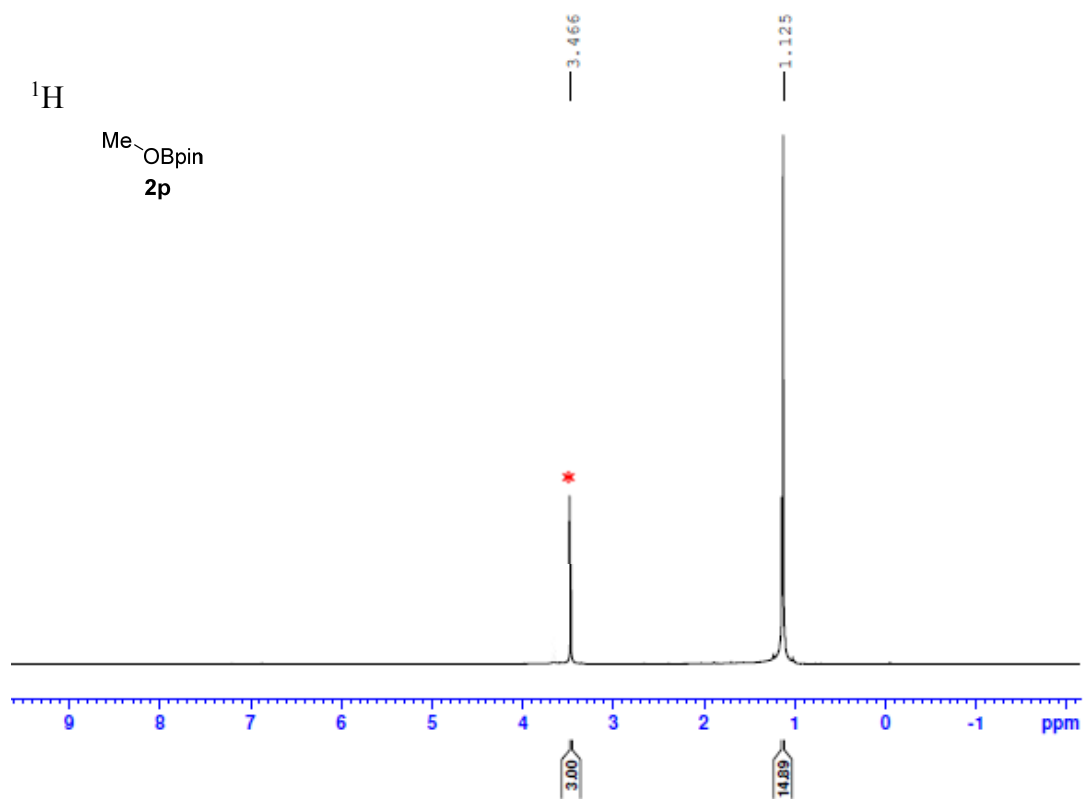

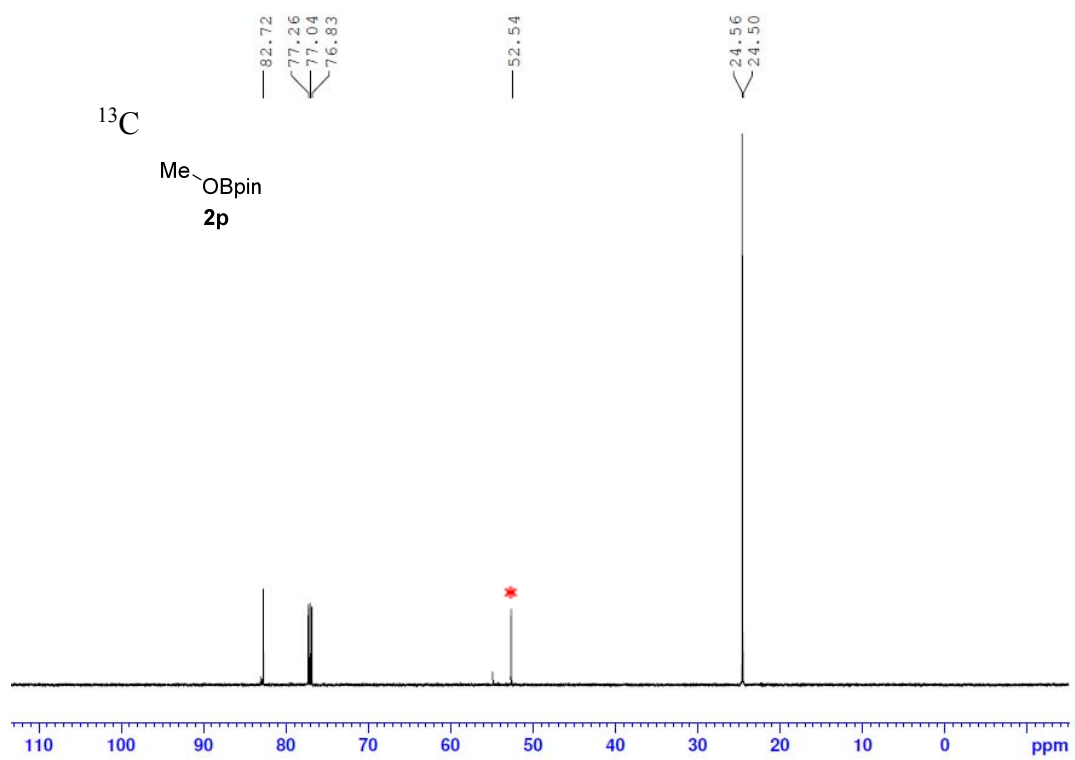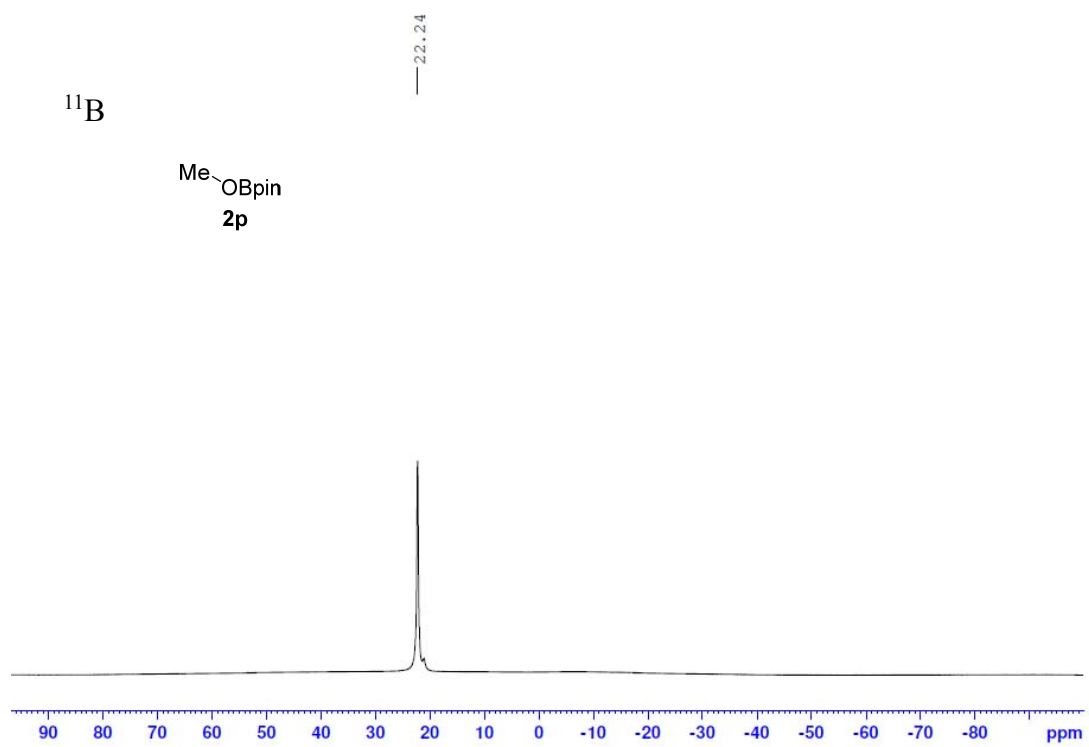

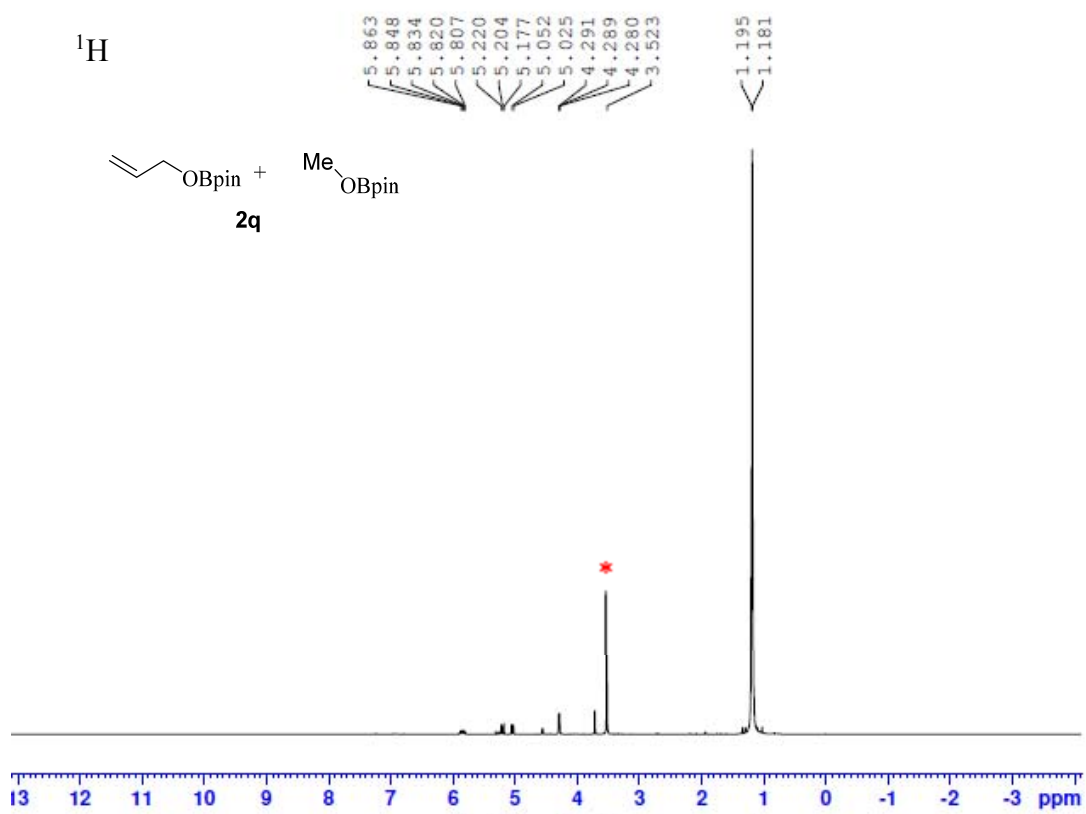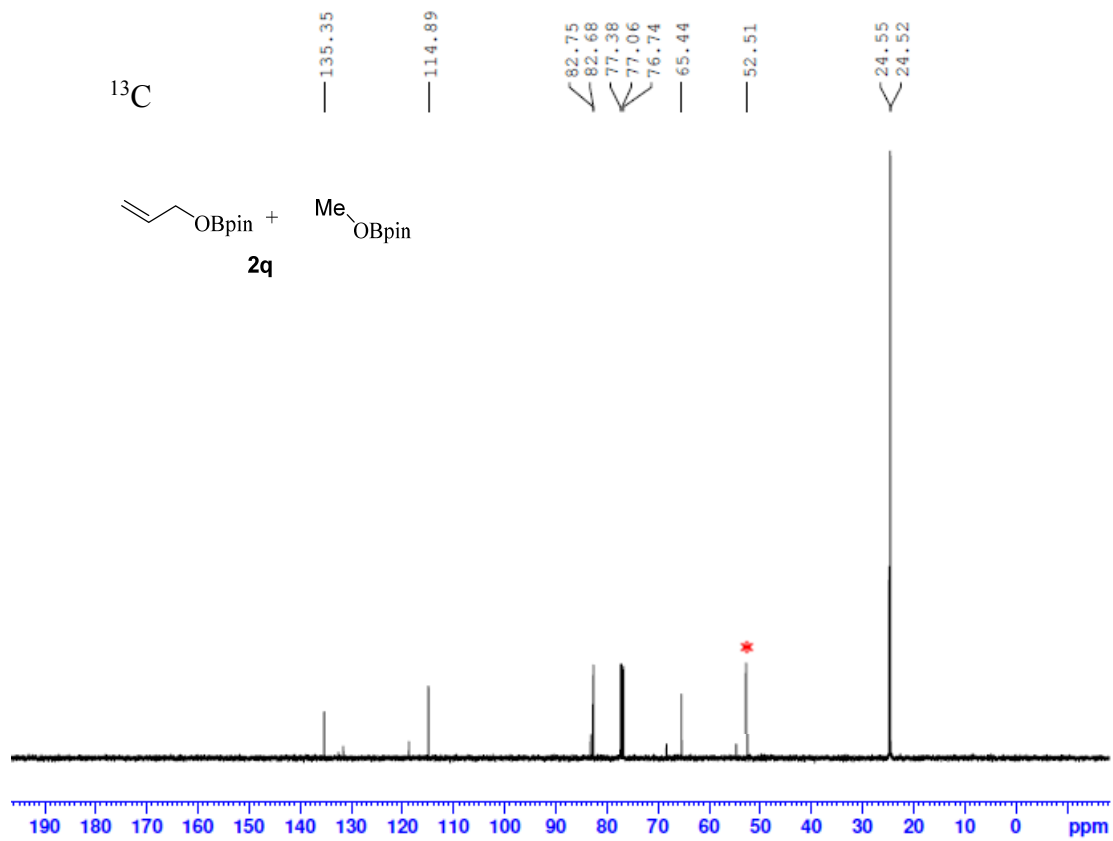

$^{11}\text{B}$

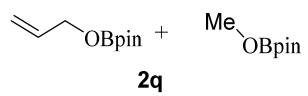

28.85  
27.48  
22.23

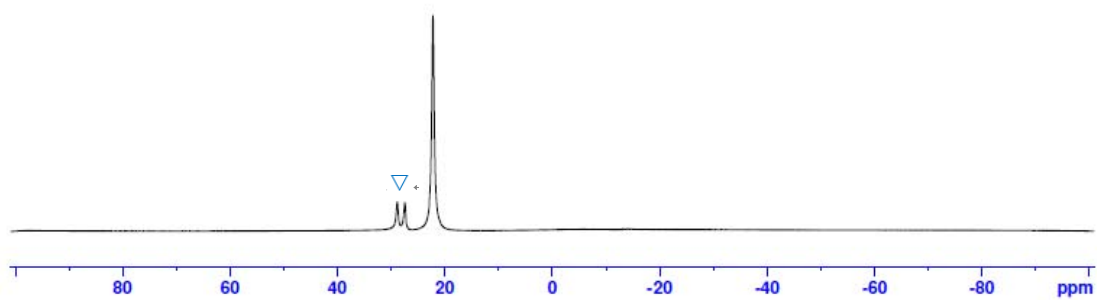

$^1\text{H}$

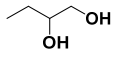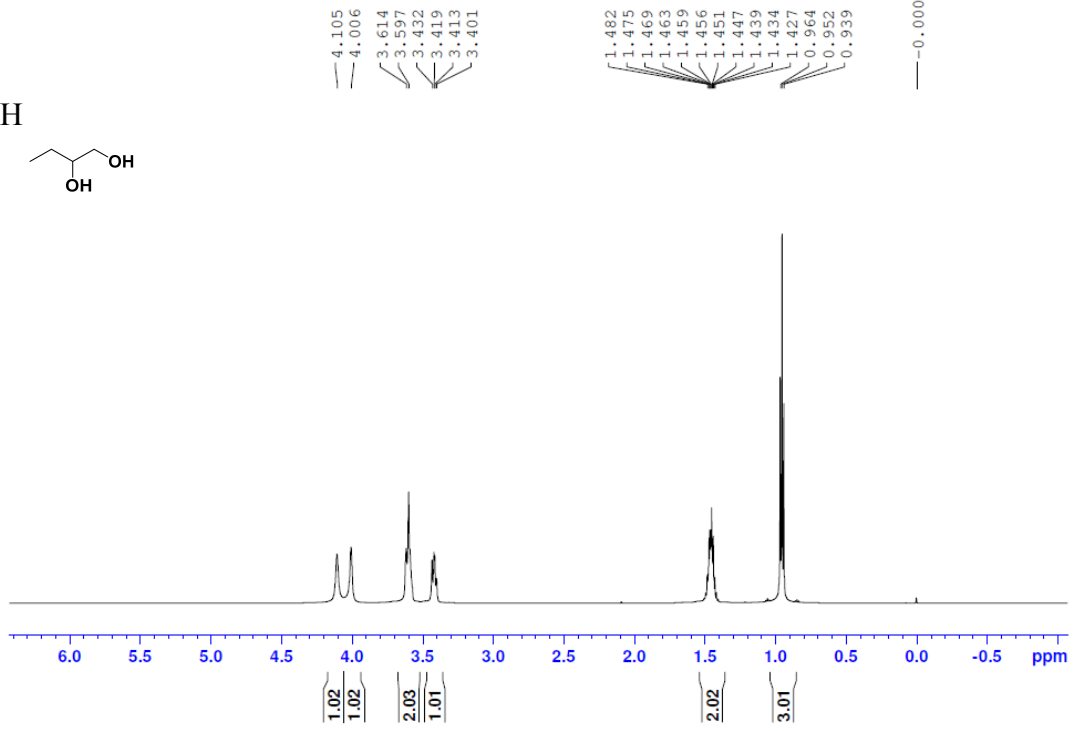

$^{13}\text{C}$

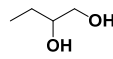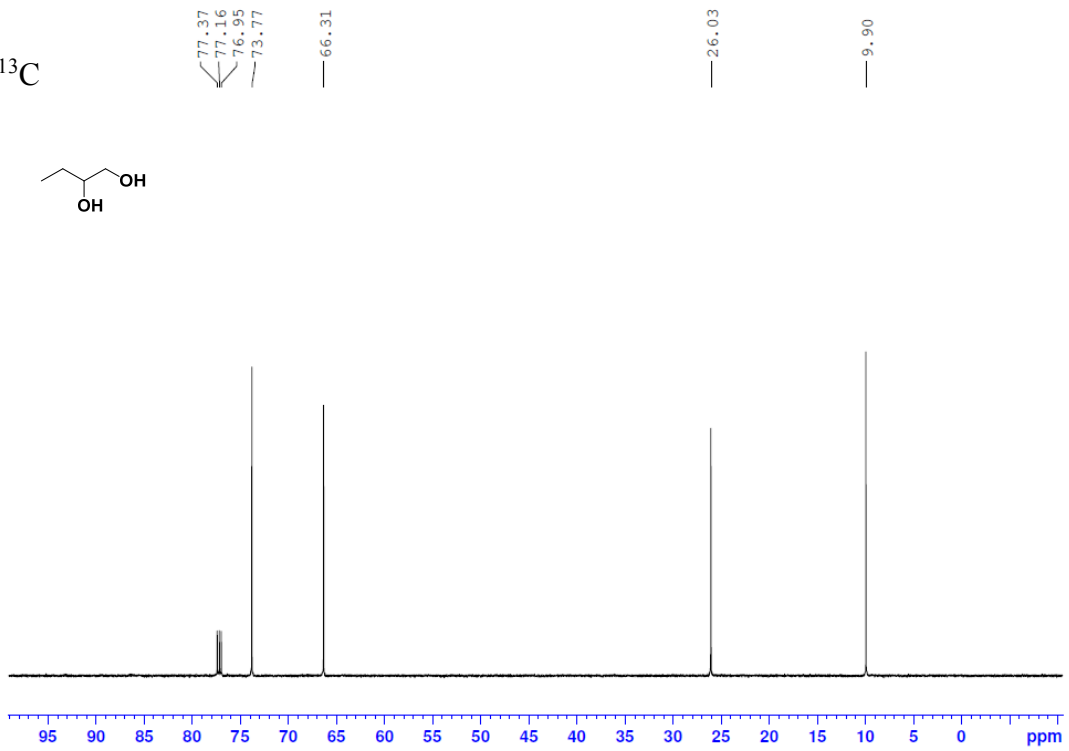

<sup>1</sup>H

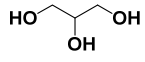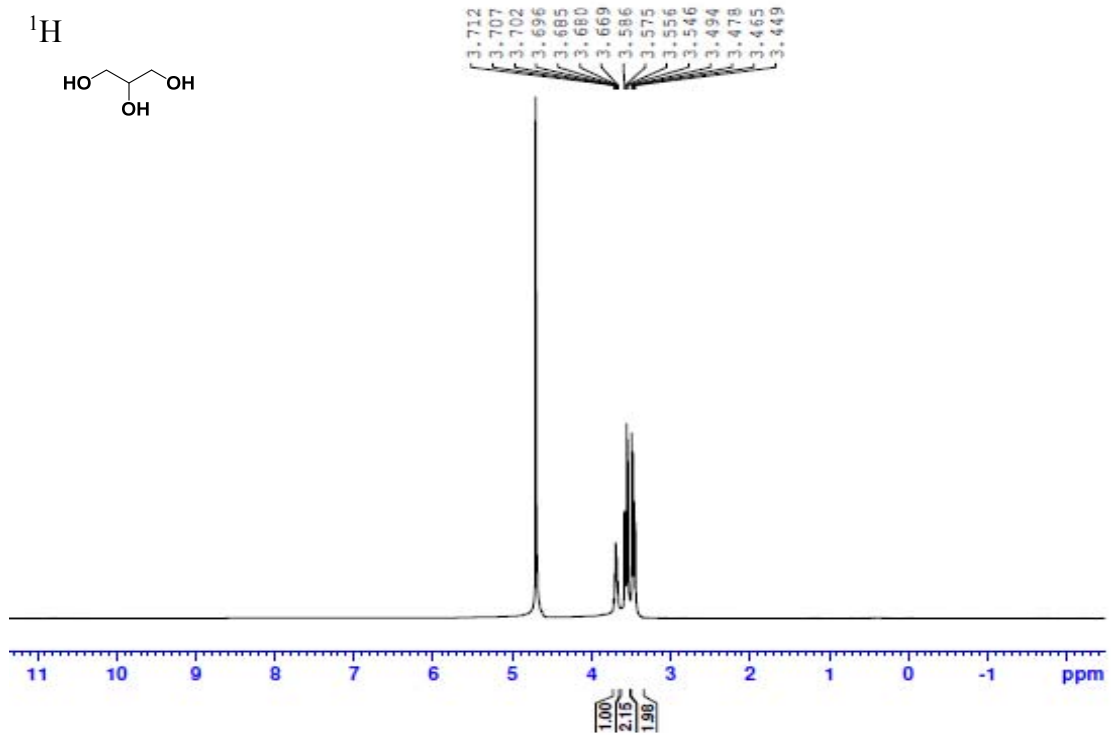

<sup>13</sup>C

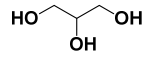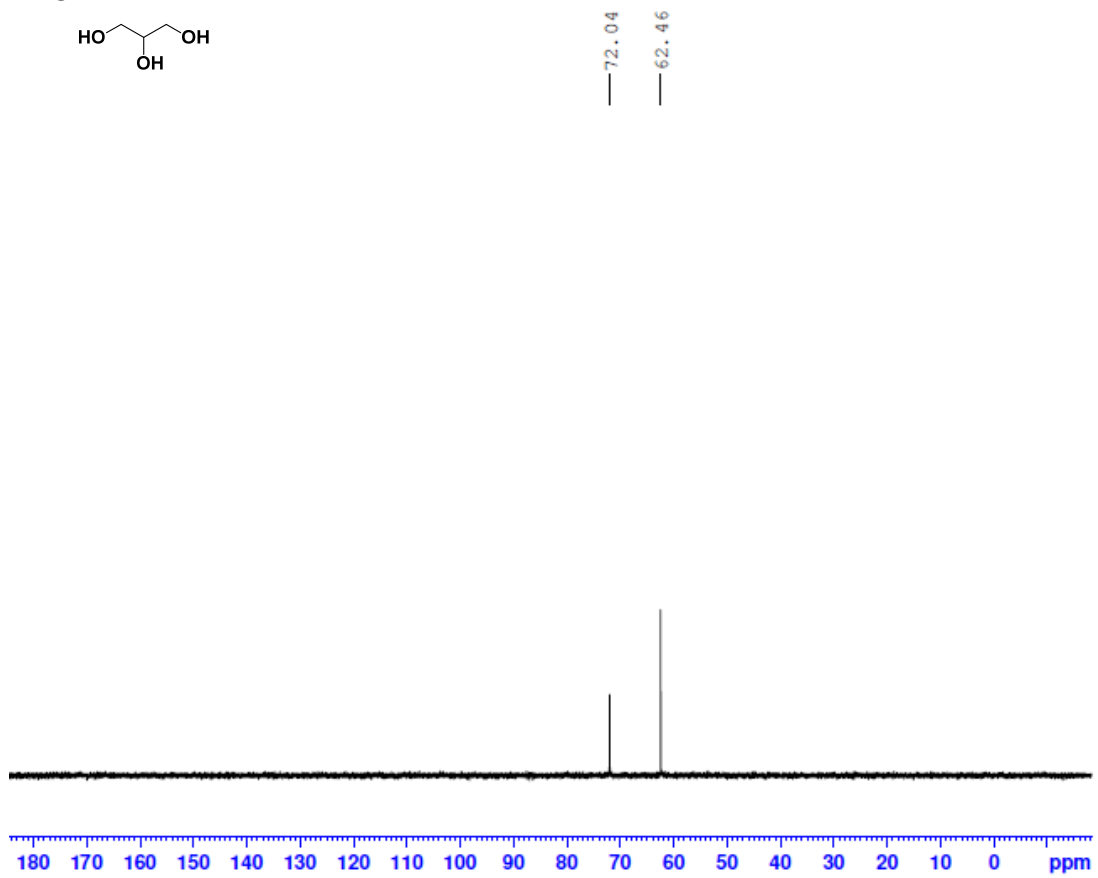

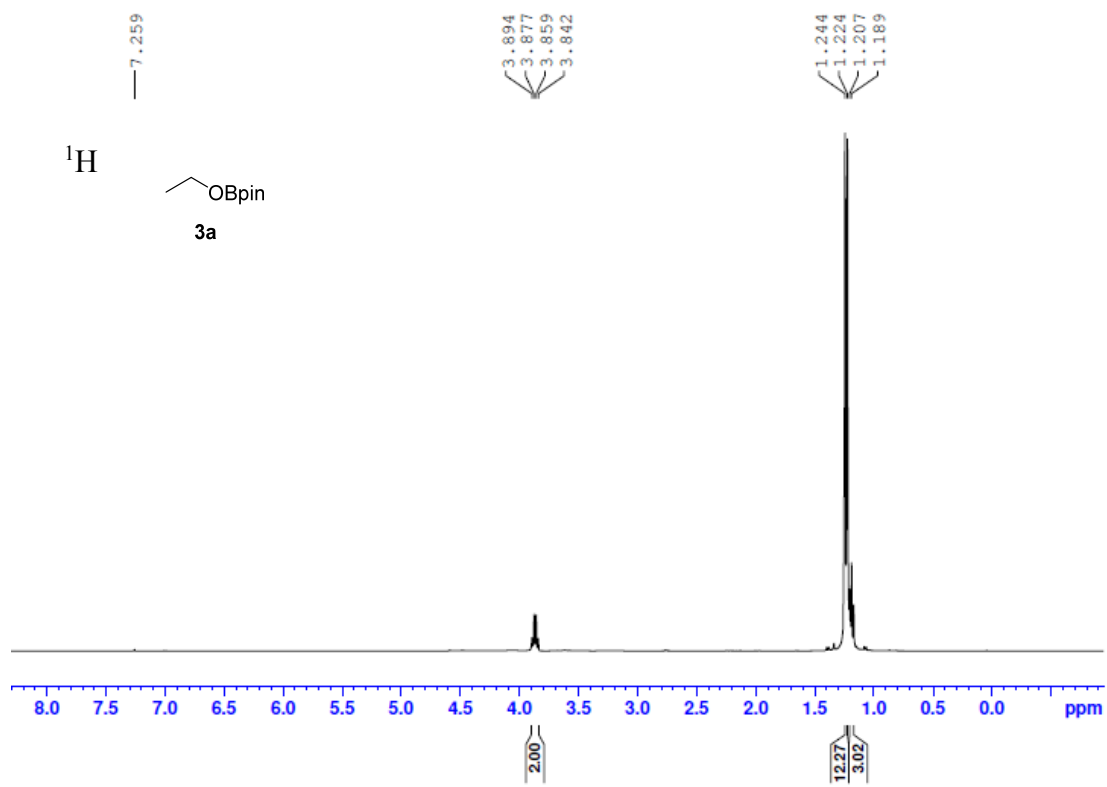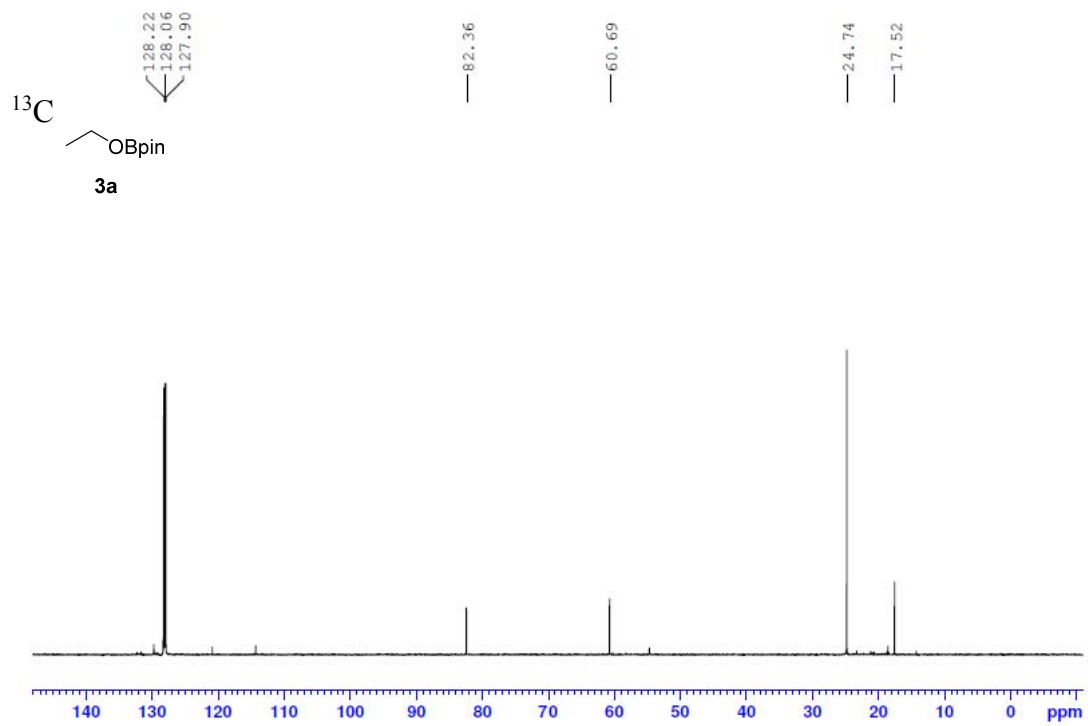

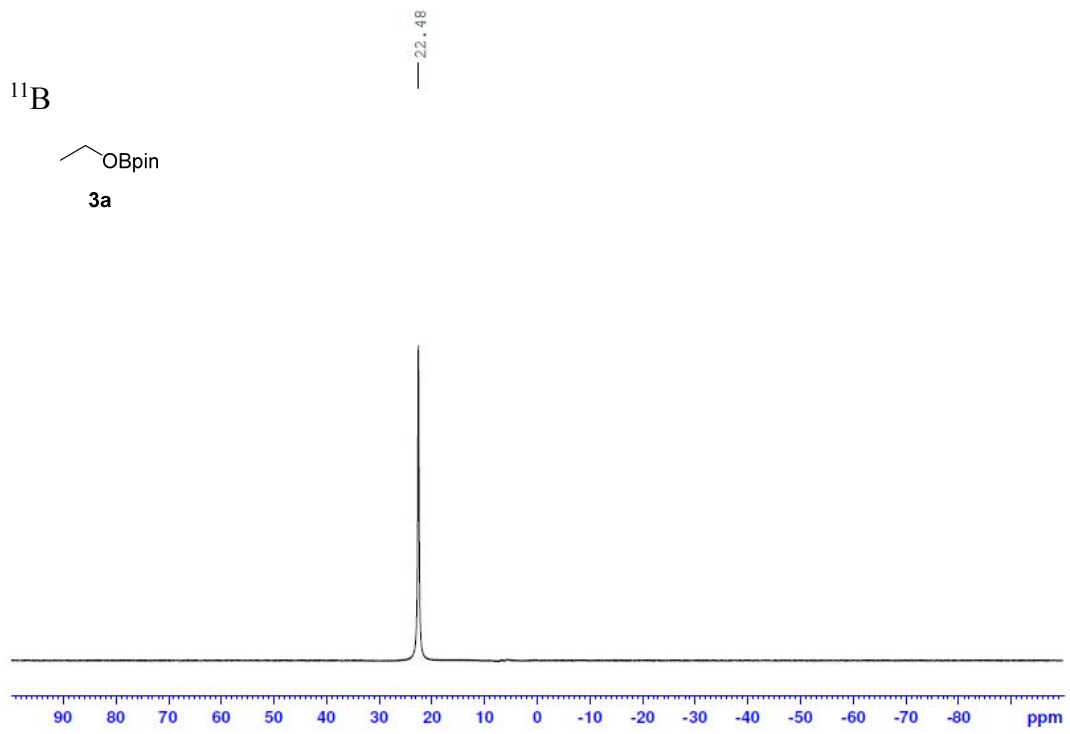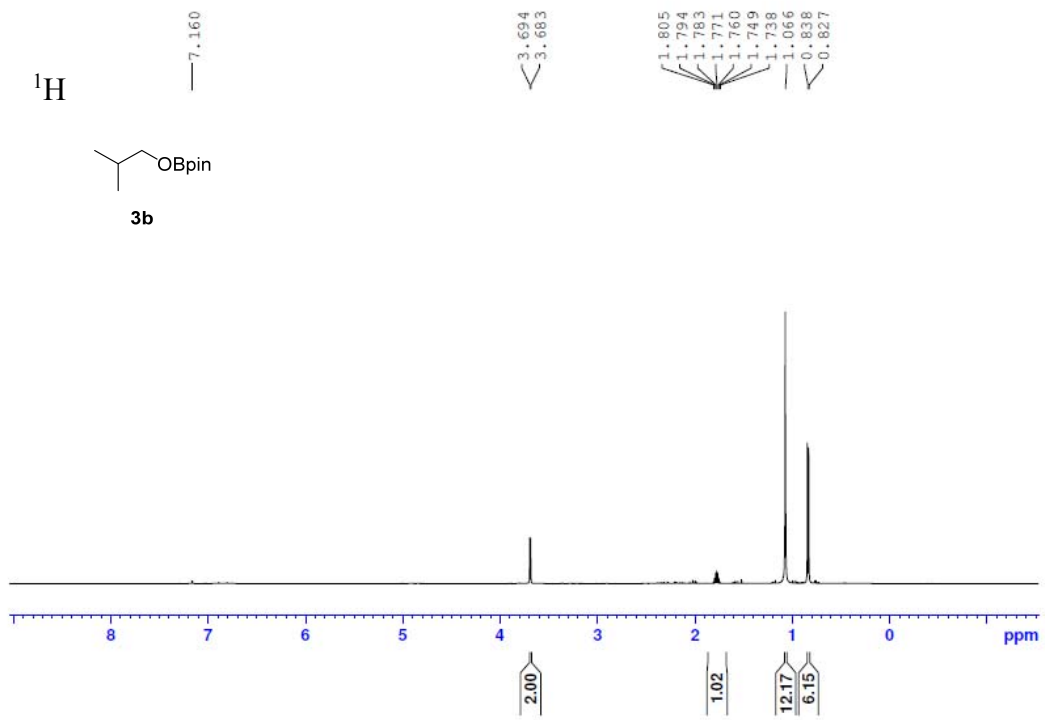



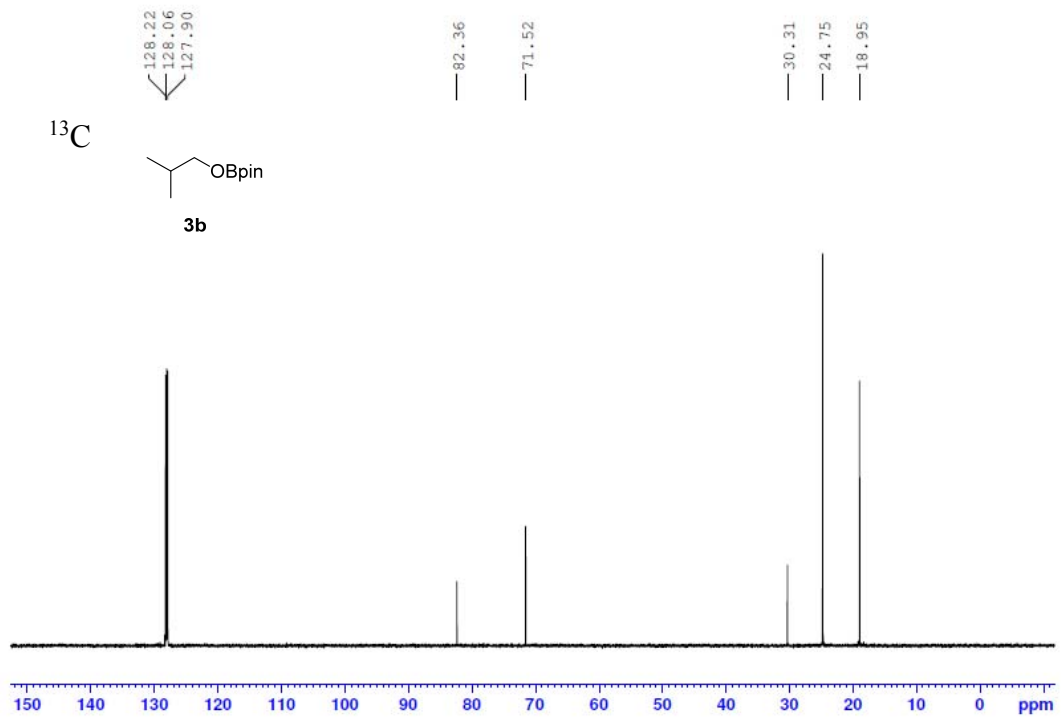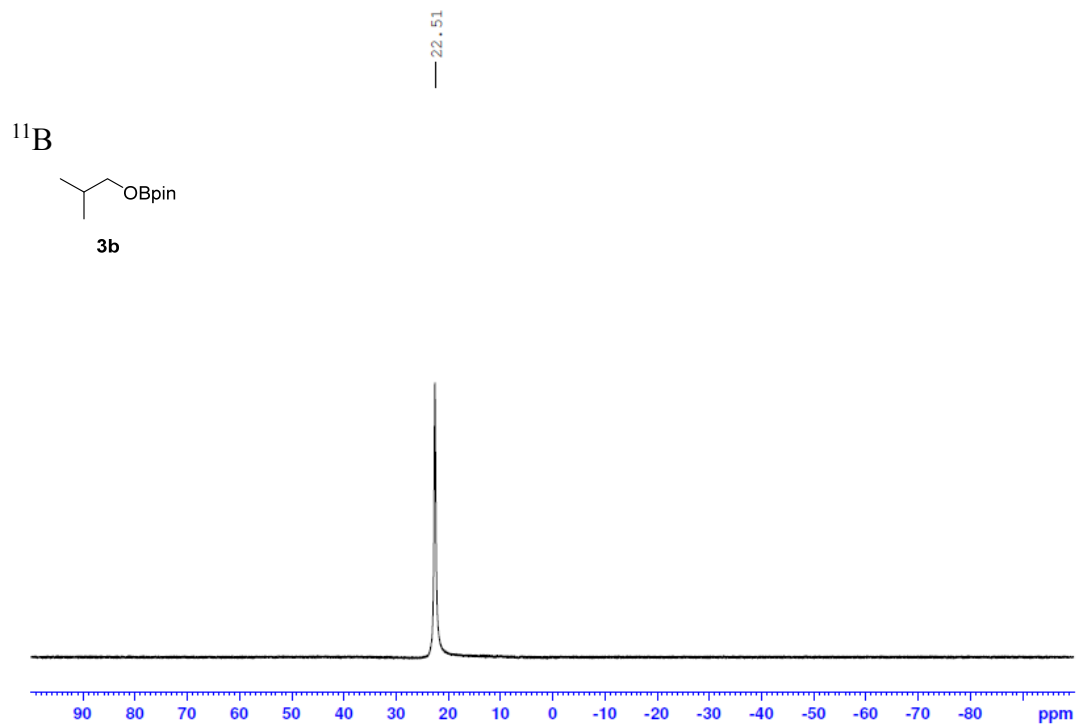



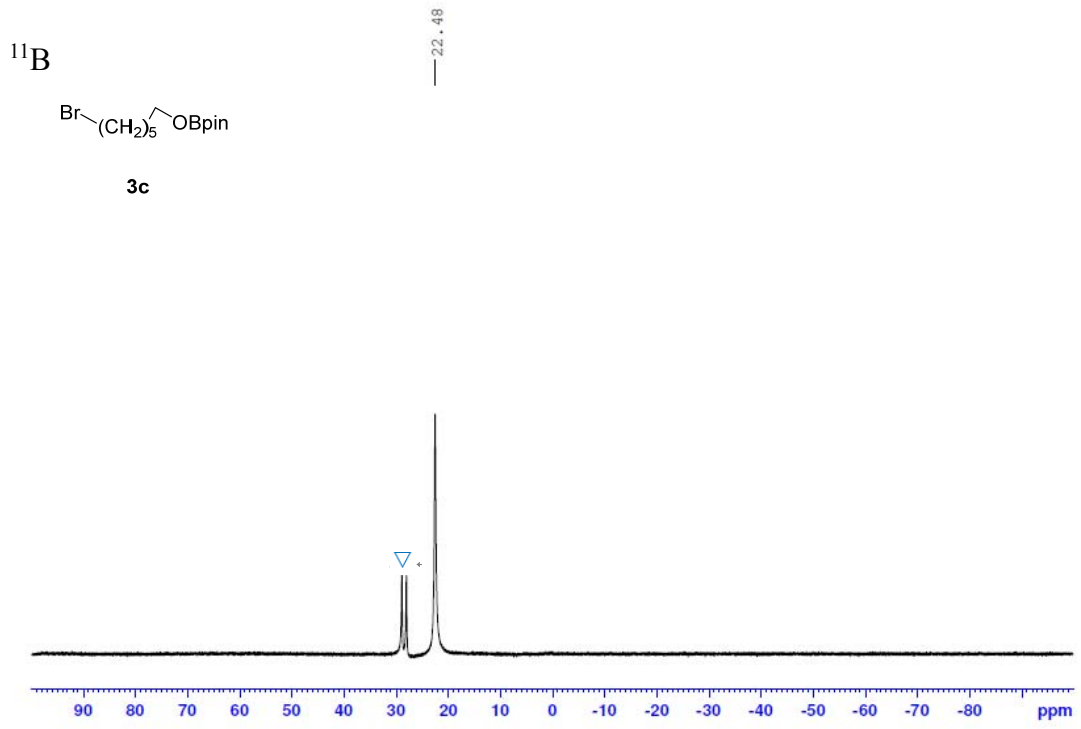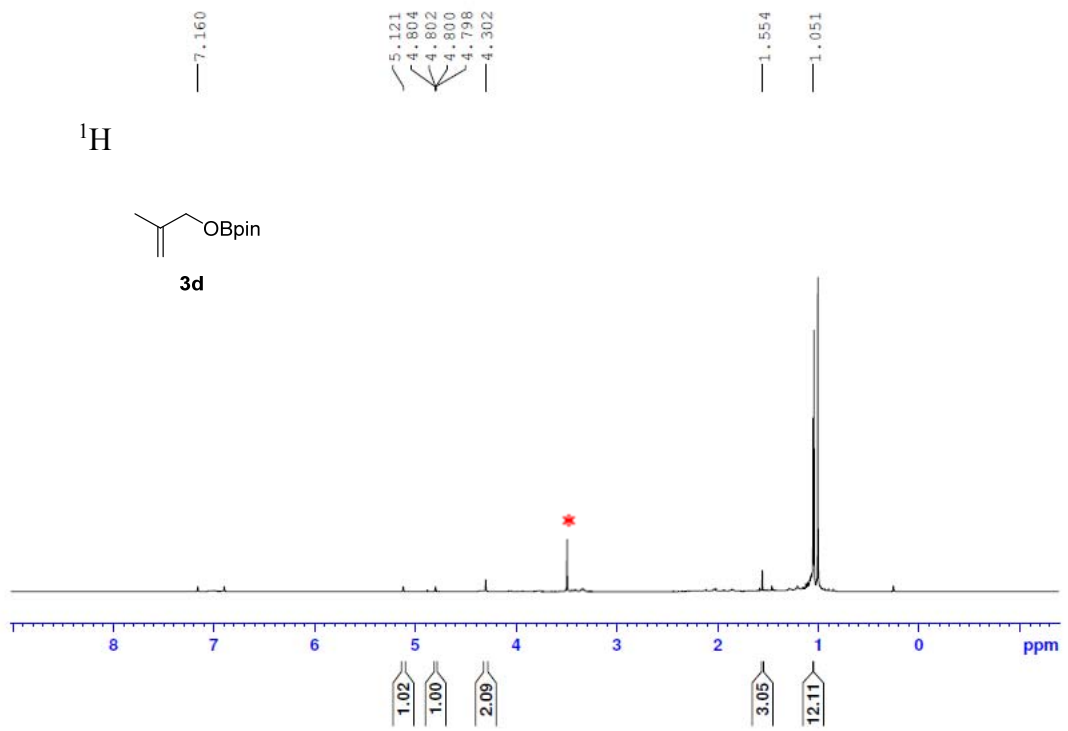

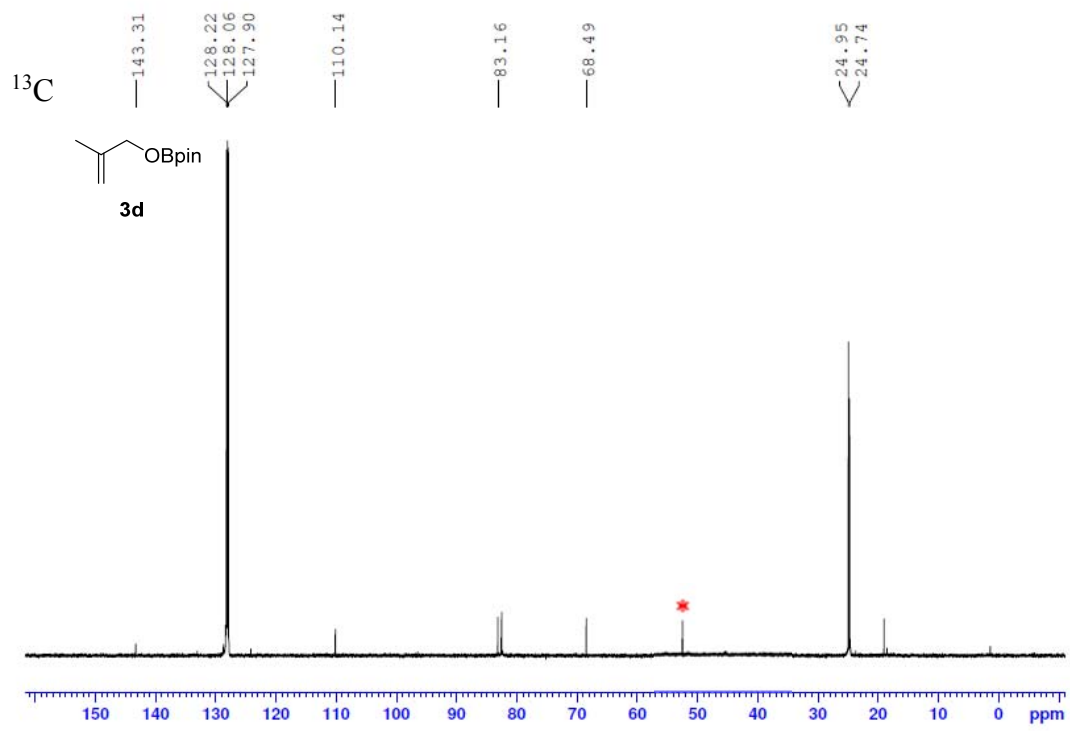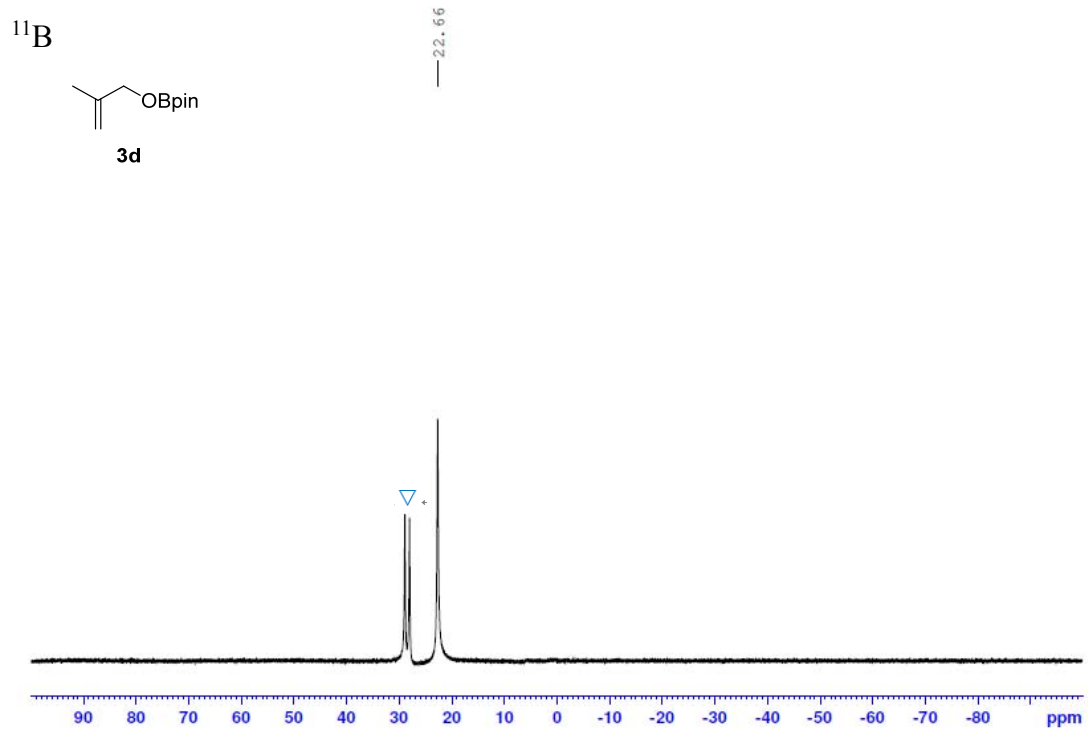

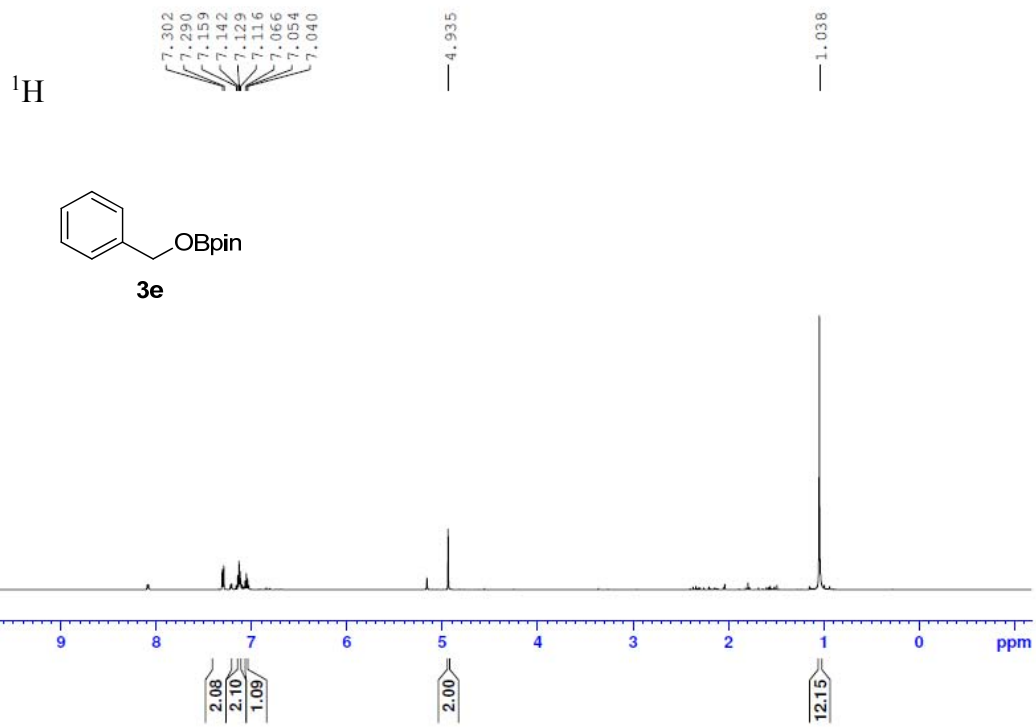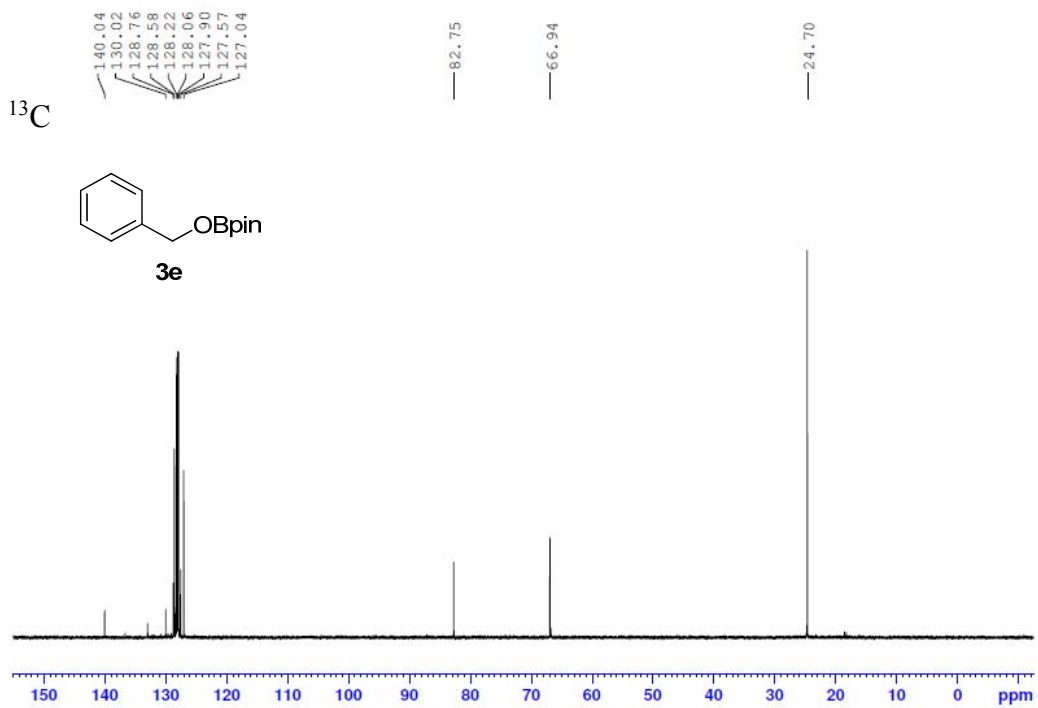

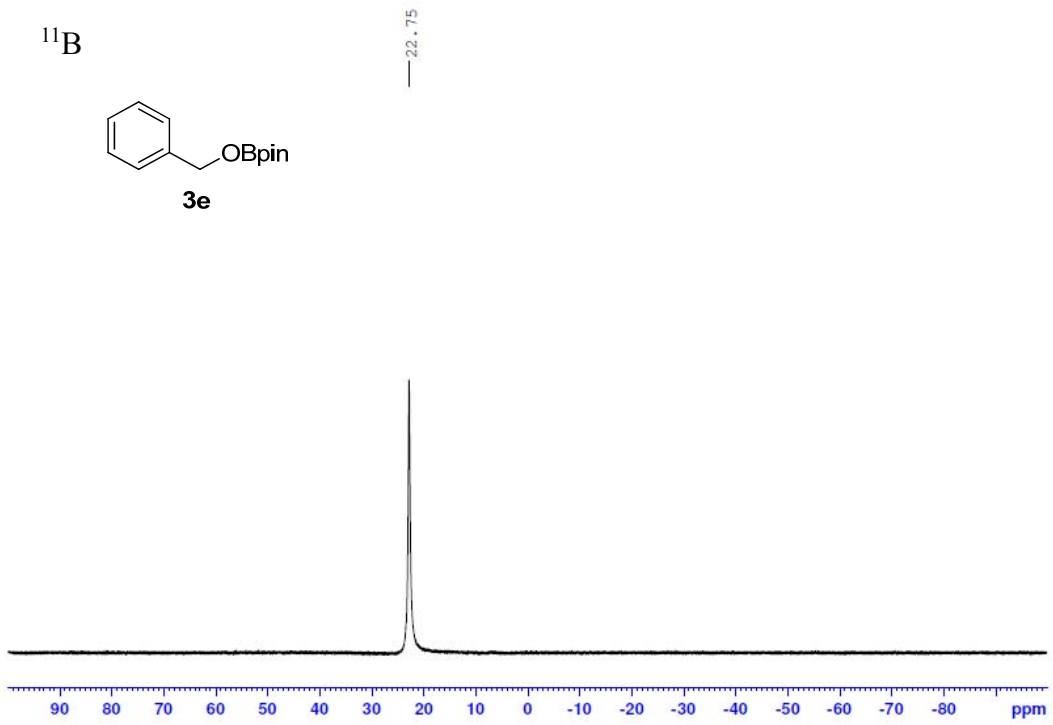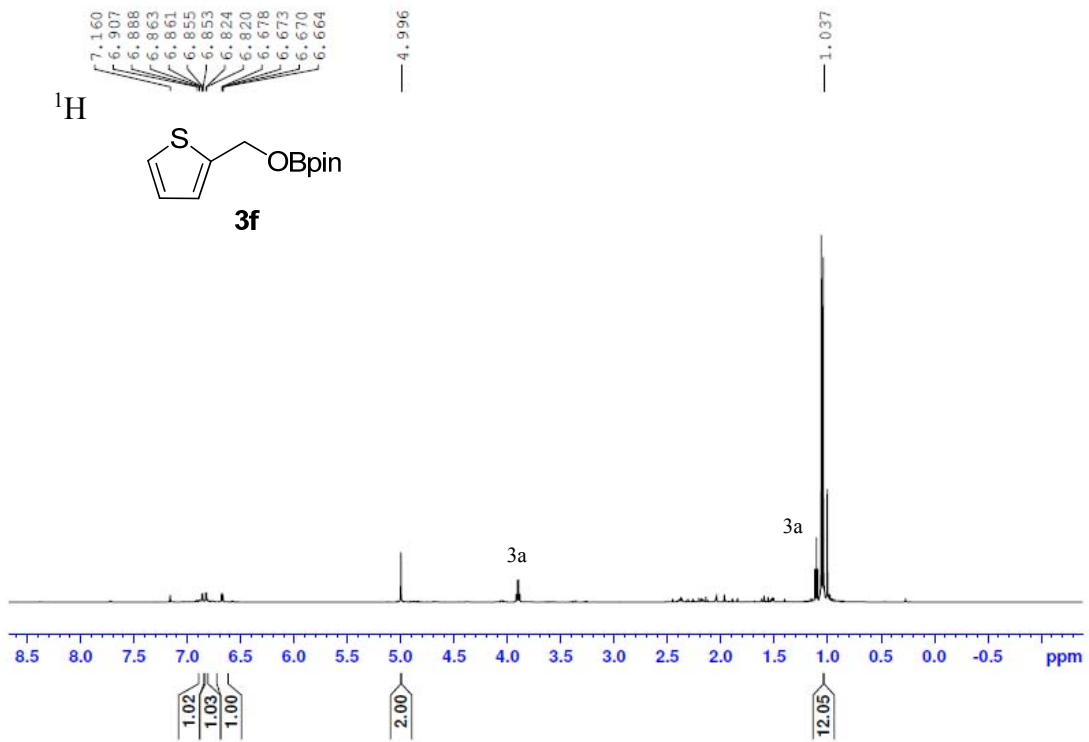

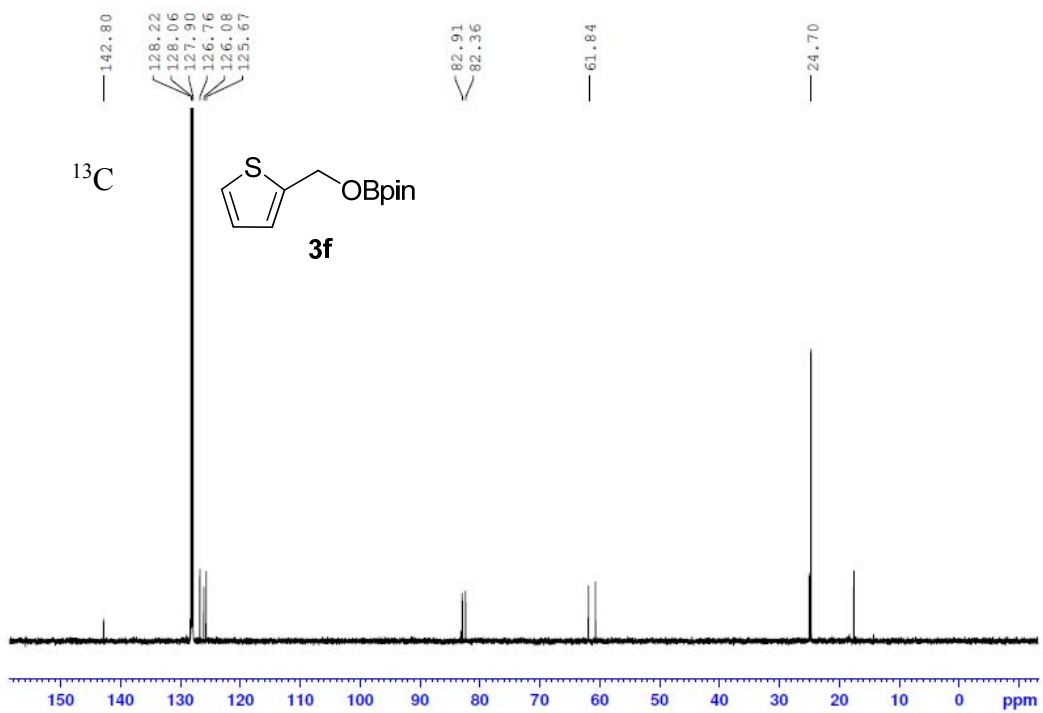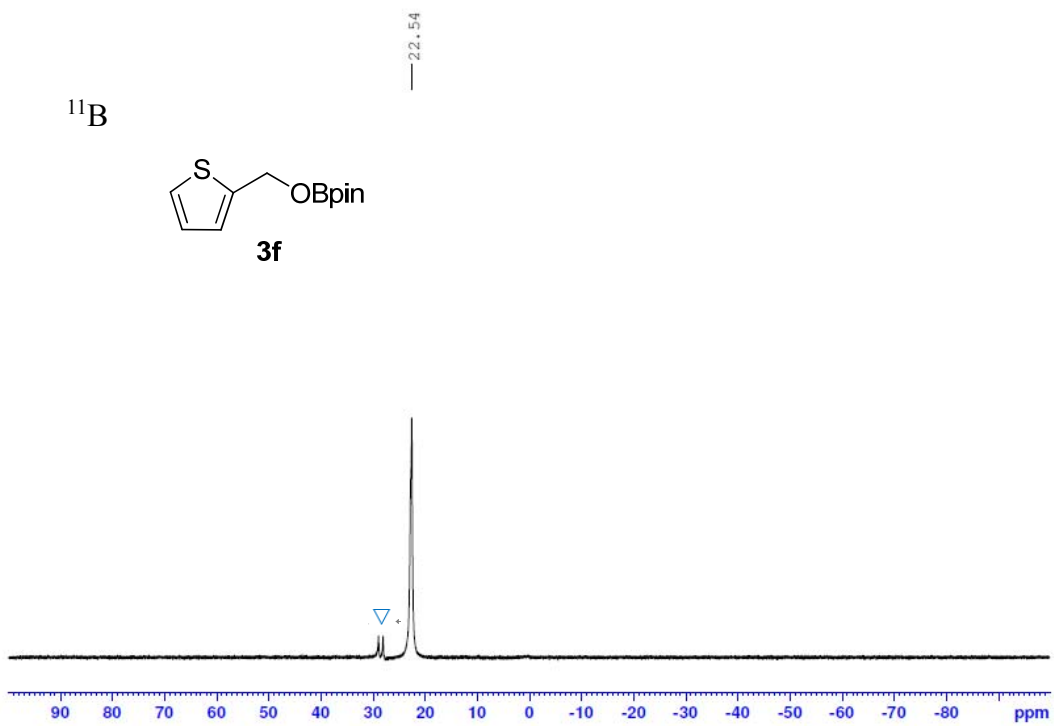

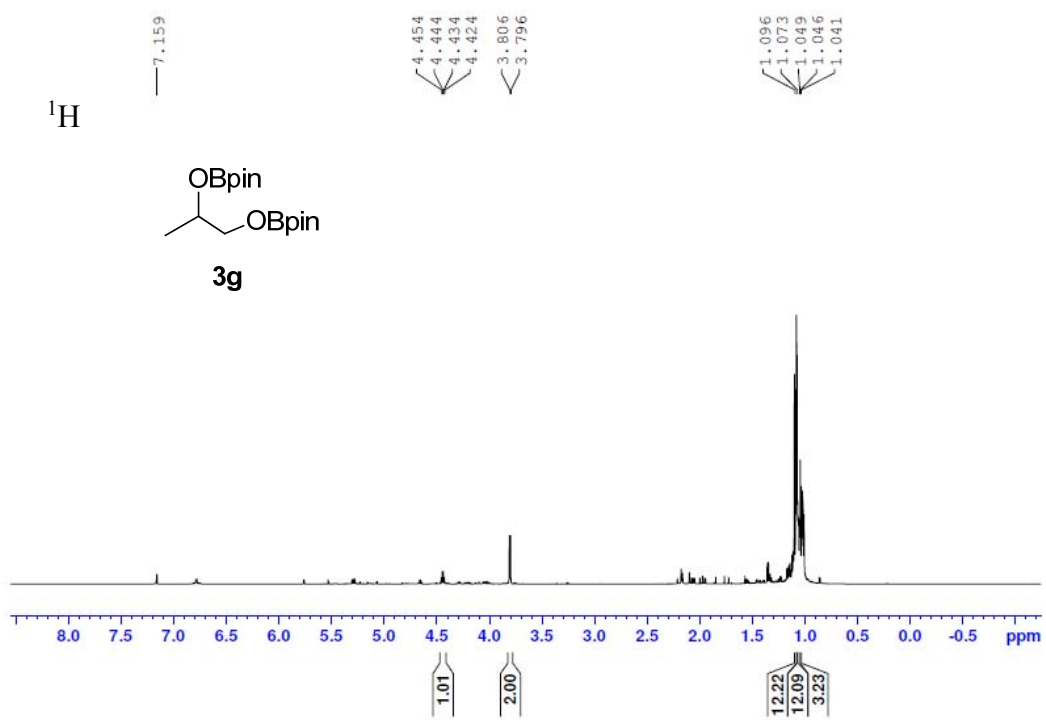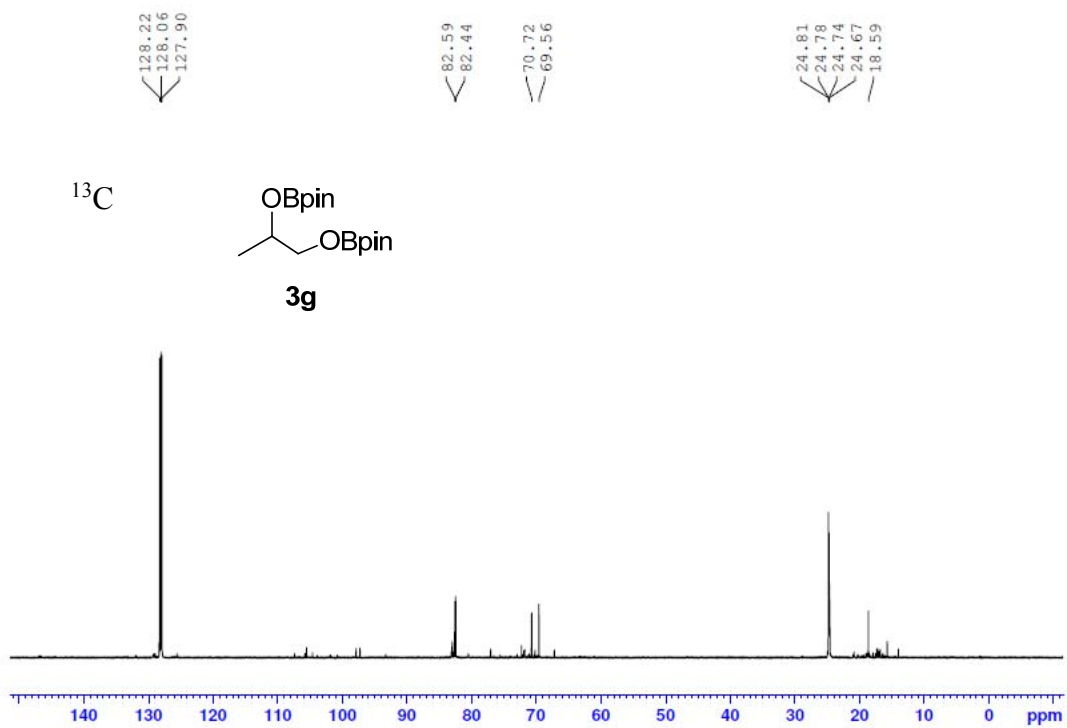



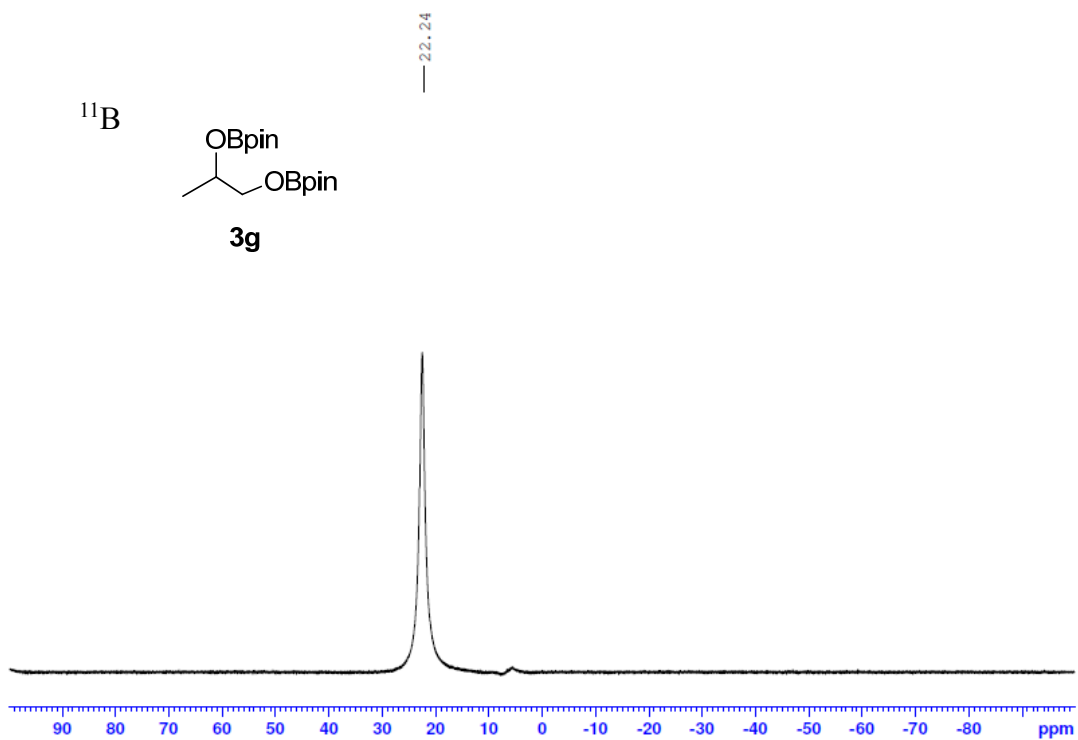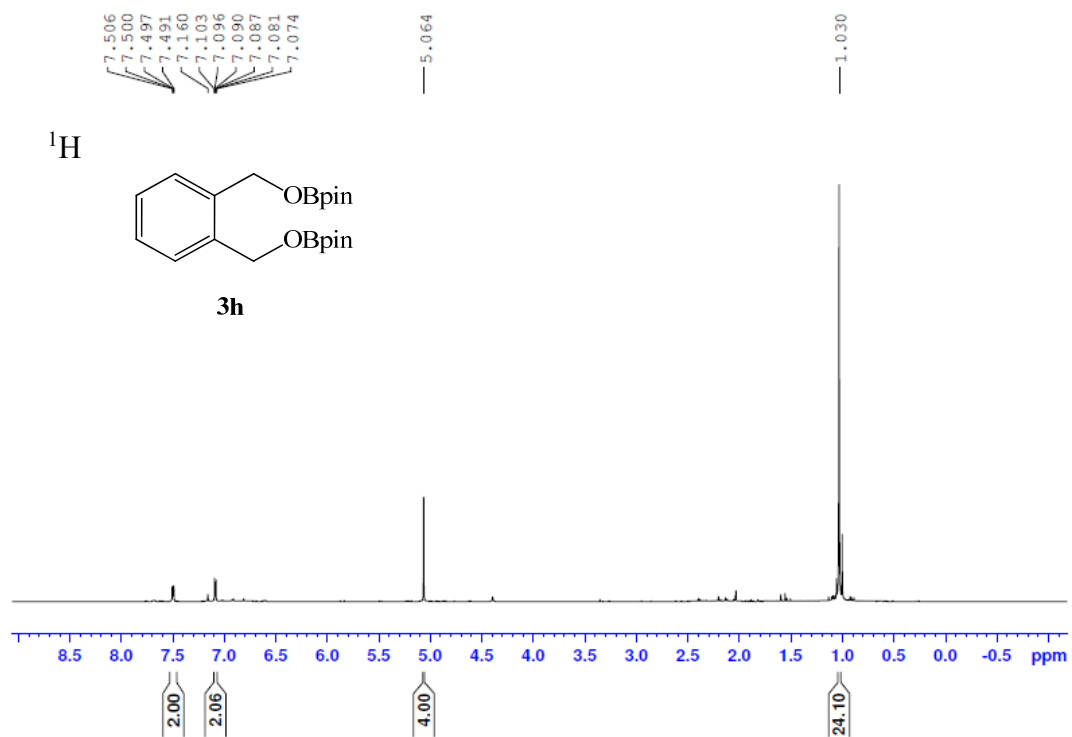

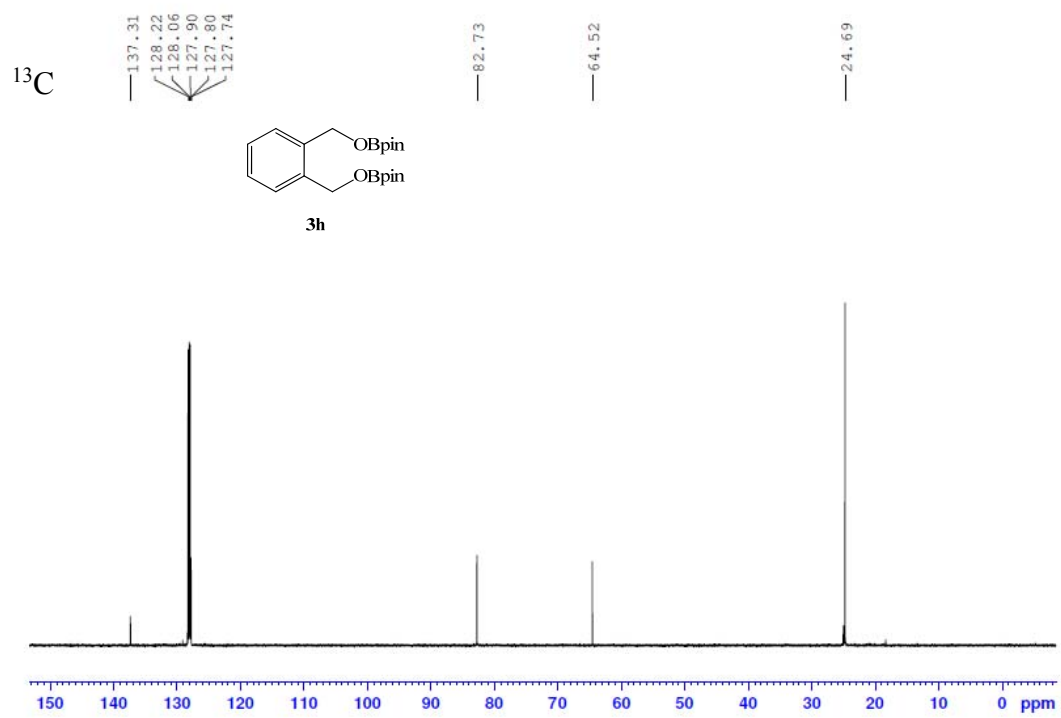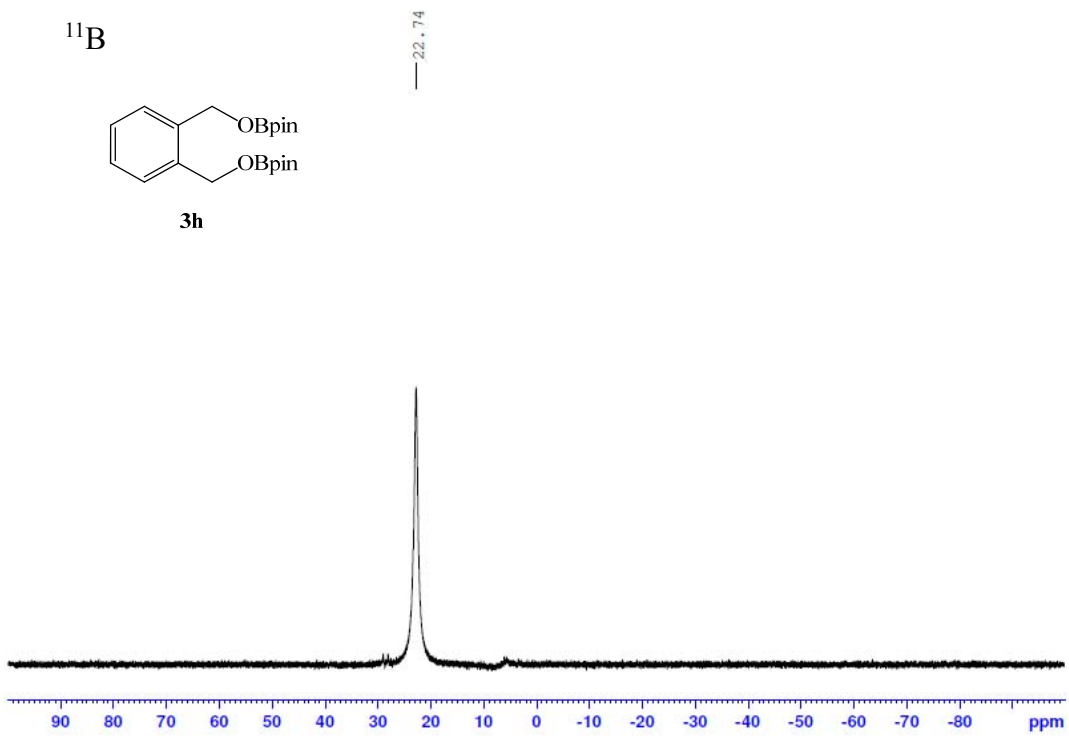

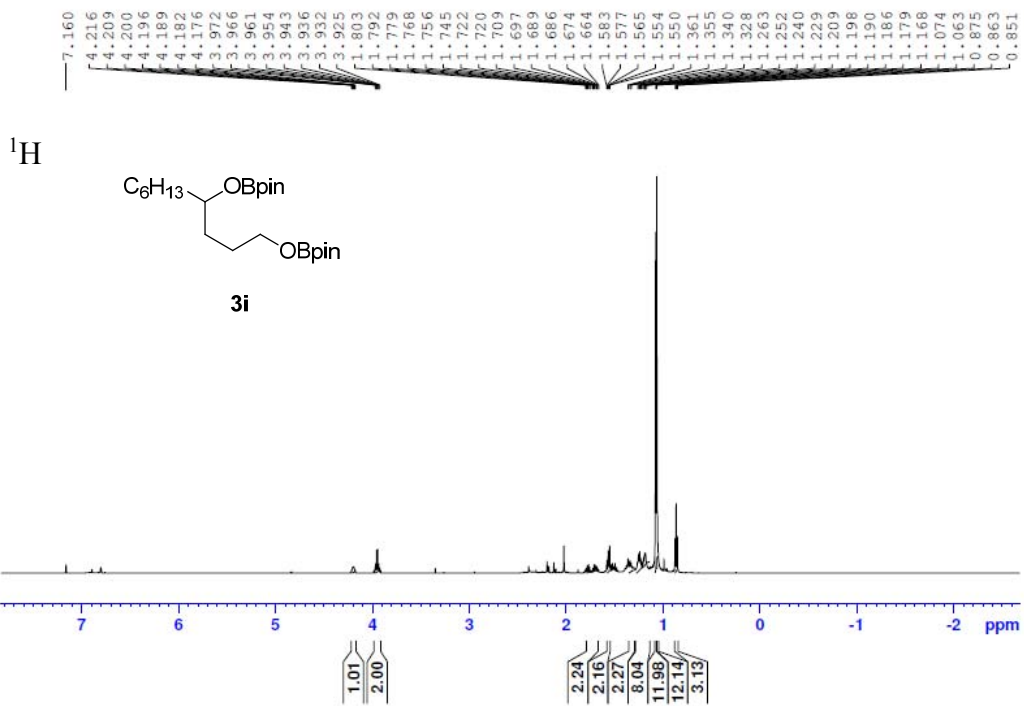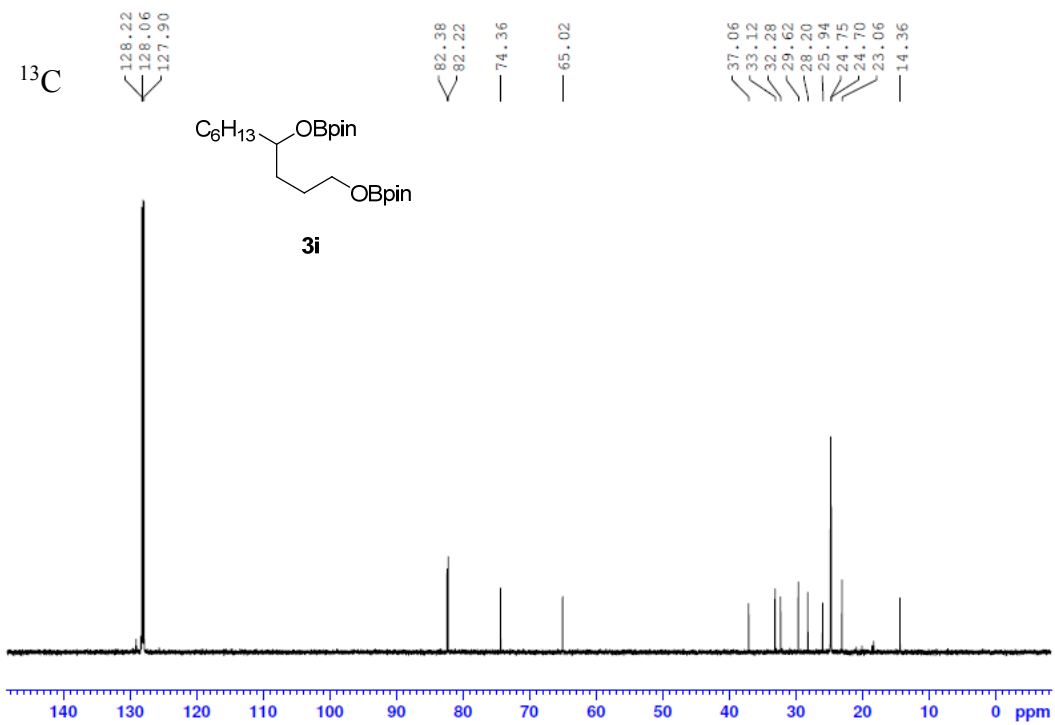



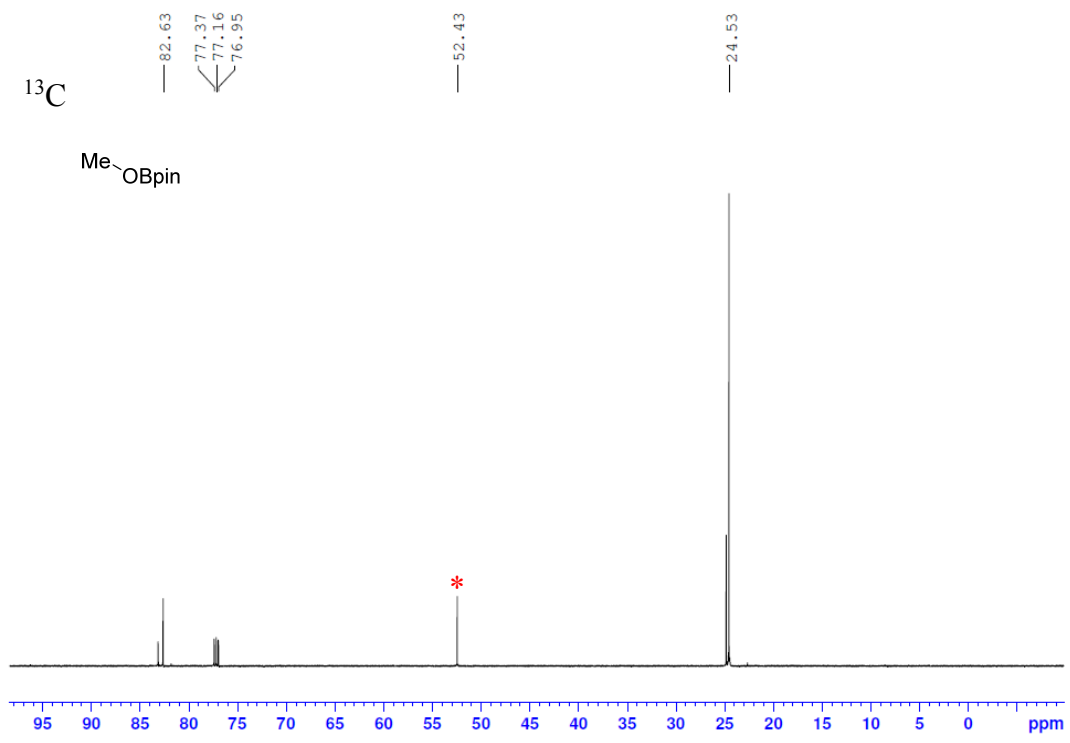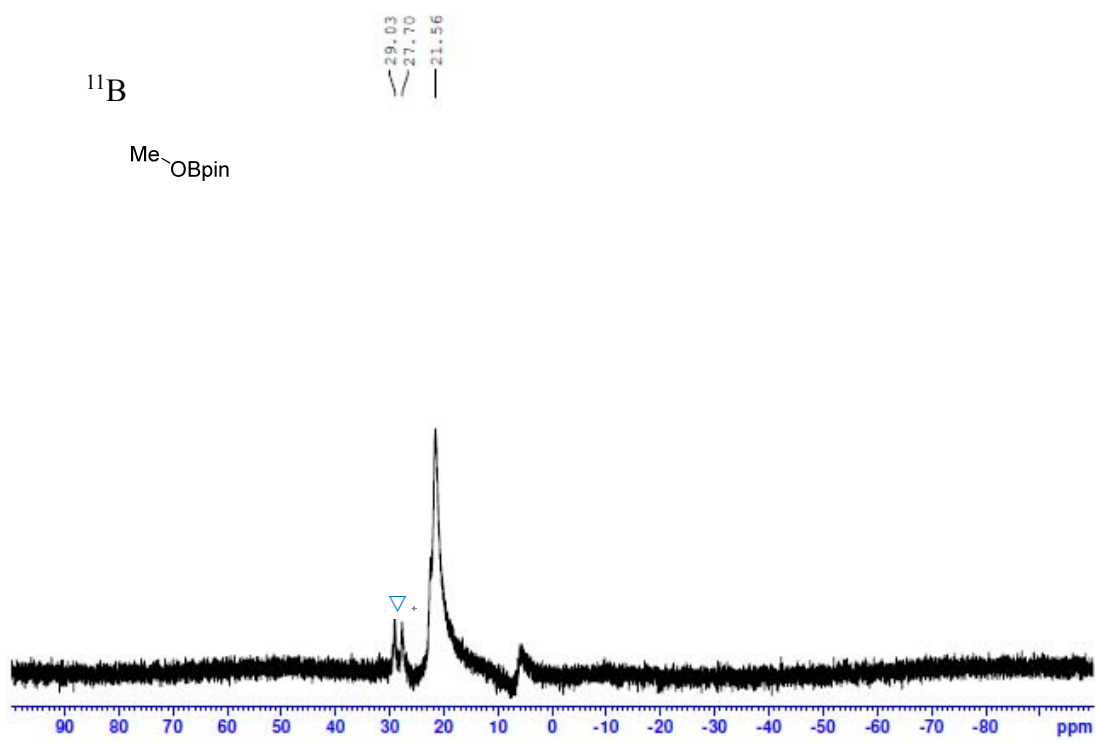

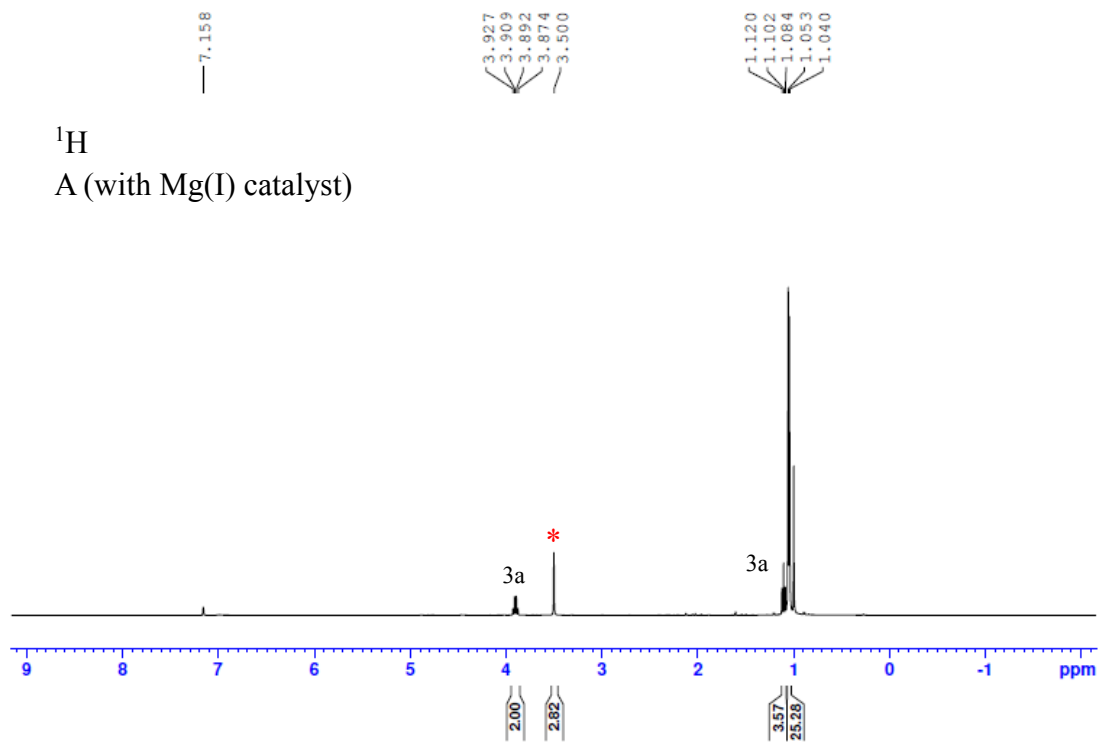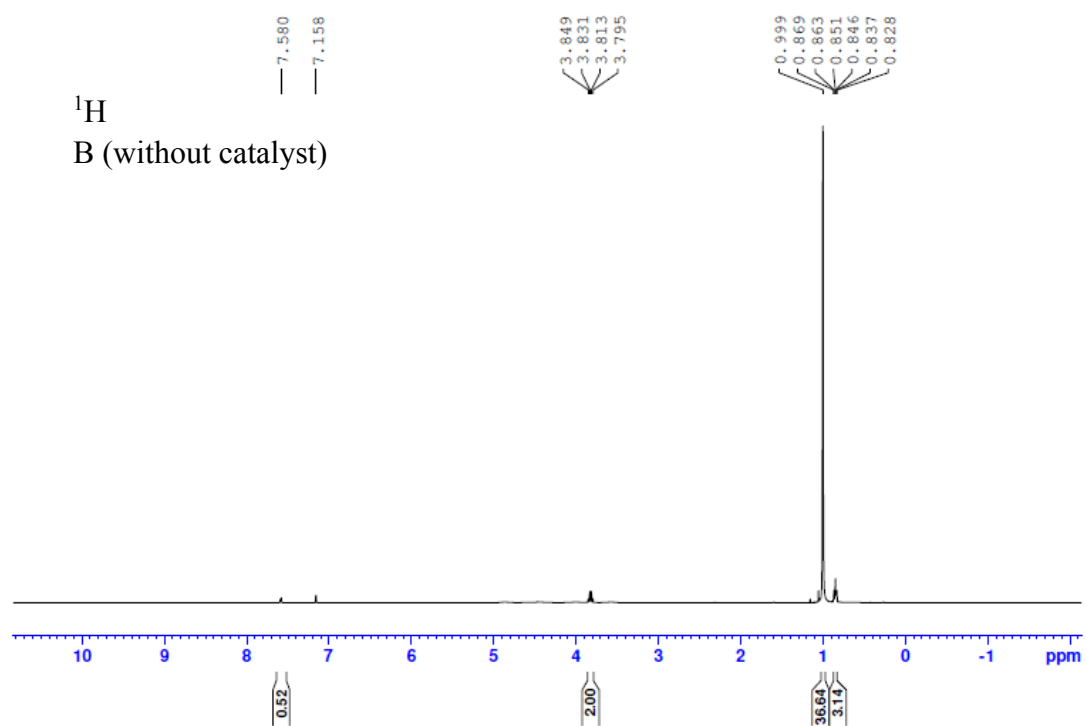

**References:**

- S1. S. P. Green, A. Stasch and C. Jones, *Science*, 2007, **318**, 1754.
- S2. S. J. Bonyhady, C. Jones, S. Nembenna, A. Stasch, A. J. Edwards and G. J. McIntyre, *Chem. Eur. J.*, 2010, **16**, 938.
- S3. S. J. Bonyhady, D. Collis, N. Holzmann, A. J. Edwards, R. O. Piltz, G. Frenking, A. Stasch and C. Jones, *Nat. Commun.*, 2018, **9**, 3079.
- S4. J. Li, M. Luo, X. sheng, H. Hua, W. Yao, S. A. Pullarkat, L. Xu and M. Ma, *Org. Chem. Front.*, 2018, **5**, 3538.
